# Supplementary material for: Immune Subtype Profiling and Establishment of Prognostic Immune-Related lncRNA Pairs in Human Ovarian Cancer
Source: PubMed Central journal article supplement (PMC9107039; doi:10.1155/2022/8338137), 2022-05-05
Supplement: 8338137.f2.pdf [file 8338137.f2.pdf]

Supplementary Table 1: Sample information table

| Clinical Features | TCGA-OV |
|-------------------|---------|
| <b>OS</b>         |         |
| 0                 | 143     |
| 1                 | 230     |
| <b>PFS</b>        |         |
| 0                 | 129     |
| 1                 | 239     |
| <b>Stage</b>      |         |
| I                 | 1       |
| II                | 21      |
| III               | 291     |
| IV                | 57      |
| X                 | 3       |
| <b>Grade</b>      |         |
| G1                | 1       |
| G2                | 42      |
| G3                | 319     |
| G4                | 1       |
| GX                | 10      |
| <b>Age</b>        |         |
| ≤ 60              | 204     |
| >60               | 169     |
