# Supplementary material for: Immune Subtype Profiling and Establishment of Prognostic Immune-Related lncRNA Pairs in Human Ovarian Cancer
Source: PubMed Central journal article supplement (PMC9107039; doi:10.1155/2022/8338137), 2022-05-05
Supplement: 8338137.f3.pdf [file 8338137.f3.pdf]

Supplementary Table2: 260 lncRNAs and 246 IRGs.

| lncRNA       | mRNA     | Corr     | P.value |
|--------------|----------|----------|---------|
| HCP5         | B2M      | 0.771155 | 0       |
| PSMB8-AS1    | B2M      | 0.770173 | 0       |
| USP30-AS1    | B2M      | 0.71345  | 0       |
| CCR5AS       | CD4      | 0.707196 | 0       |
| LINC01094    | CD4      | 0.790038 | 0       |
| AC006033.2   | CD4      | 0.716034 | 0       |
| AC011899.2   | CD4      | 0.797116 | 0       |
| LINC01150    | CD4      | 0.715265 | 0       |
| AC090559.1   | CD4      | 0.807458 | 0       |
| PCED1B-AS1   | CD4      | 0.738393 | 0       |
| AC138207.5   | CD4      | 0.710994 | 0       |
| AL590764.1   | CD4      | 0.716614 | 0       |
| LINC01871    | CD8A     | 0.752619 | 0       |
| LINC01934    | CD8A     | 0.753538 | 0       |
| LINC02084    | CD8A     | 0.780218 | 0       |
| TRG-AS1      | CD8A     | 0.760631 | 0       |
| LINC02446    | CD8A     | 0.800279 | 0       |
| PCED1B-AS1   | CD8A     | 0.706226 | 0       |
| LINC00426    | CD8A     | 0.791932 | 0       |
| AC004585.1   | CD8A     | 0.725516 | 0       |
| AC243960.1   | CD8A     | 0.757716 | 0       |
| LINC01094    | CTSS     | 0.751574 | 0       |
| PCED1B-AS1   | CTSS     | 0.70287  | 0       |
| CCR5AS       | FCER1G   | 0.813627 | 0       |
| LINC01094    | FCER1G   | 0.77134  | 0       |
| PCED1B-AS1   | FCER1G   | 0.873376 | 0       |
| AC138207.5   | FCER1G   | 0.726389 | 0       |
| AL590764.1   | FCER1G   | 0.738545 | 0       |
| HCP5         | HLA-A    | 0.846839 | 0       |
| PSMB8-AS1    | HLA-A    | 0.82818  | 0       |
| HCP5         | HLA-B    | 0.834953 | 0       |
| PSMB8-AS1    | HLA-B    | 0.838423 | 0       |
| HCP5         | HLA-C    | 0.782807 | 0       |
| PSMB8-AS1    | HLA-C    | 0.782678 | 0       |
| HLA-DQB1-AS1 | HLA-DMA  | 0.703982 | 0       |
| HLA-DQB1-AS1 | HLA-DPA1 | 0.70324  | 0       |
| PCED1B-AS1   | HLA-DPA1 | 0.721092 | 0       |
| HLA-DQB1-AS1 | HLA-DPB1 | 0.722646 | 0       |
| PCED1B-AS1   | HLA-DPB1 | 0.783437 | 0       |
| HLA-DQB1-AS1 | HLA-DQA1 | 0.776997 | 0       |
| PCED1B-AS1   | HLA-DQA1 | 0.758549 | 0       |
| HLA-DQB1-AS1 | HLA-DQB1 | 0.8819   | 0       |

---

|              |          |          |   |
|--------------|----------|----------|---|
| HLA-DQB1-AS1 | HLA-DRB1 | 0.734917 | 0 |
| HCP5         | HLA-E    | 0.794382 | 0 |
| PSMB8-AS1    | HLA-E    | 0.795617 | 0 |
| HCP5         | HLA-F    | 0.827345 | 0 |
| PSMB8-AS1    | HLA-F    | 0.824897 | 0 |
| USP30-AS1    | HLA-F    | 0.713617 | 0 |
| AC011700.1   | IFNA4    | 0.922975 | 0 |
| LINC01994    | IFNA4    | 0.800034 | 0 |
| AC073311.1   | IFNA4    | 0.799373 | 0 |
| AC002101.1   | IFNA4    | 0.88965  | 0 |
| LINC00391    | IFNA4    | 0.808753 | 0 |
| NAGPA-AS1    | IFNA4    | 0.746509 | 0 |
| AC011700.1   | IFNA7    | 0.80028  | 0 |
| LINC01994    | IFNA7    | 0.705935 | 0 |
| AC002101.1   | IFNA7    | 0.777525 | 0 |
| AL139254.1   | IFNA10   | 0.709612 | 0 |
| AC013269.2   | IFNA10   | 0.70904  | 0 |
| AC022145.1   | IFNA10   | 0.760909 | 0 |
| AC011700.1   | IFNA14   | 0.892535 | 0 |
| LINC01994    | IFNA14   | 0.772163 | 0 |
| AC073311.1   | IFNA14   | 0.770111 | 0 |
| AC002101.1   | IFNA14   | 0.860826 | 0 |
| LINC00391    | IFNA14   | 0.771197 | 0 |
| NAGPA-AS1    | IFNA14   | 0.737134 | 0 |
| AC073311.1   | IFNA16   | 0.789599 | 0 |
| AC011700.1   | IFNA17   | 0.920301 | 0 |
| LINC01994    | IFNA17   | 0.793746 | 0 |
| AC073311.1   | IFNA17   | 0.793243 | 0 |
| AC002101.1   | IFNA17   | 0.897648 | 0 |
| LINC00391    | IFNA17   | 0.794497 | 0 |
| NAGPA-AS1    | IFNA17   | 0.749045 | 0 |
| LINC01934    | IFNG     | 0.750825 | 0 |
| LINC02446    | IFNG     | 0.775623 | 0 |
| LINC00426    | IFNG     | 0.722374 | 0 |
| AC243829.4   | IFNG     | 0.728986 | 0 |
| HCP5         | PSMB8    | 0.762126 | 0 |
| PSMB8-AS1    | PSMB8    | 0.868873 | 0 |
| LINC01378    | SLC10A2  | 0.897134 | 0 |
| AC064807.3   | SLC10A2  | 0.905468 | 0 |
| LINC00560    | SLC10A2  | 0.731389 | 0 |
| AC135068.7   | SLC10A2  | 0.912202 | 0 |
| AL096828.1   | SLC10A2  | 0.713127 | 0 |
| HCP5         | TAP1     | 0.841432 | 0 |
| PSMB8-AS1    | TAP1     | 0.830819 | 0 |

---

---

|            |          |          |   |
|------------|----------|----------|---|
| USP30-AS1  | TAP1     | 0.741929 | 0 |
| PSMB8-AS1  | TAP2     | 0.753922 | 0 |
| LINC01614  | THBS1    | 0.781548 | 0 |
| LINC00702  | THBS1    | 0.766358 | 0 |
| ACTA2-AS1  | THBS1    | 0.737809 | 0 |
| AC037198.1 | THBS1    | 0.747191 | 0 |
| AC005288.1 | PSME3    | 0.702343 | 0 |
| OIP5-AS1   | UBR1     | 0.709699 | 0 |
| HCP5       | CXCL10   | 0.715033 | 0 |
| PSMB8-AS1  | CXCL10   | 0.723285 | 0 |
| USP30-AS1  | CXCL10   | 0.741107 | 0 |
| LINC01871  | CXCL9    | 0.71989  | 0 |
| LINC01934  | CXCL9    | 0.711132 | 0 |
| LINC02446  | CXCL9    | 0.712123 | 0 |
| PCED1B-AS1 | CXCL9    | 0.713117 | 0 |
| LINC00426  | CXCL9    | 0.710418 | 0 |
| AC004585.1 | CXCL9    | 0.740644 | 0 |
| AC243960.1 | CXCL9    | 0.712586 | 0 |
| PSMB8-AS1  | CXCL11   | 0.709945 | 0 |
| USP30-AS1  | CXCL11   | 0.741847 | 0 |
| LINC01614  | CXCL12   | 0.708379 | 0 |
| MSC-AS1    | CXCL12   | 0.705461 | 0 |
| AF067845.1 | DEFA6    | 0.727584 | 0 |
| LINC00556  | DEFA6    | 0.704128 | 0 |
| LINC00554  | DEFA6    | 0.758507 | 0 |
| LINC00905  | DEFA6    | 0.850114 | 0 |
| AC018685.2 | DEFA5    | 0.710272 | 0 |
| AC106706.1 | DEFA5    | 0.724362 | 0 |
| AF067845.1 | DEFA5    | 0.776156 | 0 |
| LINC00556  | DEFA5    | 0.748095 | 0 |
| LINC00554  | DEFA5    | 0.800981 | 0 |
| LINC00905  | DEFA5    | 0.89919  | 0 |
| AC145625.1 | DCD      | 0.775918 | 0 |
| FILNC1     | DCD      | 0.787566 | 0 |
| AP001970.1 | DCD      | 0.717415 | 0 |
| AC239727.1 | DCD      | 0.717263 | 0 |
| AC012349.1 | PENK     | 0.763647 | 0 |
| AC116366.1 | LEAP2    | 0.700838 | 0 |
| C15orf54   | DEFB129  | 0.741999 | 0 |
| AC091045.1 | DEFB129  | 0.761015 | 0 |
| FER1L6-AS1 | DEFB104B | 0.701068 | 0 |
| AC061709.2 | DEFB104B | 0.788739 | 0 |
| AC093725.2 | DEFB132  | 0.760863 | 0 |
| AC113423.2 | DEFB132  | 0.741082 | 0 |

---

---

|              |         |          |   |
|--------------|---------|----------|---|
| AC022039.1   | DEFB132 | 0.741092 | 0 |
| LINC02623    | DEFB132 | 0.719169 | 0 |
| AL157396.1   | DEFB132 | 0.719943 | 0 |
| LINC00523    | DEFB132 | 0.715195 | 0 |
| AL035250.2   | DEFB132 | 0.734082 | 0 |
| ANKRD34C-AS1 | DEFB118 | 0.741986 | 0 |
| LINC01614    | COLEC12 | 0.76718  | 0 |
| AC112721.1   | COLEC12 | 0.718063 | 0 |
| AC112721.2   | COLEC12 | 0.723473 | 0 |
| AC069360.1   | COLEC12 | 0.713823 | 0 |
| AC009093.1   | COLEC12 | 0.706278 | 0 |
| AC134312.5   | COLEC12 | 0.740454 | 0 |
| LINC01929    | COLEC12 | 0.705793 | 0 |
| AP005380.1   | DEFB114 | 0.702019 | 0 |
| AC011700.1   | DEFB113 | 0.732728 | 0 |
| AC108868.2   | DEFB113 | 0.712935 | 0 |
| AC002101.1   | DEFB113 | 0.724042 | 0 |
| AC055717.2   | DEFB113 | 0.700948 | 0 |
| AC093725.2   | DEFB112 | 0.750524 | 0 |
| AC113423.2   | DEFB112 | 0.735999 | 0 |
| AC022039.1   | DEFB112 | 0.720082 | 0 |
| AL157396.1   | DEFB112 | 0.706739 | 0 |
| LINC00523    | DEFB112 | 0.70442  | 0 |
| AL035250.2   | DEFB112 | 0.728475 | 0 |
| AC068672.3   | DEFB110 | 0.756756 | 0 |
| LINC00317    | DEFB110 | 0.82882  | 0 |
| TMSB15B-AS1  | TMSB15B | 0.719042 | 0 |
| AC068672.3   | DEFB133 | 0.707674 | 0 |
| LINC00317    | DEFB133 | 0.722954 | 0 |
| AL035604.1   | DEFB135 | 0.803449 | 0 |
| LINC02563    | TCHHL1  | 0.704029 | 0 |
| LINC01094    | TLR4    | 0.828795 | 0 |
| AC145098.1   | TLR4    | 0.723046 | 0 |
| AC006033.2   | TLR4    | 0.734021 | 0 |
| AC011899.2   | TLR4    | 0.809621 | 0 |
| LINC01150    | TLR4    | 0.700082 | 0 |
| AC090559.1   | TLR4    | 0.839966 | 0 |
| AC110995.1   | TLR4    | 0.762289 | 0 |
| CCR5AS       | TLR2    | 0.729734 | 0 |
| LINC01094    | TLR2    | 0.850836 | 0 |
| AC006033.2   | TLR2    | 0.722323 | 0 |
| AC011899.2   | TLR2    | 0.770952 | 0 |
| AC090559.1   | TLR2    | 0.778342 | 0 |
| LINC01614    | PLAU    | 0.804388 | 0 |

---

---

|            |        |          |   |
|------------|--------|----------|---|
| AL445490.1 | MX1    | 0.715115 | 0 |
| AP001610.2 | MX1    | 0.720585 | 0 |
| AL445490.1 | DDX58  | 0.706633 | 0 |
| AL117382.1 | R3HDML | 0.780879 | 0 |
| LINC00905  | FABP9  | 0.724843 | 0 |
| LINC02261  | BPIFA1 | 0.735641 | 0 |
| CCR5AS     | CYBB   | 0.784469 | 0 |
| LINC01094  | CYBB   | 0.868571 | 0 |
| AC145098.1 | CYBB   | 0.712057 | 0 |
| AC006033.2 | CYBB   | 0.767921 | 0 |
| AC011899.2 | CYBB   | 0.841888 | 0 |
| LINC01150  | CYBB   | 0.761375 | 0 |
| AC090559.1 | CYBB   | 0.841137 | 0 |
| PCED1B-AS1 | CYBB   | 0.789455 | 0 |
| AC138207.5 | CYBB   | 0.747471 | 0 |
| AC110995.1 | CYBB   | 0.747197 | 0 |
| AL590764.1 | CYBB   | 0.74324  | 0 |
| AC007991.2 | IDO1   | 0.786754 | 0 |
| AC007991.4 | IDO1   | 0.798138 | 0 |
| USP30-AS1  | IDO1   | 0.701928 | 0 |
| AC002546.1 | ADIPOQ | 0.775398 | 0 |
| USP30-AS1  | IRF1   | 0.71181  | 0 |
| CCR5AS     | TLR7   | 0.767873 | 0 |
| LINC01094  | TLR7   | 0.868248 | 0 |
| AC006033.2 | TLR7   | 0.769298 | 0 |
| AC011899.2 | TLR7   | 0.835648 | 0 |
| LINC01150  | TLR7   | 0.786276 | 0 |
| AC090559.1 | TLR7   | 0.846366 | 0 |
| PCED1B-AS1 | TLR7   | 0.725935 | 0 |
| LINC01146  | TLR7   | 0.70933  | 0 |
| AC138207.5 | TLR7   | 0.75354  | 0 |
| AF127936.1 | TLR7   | 0.726011 | 0 |
| AC110995.1 | TLR7   | 0.780854 | 0 |
| AL590764.1 | TLR7   | 0.716309 | 0 |
| AC018685.2 | PGC    | 0.705932 | 0 |
| LINC00905  | PGC    | 0.794919 | 0 |
| LINC01094  | LYZ    | 0.734595 | 0 |
| PCED1B-AS1 | LYZ    | 0.702857 | 0 |
| LINC01871  | CCL5   | 0.837032 | 0 |
| LINC02446  | CCL5   | 0.726155 | 0 |
| PCED1B-AS1 | CCL5   | 0.790864 | 0 |
| AC007728.2 | CYLD   | 0.702097 | 0 |
| CCR5AS     | TLR8   | 0.712164 | 0 |
| LINC01094  | TLR8   | 0.793039 | 0 |

---

---

|               |           |          |   |
|---------------|-----------|----------|---|
| AC011899.2    | TLR8      | 0.816326 | 0 |
| AC090559.1    | TLR8      | 0.790944 | 0 |
| AL590764.1    | TLR8      | 0.72696  | 0 |
| DNM3OS        | PDGFRA    | 0.749256 | 0 |
| FAM198B-AS1   | PDGFRA    | 0.755679 | 0 |
| MSC-AS1       | PDGFRA    | 0.719765 | 0 |
| WNT5A-AS1     | WNT5A     | 0.862512 | 0 |
| LINC01094     | TLR1      | 0.77896  | 0 |
| AC011899.2    | TLR1      | 0.708585 | 0 |
| AC090559.1    | TLR1      | 0.772214 | 0 |
| LINC02770     | FGA       | 0.779998 | 0 |
| AC004009.1    | FGA       | 0.711023 | 0 |
| FAM167A-AS1   | FGA       | 0.840385 | 0 |
| LINC01517     | FGA       | 0.764281 | 0 |
| AL355376.1    | FGA       | 0.832219 | 0 |
| LINC00837     | FGA       | 0.727486 | 0 |
| PLUT          | FGA       | 0.810485 | 0 |
| FREM2-AS1     | FGA       | 0.816528 | 0 |
| AC103982.1    | FGA       | 0.736097 | 0 |
| AC008938.1    | FGA       | 0.811202 | 0 |
| LINC01595     | FGA       | 0.837352 | 0 |
| HNF4A-AS1     | FGA       | 0.72025  | 0 |
| CCR5AS        | MSR1      | 0.735701 | 0 |
| LINC01094     | MSR1      | 0.891428 | 0 |
| AC011899.2    | MSR1      | 0.719189 | 0 |
| AC090559.1    | MSR1      | 0.709456 | 0 |
| PCED1B-AS1    | MSR1      | 0.720045 | 0 |
| AC110995.1    | MSR1      | 0.731888 | 0 |
| AL590764.1    | MSR1      | 0.707472 | 0 |
| LINC01739     | SEMG2     | 0.759863 | 0 |
| AL162400.2    | SEMG2     | 0.847495 | 0 |
| AC007126.1    | SEMG2     | 0.711625 | 0 |
| TNFRSF10A-AS1 | TNFRSF10A | 0.860951 | 0 |
| AC100861.1    | TNFRSF10A | 0.826775 | 0 |
| LINC01094     | CCL4      | 0.713174 | 0 |
| PCED1B-AS1    | CCL4      | 0.754121 | 0 |
| AC005288.1    | BECN1     | 0.790256 | 0 |
| LINC01934     | KLRK1     | 0.717883 | 0 |
| TRG-AS1       | KLRK1     | 0.744904 | 0 |
| LINC00861     | KLRK1     | 0.739537 | 0 |
| LINC00426     | KLRK1     | 0.727541 | 0 |
| AL365330.1    | MASP2     | 0.703366 | 0 |
| AL109811.2    | MASP2     | 0.762681 | 0 |
| AL109811.1    | MASP2     | 0.705898 | 0 |

---

---

|            |        |          |   |
|------------|--------|----------|---|
| LINC01772  | MASP2  | 0.746497 | 0 |
| HCG18      | TRIM27 | 0.755096 | 0 |
| LINC01614  | IL7R   | 0.702162 | 0 |
| LINC01934  | CD40LG | 0.714027 | 0 |
| LINC02273  | CD40LG | 0.722456 | 0 |
| TRG-AS1    | CD40LG | 0.738472 | 0 |
| LINC00861  | CD40LG | 0.763765 | 0 |
| LINC00426  | CD40LG | 0.753443 | 0 |
| AC004585.1 | CD40LG | 0.778191 | 0 |
| AC243960.1 | CD40LG | 0.76496  | 0 |
| LINC00892  | CD40LG | 0.763788 | 0 |
| CCR5AS     | CD14   | 0.785085 | 0 |
| LINC01094  | CD14   | 0.830974 | 0 |
| AC011899.2 | CD14   | 0.795534 | 0 |
| LINC01150  | CD14   | 0.759104 | 0 |
| AC090559.1 | CD14   | 0.760792 | 0 |
| PCED1B-AS1 | CD14   | 0.785136 | 0 |
| AC138207.5 | CD14   | 0.752197 | 0 |
| AC110995.1 | CD14   | 0.704746 | 0 |
| AL590764.1 | CD14   | 0.728752 | 0 |
| AC068631.1 | HRG    | 0.81758  | 0 |
| AL445490.1 | IRF9   | 0.711566 | 0 |
| AL135999.1 | IRF9   | 0.722947 | 0 |
| AL136295.2 | IRF9   | 0.713251 | 0 |
| LINC01094  | HMOX1  | 0.758602 | 0 |
| AC011899.2 | HMOX1  | 0.719513 | 0 |
| LINC01094  | PIK3CG | 0.779159 | 0 |
| AC145098.1 | PIK3CG | 0.751618 | 0 |
| AC006033.2 | PIK3CG | 0.732563 | 0 |
| AC011899.2 | PIK3CG | 0.837381 | 0 |
| AC090559.1 | PIK3CG | 0.846305 | 0 |
| AL445490.1 | RSAD2  | 0.711278 | 0 |
| NRIR       | RSAD2  | 0.73913  | 0 |
| LINC01614  | PDGFRB | 0.725314 | 0 |
| AC009093.1 | PDGFRB | 0.757152 | 0 |
| LINC01871  | FASLG  | 0.792071 | 0 |
| LINC01934  | FASLG  | 0.733209 | 0 |
| LINC02084  | FASLG  | 0.721951 | 0 |
| TRG-AS1    | FASLG  | 0.835147 | 0 |
| LINC02446  | FASLG  | 0.811978 | 0 |
| PCED1B-AS1 | FASLG  | 0.7016   | 0 |
| LINC00426  | FASLG  | 0.795159 | 0 |
| AC243829.4 | FASLG  | 0.724465 | 0 |
| AC243960.1 | FASLG  | 0.739614 | 0 |

---

---

|            |       |          |   |
|------------|-------|----------|---|
| AL445471.2 | IL22  | 0.729653 | 0 |
| LINC01350  | IL22  | 0.74042  | 0 |
| LINC01479  | IL22  | 0.717795 | 0 |
| AC011718.1 | IL22  | 0.756184 | 0 |
| AL133415.1 | VIM   | 0.831605 | 0 |
| LINC01614  | VCAM1 | 0.77412  | 0 |
| MSC-AS1    | VCAM1 | 0.703323 | 0 |
| AL662884.1 | AGER  | 0.706672 | 0 |
| AC099329.2 | ACKR2 | 0.920304 | 0 |
| LINC02273  | CCR7  | 0.721331 | 0 |
| LINC00861  | CCR7  | 0.768194 | 0 |
| AC243960.1 | CCR7  | 0.740795 | 0 |
| AC134312.5 | ACKR4 | 0.734705 | 0 |
| LINC01929  | ACKR4 | 0.792093 | 0 |
| AC023301.1 | ACKR4 | 0.74318  | 0 |
| LINC01614  | CCL11 | 0.752673 | 0 |
| CCR5AS     | CCR5  | 0.77422  | 0 |
| LINC01094  | CCR5  | 0.801499 | 0 |
| AC006033.2 | CCR5  | 0.756601 | 0 |
| TRG-AS1    | CCR5  | 0.773279 | 0 |
| AC011899.2 | CCR5  | 0.791397 | 0 |
| AC090559.1 | CCR5  | 0.743457 | 0 |
| PCED1B-AS1 | CCR5  | 0.809879 | 0 |
| LINC00426  | CCR5  | 0.729904 | 0 |
| AC015911.3 | CCR5  | 0.718369 | 0 |
| AC243960.1 | CCR5  | 0.74946  | 0 |
| AL590764.1 | CCR5  | 0.781321 | 0 |
| CCR5AS     | CCR1  | 0.745855 | 0 |
| LINC01094  | CCR1  | 0.809197 | 0 |
| AC011899.2 | CCR1  | 0.736751 | 0 |
| AC090559.1 | CCR1  | 0.702279 | 0 |
| AC110995.1 | CCR1  | 0.717565 | 0 |
| LINC01871  | XCL2  | 0.799809 | 0 |
| LINC01871  | CXCR6 | 0.815409 | 0 |
| LINC01934  | CXCR6 | 0.779928 | 0 |
| LINC02084  | CXCR6 | 0.724403 | 0 |
| TRG-AS1    | CXCR6 | 0.796935 | 0 |
| LINC02446  | CXCR6 | 0.804746 | 0 |
| PCED1B-AS1 | CXCR6 | 0.760925 | 0 |
| LINC00426  | CXCR6 | 0.805748 | 0 |
| LINC02195  | CXCR6 | 0.711227 | 0 |
| AC243829.4 | CXCR6 | 0.748682 | 0 |
| AC004585.1 | CXCR6 | 0.771362 | 0 |
| AC243960.1 | CXCR6 | 0.776281 | 0 |

---



---

|            |        |          |   |
|------------|--------|----------|---|
| LINC00861  | CCR4   | 0.737803 | 0 |
| AC004585.1 | CCR4   | 0.729631 | 0 |
| AC243960.1 | CCR4   | 0.737534 | 0 |
| LINC01094  | FGR    | 0.711825 | 0 |
| AC011899.2 | FGR    | 0.766485 | 0 |
| AC090559.1 | FGR    | 0.700302 | 0 |
| PCED1B-AS1 | FGR    | 0.715372 | 0 |
| CCR5AS     | CD86   | 0.828483 | 0 |
| LINC01094  | CD86   | 0.888696 | 0 |
| AC006033.2 | CD86   | 0.763647 | 0 |
| AC011899.2 | CD86   | 0.791979 | 0 |
| LINC01150  | CD86   | 0.737103 | 0 |
| AC090559.1 | CD86   | 0.758146 | 0 |
| PCED1B-AS1 | CD86   | 0.821824 | 0 |
| LINC01146  | CD86   | 0.718685 | 0 |
| AC138207.5 | CD86   | 0.733313 | 0 |
| AC110995.1 | CD86   | 0.727455 | 0 |
| AL590764.1 | CD86   | 0.774502 | 0 |
| CCR5AS     | HCK    | 0.777619 | 0 |
| LINC01094  | HCK    | 0.841485 | 0 |
| AC006033.2 | HCK    | 0.732927 | 0 |
| AC011899.2 | HCK    | 0.824724 | 0 |
| LINC01150  | HCK    | 0.728206 | 0 |
| AC090559.1 | HCK    | 0.792274 | 0 |
| PCED1B-AS1 | HCK    | 0.751599 | 0 |
| AC110995.1 | HCK    | 0.705872 | 0 |
| AL590764.1 | HCK    | 0.749285 | 0 |
| CCR5AS     | OLR1   | 0.737229 | 0 |
| LINC01094  | OLR1   | 0.803965 | 0 |
| AC011899.2 | OLR1   | 0.722439 | 0 |
| PCED1B-AS1 | OLR1   | 0.727408 | 0 |
| CCR5AS     | RNASE2 | 0.740131 | 0 |
| LINC01094  | RNASE2 | 0.726084 | 0 |
| PCED1B-AS1 | RNASE2 | 0.730334 | 0 |
| AL365361.1 | CD79A  | 0.745791 | 0 |
| LINC00582  | CD79A  | 0.741574 | 0 |
| LINC02362  | CD79A  | 0.780368 | 0 |
| CCR5AS     | BTK    | 0.817047 | 0 |
| LINC01094  | BTK    | 0.876847 | 0 |
| AC145098.1 | BTK    | 0.725919 | 0 |
| AC006033.2 | BTK    | 0.76552  | 0 |
| TRG-AS1    | BTK    | 0.708985 | 0 |
| AC011899.2 | BTK    | 0.859723 | 0 |
| LINC01150  | BTK    | 0.77074  | 0 |

---

---

|               |        |          |   |
|---------------|--------|----------|---|
| AC090559.1    | BTK    | 0.84163  | 0 |
| PCED1B-AS1    | BTK    | 0.810399 | 0 |
| LINC01146     | BTK    | 0.726957 | 0 |
| LINC02285     | BTK    | 0.721815 | 0 |
| AC138207.5    | BTK    | 0.741462 | 0 |
| AC243960.1    | BTK    | 0.703316 | 0 |
| AC110995.1    | BTK    | 0.731212 | 0 |
| AL590764.1    | BTK    | 0.803051 | 0 |
| PCED1B-AS1    | RAC2   | 0.782882 | 0 |
| AC138956.2    | NFAT5  | 0.703991 | 0 |
| AC108010.1    | NFAT5  | 0.731101 | 0 |
| AC108449.2    | NFAT5  | 0.70549  | 0 |
| TIMM23B-AGAP6 | NFAT5  | 0.702489 | 0 |
| AC137932.3    | NFAT5  | 0.710067 | 0 |
| AL731577.2    | NFATC3 | 0.707732 | 0 |
| AC025259.3    | FOS    | 0.784068 | 0 |
| LINC01094     | PIK3R5 | 0.777203 | 0 |
| AC145098.1    | PIK3R5 | 0.78582  | 0 |
| AC006033.2    | PIK3R5 | 0.728312 | 0 |
| AC011899.2    | PIK3R5 | 0.861459 | 0 |
| LINC01150     | PIK3R5 | 0.716233 | 0 |
| AC090559.1    | PIK3R5 | 0.84924  | 0 |
| AC011899.2    | INPP5D | 0.704862 | 0 |
| AC090559.1    | INPP5D | 0.740216 | 0 |
| U62631.1      | CD22   | 0.85189  | 0 |
| LINC01094     | LILRB3 | 0.706793 | 0 |
| AC011899.2    | LILRB3 | 0.725244 | 0 |
| CCR5AS        | FCGR2B | 0.797531 | 0 |
| LINC01094     | FCGR2B | 0.828467 | 0 |
| AC011899.2    | FCGR2B | 0.762429 | 0 |
| LINC01150     | FCGR2B | 0.714282 | 0 |
| PCED1B-AS1    | FCGR2B | 0.821939 | 0 |
| LINC02285     | FCGR2B | 0.703932 | 0 |
| AC138207.5    | FCGR2B | 0.709569 | 0 |
| AL590764.1    | FCGR2B | 0.755504 | 0 |
| AC008760.2    | C3     | 0.750748 | 0 |
| AL133346.1    | CCN1   | 0.703481 | 0 |
| LINC00702     | SEMA3D | 0.701472 | 0 |
| AL592424.1    | SEMA6C | 0.757322 | 0 |
| LINC01094     | TYMP   | 0.702011 | 0 |
| PCED1B-AS1    | TYMP   | 0.754203 | 0 |
| LINC01094     | C5AR1  | 0.733863 | 0 |
| CCR5AS        | CCRL2  | 0.766355 | 0 |
| LINC01094     | CCRL2  | 0.8107   | 0 |

---

---

|            |         |          |   |
|------------|---------|----------|---|
| AC011899.2 | CCRL2   | 0.745366 | 0 |
| AL590764.1 | CCRL2   | 0.717338 | 0 |
| AC011899.2 | CMKLR1  | 0.703709 | 0 |
| LINC01871  | CXCR3   | 0.787277 | 0 |
| LINC01934  | CXCR3   | 0.717482 | 0 |
| TRG-AS1    | CXCR3   | 0.729085 | 0 |
| LINC00861  | CXCR3   | 0.701183 | 0 |
| LINC02446  | CXCR3   | 0.728192 | 0 |
| PCED1B-AS1 | CXCR3   | 0.808637 | 0 |
| LINC00426  | CXCR3   | 0.743278 | 0 |
| AC004585.1 | CXCR3   | 0.751436 | 0 |
| AC243960.1 | CXCR3   | 0.753502 | 0 |
| AL590764.1 | CXCR3   | 0.727711 | 0 |
| LINC01614  | EDNRA   | 0.753315 | 0 |
| CCR5AS     | FPR1    | 0.715162 | 0 |
| LINC01094  | FPR1    | 0.806129 | 0 |
| AC011899.2 | FPR1    | 0.7292   | 0 |
| AC090559.1 | FPR1    | 0.735179 | 0 |
| AC245128.3 | FPR2    | 0.737816 | 0 |
| AC018685.2 | AMBN    | 0.725405 | 0 |
| AC106706.1 | AMBN    | 0.71542  | 0 |
| AF067845.1 | AMBN    | 0.734096 | 0 |
| LINC00554  | AMBN    | 0.748721 | 0 |
| LINC00905  | AMBN    | 0.843956 | 0 |
| AC092155.1 | ANGPTL5 | 0.800405 | 0 |
| AL355612.1 | ANGPTL5 | 0.77167  | 0 |
| AL353611.1 | ANGPTL5 | 0.717783 | 0 |
| AC022166.1 | ANGPTL5 | 0.78305  | 0 |
| LINC01267  | BMP15   | 0.721517 | 0 |
| AC020763.1 | BMP15   | 0.707641 | 0 |
| AL122058.1 | BMP7    | 0.80782  | 0 |
| AC008687.2 | CGB7    | 0.728688 | 0 |
| LINC02647  | CGB8    | 0.751262 | 0 |
| AC025437.1 | CRH     | 0.724954 | 0 |
| AC009446.1 | CRH     | 0.75399  | 0 |
| AL133346.1 | CCN2    | 0.814171 | 0 |
| CCR5AS     | EBI3    | 0.728275 | 0 |
| AC011899.2 | EBI3    | 0.702874 | 0 |
| PCED1B-AS1 | EBI3    | 0.715264 | 0 |
| AL139147.1 | FGF1    | 0.725602 | 0 |
| HECW2-AS1  | FGF1    | 0.7338   | 0 |
| LINC01614  | FGF1    | 0.752985 | 0 |
| AC004160.1 | FGF1    | 0.707999 | 0 |
| LINC00702  | FGF1    | 0.744881 | 0 |

---

---

|             |        |          |   |
|-------------|--------|----------|---|
| FGF13-AS1   | FGF13  | 0.761236 | 0 |
| LINC01141   | FGF22  | 0.747347 | 0 |
| ZNF385D-AS2 | FGF6   | 0.73253  | 0 |
| LINC02500   | FGF6   | 0.73456  | 0 |
| AL133166.1  | FGF6   | 0.743324 | 0 |
| LINC01916   | FGF6   | 0.740159 | 0 |
| TTY10       | FGF6   | 0.721349 | 0 |
| HECW2-AS1   | FGF7   | 0.744327 | 0 |
| LINC01614   | FGF7   | 0.806765 | 0 |
| AC105384.1  | FGF7   | 0.715399 | 0 |
| MSC-AS1     | FGF7   | 0.72138  | 0 |
| LINC00702   | FGF7   | 0.818745 | 0 |
| ACTA2-AS1   | FGF7   | 0.745841 | 0 |
| LINC01638   | FGF7   | 0.720307 | 0 |
| AC068987.3  | FIGNL2 | 0.963381 | 0 |
| FIGNL2-DT   | FIGNL2 | 0.860513 | 0 |
| AC024614.1  | GCG    | 0.992243 | 0 |
| GDNF-AS1    | GDNF   | 0.778545 | 0 |
| LINC01943   | GMFG   | 0.712626 | 0 |
| CCR5AS      | GMFG   | 0.81987  | 0 |
| LINC01094   | GMFG   | 0.742356 | 0 |
| AC147651.4  | GMFG   | 0.715127 | 0 |
| PCED1B-AS1  | GMFG   | 0.884166 | 0 |
| LINC02285   | GMFG   | 0.704636 | 0 |
| AC138207.5  | GMFG   | 0.730218 | 0 |
| AL590764.1  | GMFG   | 0.781803 | 0 |
| AC091185.1  | GNRH1  | 0.739641 | 0 |
| HECW2-AS1   | GREM1  | 0.735383 | 0 |
| LINC01614   | GREM1  | 0.794518 | 0 |
| LINC01615   | GREM1  | 0.714116 | 0 |
| LINC02544   | GREM1  | 0.749479 | 0 |
| AC134312.5  | GREM1  | 0.722354 | 0 |
| LINC01929   | GREM1  | 0.760165 | 0 |
| LINC01429   | GREM1  | 0.700434 | 0 |
| MIR31HG     | IFNE   | 0.739356 | 0 |
| AC011700.1  | IFNW1  | 0.702405 | 0 |
| IGF2-AS     | IGF2   | 0.839099 | 0 |
| AC145098.1  | IL16   | 0.712861 | 0 |
| AC011899.2  | IL16   | 0.736548 | 0 |
| AC090559.1  | IL16   | 0.76458  | 0 |
| AL161772.1  | IL17D  | 0.805227 | 0 |
| LINC01378   | IL17F  | 0.75117  | 0 |
| AC064807.3  | IL17F  | 0.756399 | 0 |
| AC135068.7  | IL17F  | 0.765015 | 0 |

---

---

|            |          |          |   |
|------------|----------|----------|---|
| AC108462.1 | IL1F10   | 0.755658 | 0 |
| LINC01849  | IL1F10   | 0.72109  | 0 |
| AC022239.1 | IL36A    | 0.718449 | 0 |
| AL445471.2 | IL26     | 0.741482 | 0 |
| LINC01350  | IL26     | 0.760698 | 0 |
| AC011718.1 | IL26     | 0.775084 | 0 |
| AL121910.1 | IL31     | 0.707066 | 0 |
| AL139147.1 | INHBA    | 0.71001  | 0 |
| AL136987.1 | INHBA    | 0.717311 | 0 |
| AC007750.1 | INHBA    | 0.802256 | 0 |
| HECW2-AS1  | INHBA    | 0.802457 | 0 |
| LINC01614  | INHBA    | 0.893622 | 0 |
| AC112721.1 | INHBA    | 0.730513 | 0 |
| AC112721.2 | INHBA    | 0.727947 | 0 |
| AC011352.1 | INHBA    | 0.730391 | 0 |
| AC011352.3 | INHBA    | 0.706341 | 0 |
| AL356417.2 | INHBA    | 0.714277 | 0 |
| AL109924.1 | INHBA    | 0.747334 | 0 |
| LINC01615  | INHBA    | 0.742159 | 0 |
| LINC02544  | INHBA    | 0.751712 | 0 |
| AC004160.1 | INHBA    | 0.719031 | 0 |
| LINC00702  | INHBA    | 0.812922 | 0 |
| ACTA2-AS1  | INHBA    | 0.718189 | 0 |
| LNCOG      | INHBA    | 0.708165 | 0 |
| LINC00519  | INHBA    | 0.701524 | 0 |
| AC134312.5 | INHBA    | 0.729219 | 0 |
| LINC01929  | INHBA    | 0.744968 | 0 |
| LINC01429  | INHBA    | 0.710843 | 0 |
| AC004264.1 | LIF      | 0.859599 | 0 |
| AC007848.2 | NTF3     | 0.724565 | 0 |
| AC008687.3 | NTF4     | 0.761325 | 0 |
| AC124301.1 | PPY      | 0.708195 | 0 |
| C8orf49    | PROK1    | 0.748406 | 0 |
| MIR202HG   | PROK1    | 0.729964 | 0 |
| AC022098.2 | RLN3     | 0.917698 | 0 |
| LINC01614  | SCG2     | 0.752865 | 0 |
| LINC01929  | SCG2     | 0.701236 | 0 |
| LINC01094  | SPP1     | 0.73209  | 0 |
| TGFB2-AS1  | TGFB2    | 0.8646   | 0 |
| CCR5AS     | TNFSF13B | 0.731969 | 0 |
| LINC01094  | TNFSF13B | 0.792457 | 0 |
| PCED1B-AS1 | TNFSF13B | 0.753273 | 0 |
| AL355095.1 | UTS2B    | 0.779612 | 0 |
| LINC00469  | UTS2B    | 0.856664 | 0 |

---

---

|             |         |          |   |
|-------------|---------|----------|---|
| CSPG4P1Y    | UTS2B   | 0.876456 | 0 |
| LINC01614   | ANGPTL2 | 0.712956 | 0 |
| AC009093.1  | ANGPTL2 | 0.730676 | 0 |
| AL136084.3  | APLNR   | 0.71435  | 0 |
| AC244035.1  | AVPR1B  | 0.912311 | 0 |
| CCR5AS      | C3AR1   | 0.805587 | 0 |
| LINC01094   | C3AR1   | 0.893098 | 0 |
| AC006033.2  | C3AR1   | 0.753287 | 0 |
| AC011899.2  | C3AR1   | 0.825125 | 0 |
| LINC01150   | C3AR1   | 0.783216 | 0 |
| AC090559.1  | C3AR1   | 0.82637  | 0 |
| PCED1B-AS1  | C3AR1   | 0.788031 | 0 |
| AC138207.5  | C3AR1   | 0.739664 | 0 |
| AC110995.1  | C3AR1   | 0.767843 | 0 |
| AL590764.1  | C3AR1   | 0.752535 | 0 |
| CNTFR-AS1   | CNTFR   | 0.708473 | 0 |
| CCR5AS      | CSF1R   | 0.751511 | 0 |
| LINC01094   | CSF1R   | 0.836788 | 0 |
| AC145098.1  | CSF1R   | 0.732206 | 0 |
| AC006033.2  | CSF1R   | 0.741178 | 0 |
| AC011899.2  | CSF1R   | 0.866039 | 0 |
| LINC01150   | CSF1R   | 0.791229 | 0 |
| AC090559.1  | CSF1R   | 0.872879 | 0 |
| PCED1B-AS1  | CSF1R   | 0.730063 | 0 |
| AC138207.5  | CSF1R   | 0.754873 | 0 |
| AC110995.1  | CSF1R   | 0.742066 | 0 |
| CCR5AS      | CSF2RA  | 0.767173 | 0 |
| LINC01094   | CSF2RA  | 0.806268 | 0 |
| AC006033.2  | CSF2RA  | 0.709362 | 0 |
| AC011899.2  | CSF2RA  | 0.783198 | 0 |
| LINC01150   | CSF2RA  | 0.741938 | 0 |
| AC090559.1  | CSF2RA  | 0.792576 | 0 |
| PCED1B-AS1  | CSF2RA  | 0.751967 | 0 |
| AC138207.5  | CSF2RA  | 0.715003 | 0 |
| AL590764.1  | CSF2RA  | 0.716402 | 0 |
| CCR5AS      | CSF2RB  | 0.701095 | 0 |
| LINC01094   | CSF2RB  | 0.783531 | 0 |
| AC145098.1  | CSF2RB  | 0.765217 | 0 |
| AC006033.2  | CSF2RB  | 0.706454 | 0 |
| AC011899.2  | CSF2RB  | 0.818216 | 0 |
| AC090559.1  | CSF2RB  | 0.81269  | 0 |
| AL590764.1  | CSF2RB  | 0.702758 | 0 |
| FAM198B-AS1 | ENG     | 0.726947 | 0 |
| LINC01391   | ESR2    | 0.791603 | 0 |

---

---

|            |         |          |   |
|------------|---------|----------|---|
| C8orf49    | ESR2    | 0.708359 | 0 |
| MIR202HG   | ESR2    | 0.725563 | 0 |
| AC091806.1 | ESR2    | 0.794868 | 0 |
| AC087623.1 | FGFR1   | 0.725963 | 0 |
| AC092155.1 | FSHR    | 0.762732 | 0 |
| AC022166.1 | FSHR    | 0.761889 | 0 |
| AL138812.1 | GHSR    | 0.739765 | 0 |
| AC013248.1 | GHSR    | 0.787841 | 0 |
| LINC02038  | HNF4A   | 0.799268 | 0 |
| HNF1A-AS1  | HNF4A   | 0.788539 | 0 |
| HNF4A-AS1  | HNF4A   | 0.732872 | 0 |
| CCR5AS     | IL10RA  | 0.762625 | 0 |
| LINC01094  | IL10RA  | 0.839442 | 0 |
| AC145098.1 | IL10RA  | 0.762497 | 0 |
| AC006033.2 | IL10RA  | 0.749976 | 0 |
| TRG-AS1    | IL10RA  | 0.714114 | 0 |
| AC011899.2 | IL10RA  | 0.867444 | 0 |
| LINC01150  | IL10RA  | 0.744892 | 0 |
| AC090559.1 | IL10RA  | 0.849846 | 0 |
| PCED1B-AS1 | IL10RA  | 0.781057 | 0 |
| LINC01146  | IL10RA  | 0.709802 | 0 |
| AC138207.5 | IL10RA  | 0.743548 | 0 |
| AC004687.1 | IL10RA  | 0.701365 | 0 |
| AC110995.1 | IL10RA  | 0.716755 | 0 |
| AL590764.1 | IL10RA  | 0.748781 | 0 |
| AC011899.2 | IL12RB1 | 0.716697 | 0 |
| PCED1B-AS1 | IL12RB1 | 0.751704 | 0 |
| AL590764.1 | IL12RB1 | 0.710121 | 0 |
| LINC01871  | IL2RB   | 0.774241 | 0 |
| TRG-AS1    | IL2RB   | 0.771067 | 0 |
| PCED1B-AS1 | IL2RB   | 0.743188 | 0 |
| LINC00426  | IL2RB   | 0.709774 | 0 |
| AC243960.1 | IL2RB   | 0.708028 | 0 |
| LINC01871  | IL18RAP | 0.711679 | 0 |
| TRG-AS1    | IL18RAP | 0.742818 | 0 |
| LINC01934  | IL21R   | 0.718535 | 0 |
| LINC01094  | IL21R   | 0.704469 | 0 |
| TRG-AS1    | IL21R   | 0.749405 | 0 |
| LINC00996  | IL21R   | 0.70104  | 0 |
| PCED1B-AS1 | IL21R   | 0.762712 | 0 |
| LINC00426  | IL21R   | 0.751136 | 0 |
| AC004585.1 | IL21R   | 0.764639 | 0 |
| AC243960.1 | IL21R   | 0.760019 | 0 |
| AL590764.1 | IL21R   | 0.738971 | 0 |

---

---

|            |           |          |   |
|------------|-----------|----------|---|
| LINC01871  | IL2RG     | 0.794248 | 0 |
| CCR5AS     | IL2RG     | 0.70012  | 0 |
| TRG-AS1    | IL2RG     | 0.715421 | 0 |
| PCED1B-AS1 | IL2RG     | 0.826724 | 0 |
| AC004585.1 | IL2RG     | 0.715565 | 0 |
| AC243960.1 | IL2RG     | 0.711567 | 0 |
| AL590764.1 | IL2RG     | 0.711533 | 0 |
| AC106739.1 | IL4R      | 0.845949 | 0 |
| LINC01765  | IL5RA     | 0.828114 | 0 |
| AC104809.1 | IL5RA     | 0.713801 | 0 |
| SRGAP3-AS2 | IL5RA     | 0.810276 | 0 |
| LINC01267  | IL5RA     | 0.728725 | 0 |
| HHATL-AS1  | IL5RA     | 0.748129 | 0 |
| LINC01513  | IL5RA     | 0.738765 | 0 |
| AC010255.1 | IL5RA     | 0.722446 | 0 |
| AC010255.2 | IL5RA     | 0.719396 | 0 |
| AC113349.1 | IL5RA     | 0.727261 | 0 |
| AL161618.1 | IL5RA     | 0.817179 | 0 |
| AL590491.2 | IL5RA     | 0.724898 | 0 |
| AL353770.4 | IL5RA     | 0.707582 | 0 |
| LINC02730  | IL5RA     | 0.717075 | 0 |
| AL357093.2 | IL5RA     | 0.764443 | 0 |
| AL357093.1 | IL5RA     | 0.732964 | 0 |
| UMODL1-AS1 | IL5RA     | 0.752051 | 0 |
| LINC00426  | IL9R      | 0.712588 | 0 |
| AC093278.2 | KDR       | 0.711807 | 0 |
| AC078860.2 | LGR5      | 0.800008 | 0 |
| AC092155.1 | NR1H4     | 0.721583 | 0 |
| LINC01391  | NR1H4     | 0.705514 | 0 |
| C8orf49    | NR1H4     | 0.774179 | 0 |
| FGD5-AS1   | NR2C2     | 0.701349 | 0 |
| SH3BP5-AS1 | NR2C2     | 0.707685 | 0 |
| AC090948.2 | NR2C2     | 0.716601 | 0 |
| AC138956.2 | NR2C2     | 0.72425  | 0 |
| AC108010.1 | NR2C2     | 0.783841 | 0 |
| AC104938.1 | NR2E3     | 0.838561 | 0 |
| NR2F1-AS1  | NR2F1     | 0.85411  | 0 |
| AC103746.1 | NR2F2     | 0.709294 | 0 |
| AC025259.3 | NR4A1     | 0.865616 | 0 |
| LINC02074  | PRLHR     | 0.736839 | 0 |
| AL031429.2 | PTGER3    | 0.730209 | 0 |
| AL109741.1 | S1PR1     | 0.712327 | 0 |
| SSTR5-AS1  | SSTR5     | 0.863465 | 0 |
| AC011899.2 | TNFRSF11A | 0.718694 | 0 |

---



---

|              |           |          |   |
|--------------|-----------|----------|---|
| AL365361.1   | TNFRSF13B | 0.734045 | 0 |
| LINC00861    | TNFRSF13B | 0.701943 | 0 |
| AC243960.1   | TNFRSF13B | 0.731632 | 0 |
| TNFRSF14-AS1 | TNFRSF14  | 0.770424 | 0 |
| AL365361.1   | TNFRSF17  | 0.751633 | 0 |
| LINC00582    | TNFRSF17  | 0.809537 | 0 |
| LINC02362    | TNFRSF17  | 0.84933  | 0 |
| AC246787.2   | TNFRSF17  | 0.743263 | 0 |
| LINC00327    | TNFRSF19  | 0.733154 | 0 |
| AC011899.2   | TNFRSF1B  | 0.734964 | 0 |
| AC090559.1   | TNFRSF1B  | 0.711907 | 0 |
| VIPR1-AS1    | VIPR1     | 0.777446 | 0 |
| CCR5AS       | ITGAL     | 0.719346 | 0 |
| LINC01094    | ITGAL     | 0.755984 | 0 |
| AC145098.1   | ITGAL     | 0.739874 | 0 |
| AC006033.2   | ITGAL     | 0.742249 | 0 |
| TRG-AS1      | ITGAL     | 0.782208 | 0 |
| AC011899.2   | ITGAL     | 0.803507 | 0 |
| LINC00861    | ITGAL     | 0.72166  | 0 |
| AC090559.1   | ITGAL     | 0.761159 | 0 |
| PCED1B-AS1   | ITGAL     | 0.801946 | 0 |
| LINC00426    | ITGAL     | 0.74888  | 0 |
| AC138207.5   | ITGAL     | 0.707732 | 0 |
| AC015911.3   | ITGAL     | 0.709941 | 0 |
| AC004687.1   | ITGAL     | 0.737996 | 0 |
| AC243960.1   | ITGAL     | 0.765728 | 0 |
| AL590764.1   | ITGAL     | 0.738377 | 0 |
| CCR5AS       | ITGB2     | 0.769724 | 0 |
| LINC01094    | ITGB2     | 0.825475 | 0 |
| AC006033.2   | ITGB2     | 0.721528 | 0 |
| AC011899.2   | ITGB2     | 0.826969 | 0 |
| LINC01150    | ITGB2     | 0.713435 | 0 |
| AC090559.1   | ITGB2     | 0.805419 | 0 |
| PCED1B-AS1   | ITGB2     | 0.768226 | 0 |
| AC138207.5   | ITGB2     | 0.70884  | 0 |
| AL590764.1   | ITGB2     | 0.712913 | 0 |
| AP003680.1   | PAK1      | 0.71722  | 0 |
| CCR5AS       | TYROBP    | 0.817704 | 0 |
| LINC01094    | TYROBP    | 0.760595 | 0 |
| AC147651.4   | TYROBP    | 0.703523 | 0 |
| PCED1B-AS1   | TYROBP    | 0.871256 | 0 |
| AC138207.5   | TYROBP    | 0.747074 | 0 |
| AL590764.1   | TYROBP    | 0.736016 | 0 |
| TRG-AS1      | LCK       | 0.705142 | 0 |

---

---

|            |        |          |   |
|------------|--------|----------|---|
| LINC00426  | LCK    | 0.725475 | 0 |
| AC243960.1 | LCK    | 0.703071 | 0 |
| CCR5AS     | FCGR3A | 0.731427 | 0 |
| LINC01094  | FCGR3A | 0.875088 | 0 |
| AC011899.2 | FCGR3A | 0.762168 | 0 |
| AC090559.1 | FCGR3A | 0.750611 | 0 |
| PCED1B-AS1 | FCGR3A | 0.753402 | 0 |
| AC110995.1 | FCGR3A | 0.715502 | 0 |
| AL590764.1 | FCGR3A | 0.725456 | 0 |
| LINC01871  | NCR3   | 0.755918 | 0 |
| LINC01871  | CD247  | 0.800316 | 0 |
| LINC01934  | CD247  | 0.743478 | 0 |
| LINC02084  | CD247  | 0.708074 | 0 |
| TRG-AS1    | CD247  | 0.838089 | 0 |
| LINC00861  | CD247  | 0.715101 | 0 |
| LINC02446  | CD247  | 0.763323 | 0 |
| PCED1B-AS1 | CD247  | 0.764961 | 0 |
| LINC00426  | CD247  | 0.78764  | 0 |
| AC243829.4 | CD247  | 0.702149 | 0 |
| AC004585.1 | CD247  | 0.745921 | 0 |
| AC243960.1 | CD247  | 0.78582  | 0 |
| AL590764.1 | CD247  | 0.7145   | 0 |
| LINC01934  | ZAP70  | 0.737126 | 0 |
| TRG-AS1    | ZAP70  | 0.797897 | 0 |
| LINC00861  | ZAP70  | 0.795205 | 0 |
| LINC00426  | ZAP70  | 0.804491 | 0 |
| AC015911.3 | ZAP70  | 0.726669 | 0 |
| AC004585.1 | ZAP70  | 0.737941 | 0 |
| AC243960.1 | ZAP70  | 0.783477 | 0 |
| CCR5AS     | LCP2   | 0.806867 | 0 |
| LINC01094  | LCP2   | 0.857973 | 0 |
| AC006033.2 | LCP2   | 0.769471 | 0 |
| TRG-AS1    | LCP2   | 0.739886 | 0 |
| AC011899.2 | LCP2   | 0.799126 | 0 |
| LINC01150  | LCP2   | 0.725775 | 0 |
| AC090559.1 | LCP2   | 0.783787 | 0 |
| PCED1B-AS1 | LCP2   | 0.842199 | 0 |
| LINC01146  | LCP2   | 0.73111  | 0 |
| AC138207.5 | LCP2   | 0.748263 | 0 |
| AC243960.1 | LCP2   | 0.72222  | 0 |
| AL590764.1 | LCP2   | 0.780465 | 0 |
| AC109460.3 | LAT    | 0.824836 | 0 |
| FGD5-AS1   | RAF1   | 0.775768 | 0 |
| PCED1B-AS1 | HCST   | 0.772409 | 0 |

---

---

|            |        |          |   |
|------------|--------|----------|---|
| LINC01871  | CD48   | 0.720937 | 0 |
| CCR5AS     | CD48   | 0.816311 | 0 |
| LINC01094  | CD48   | 0.789917 | 0 |
| TRG-AS1    | CD48   | 0.702149 | 0 |
| PCED1B-AS1 | CD48   | 0.860004 | 0 |
| LINC01146  | CD48   | 0.714061 | 0 |
| AC243960.1 | CD48   | 0.735477 | 0 |
| AL590764.1 | CD48   | 0.787776 | 0 |
| LINC01871  | CD244  | 0.701003 | 0 |
| TRG-AS1    | CD244  | 0.815227 | 0 |
| LINC02446  | CD244  | 0.729288 | 0 |
| PCED1B-AS1 | CD244  | 0.706597 | 0 |
| LINC00426  | CD244  | 0.744188 | 0 |
| AC243960.1 | CD244  | 0.743577 | 0 |
| AL365361.1 | SH2D1A | 0.738012 | 0 |
| LINC01871  | SH2D1A | 0.73609  | 0 |
| LINC01943  | SH2D1A | 0.716996 | 0 |
| LINC01934  | SH2D1A | 0.805061 | 0 |
| LINC02084  | SH2D1A | 0.768741 | 0 |
| TRG-AS1    | SH2D1A | 0.783095 | 0 |
| LINC00861  | SH2D1A | 0.758654 | 0 |
| LINC02446  | SH2D1A | 0.770167 | 0 |
| PCED1B-AS1 | SH2D1A | 0.756255 | 0 |
| LINC00426  | SH2D1A | 0.811327 | 0 |
| AC243829.4 | SH2D1A | 0.709099 | 0 |
| AC004585.1 | SH2D1A | 0.811577 | 0 |
| AC243960.1 | SH2D1A | 0.843012 | 0 |
| AL590764.1 | SH2D1A | 0.702312 | 0 |
| AL157394.1 | FAS    | 0.74968  | 0 |
| LINC01871  | GZMB   | 0.776337 | 0 |
| LINC01871  | PRF1   | 0.809777 | 0 |
| TRG-AS1    | PRF1   | 0.766289 | 0 |
| LINC02446  | PRF1   | 0.746815 | 0 |
| PCED1B-AS1 | PRF1   | 0.703182 | 0 |
| LINC00426  | PRF1   | 0.718418 | 0 |
| LINC01871  | CD3D   | 0.845931 | 0 |
| LINC01943  | CD3D   | 0.742957 | 0 |
| LINC01934  | CD3D   | 0.730722 | 0 |
| LINC02084  | CD3D   | 0.715538 | 0 |
| LINC02446  | CD3D   | 0.736336 | 0 |
| PCED1B-AS1 | CD3D   | 0.829522 | 0 |
| LINC00426  | CD3D   | 0.72435  | 0 |
| AC004585.1 | CD3D   | 0.764468 | 0 |
| AC243960.1 | CD3D   | 0.749637 | 0 |

---

---

|            |       |          |   |
|------------|-------|----------|---|
| AL590764.1 | CD3D  | 0.713634 | 0 |
| LINC01871  | CD3E  | 0.838339 | 0 |
| LINC01934  | CD3E  | 0.74925  | 0 |
| LINC02084  | CD3E  | 0.71941  | 0 |
| TRG-AS1    | CD3E  | 0.754137 | 0 |
| LINC00861  | CD3E  | 0.723252 | 0 |
| LINC02446  | CD3E  | 0.756916 | 0 |
| PCED1B-AS1 | CD3E  | 0.838217 | 0 |
| LINC00426  | CD3E  | 0.768427 | 0 |
| AC004585.1 | CD3E  | 0.770835 | 0 |
| AC243960.1 | CD3E  | 0.778853 | 0 |
| AL590764.1 | CD3E  | 0.707131 | 0 |
| LINC01871  | CD3G  | 0.710154 | 0 |
| LINC01934  | CD3G  | 0.762933 | 0 |
| LINC02084  | CD3G  | 0.735125 | 0 |
| TRG-AS1    | CD3G  | 0.77194  | 0 |
| LINC00861  | CD3G  | 0.733066 | 0 |
| LINC02446  | CD3G  | 0.763938 | 0 |
| LINC00426  | CD3G  | 0.779546 | 0 |
| AC004585.1 | CD3G  | 0.747084 | 0 |
| AC243960.1 | CD3G  | 0.775368 | 0 |
| CCR5AS     | PTPRC | 0.794298 | 0 |
| LINC01094  | PTPRC | 0.863429 | 0 |
| AC006033.2 | PTPRC | 0.776389 | 0 |
| TRG-AS1    | PTPRC | 0.755666 | 0 |
| AC011899.2 | PTPRC | 0.815124 | 0 |
| LINC01150  | PTPRC | 0.718135 | 0 |
| AC090559.1 | PTPRC | 0.801598 | 0 |
| PCED1B-AS1 | PTPRC | 0.836766 | 0 |
| LINC00426  | PTPRC | 0.702119 | 0 |
| LINC01146  | PTPRC | 0.721493 | 0 |
| AC138207.5 | PTPRC | 0.715075 | 0 |
| AC243960.1 | PTPRC | 0.764242 | 0 |
| AL590764.1 | PTPRC | 0.785162 | 0 |
| AL365361.1 | ITK   | 0.724296 | 0 |
| LINC01871  | ITK   | 0.720206 | 0 |
| LINC01934  | ITK   | 0.791301 | 0 |
| LINC02084  | ITK   | 0.719394 | 0 |
| LINC02273  | ITK   | 0.741035 | 0 |
| TRG-AS1    | ITK   | 0.822158 | 0 |
| LINC00996  | ITK   | 0.710439 | 0 |
| LINC00861  | ITK   | 0.819824 | 0 |
| LINC02446  | ITK   | 0.778618 | 0 |
| PCED1B-AS1 | ITK   | 0.741804 | 0 |

---

---

|            |       |          |   |
|------------|-------|----------|---|
| LINC00426  | ITK   | 0.844591 | 0 |
| AC015911.3 | ITK   | 0.765795 | 0 |
| AC243829.4 | ITK   | 0.705077 | 0 |
| AC004585.1 | ITK   | 0.797491 | 0 |
| AC243960.1 | ITK   | 0.834909 | 0 |
| LINC01934  | GRAP2 | 0.76932  | 0 |
| TRG-AS1    | GRAP2 | 0.781194 | 0 |
| LINC00861  | GRAP2 | 0.778464 | 0 |
| LINC02446  | GRAP2 | 0.723912 | 0 |
| LINC00426  | GRAP2 | 0.81738  | 0 |
| AC015911.3 | GRAP2 | 0.750212 | 0 |
| AC004585.1 | GRAP2 | 0.739935 | 0 |
| AC243960.1 | GRAP2 | 0.763774 | 0 |
| LINC01934  | ICOS  | 0.743119 | 0 |
| AL591468.1 | ICOS  | 0.700161 | 0 |
| TRG-AS1    | ICOS  | 0.743042 | 0 |
| LINC02446  | ICOS  | 0.743205 | 0 |
| LINC00426  | ICOS  | 0.743693 | 0 |
| AC004585.1 | ICOS  | 0.720276 | 0 |
| AC243960.1 | ICOS  | 0.761847 | 0 |
| LINC01943  | CTLA4 | 0.709371 | 0 |
| LINC01934  | CTLA4 | 0.708566 | 0 |
| LINC00426  | CTLA4 | 0.704611 | 0 |
| AC004585.1 | CTLA4 | 0.708449 | 0 |
| AC243960.1 | CTLA4 | 0.72044  | 0 |
| AC078883.1 | PDK1  | 0.717271 | 0 |
| PRKCQ-AS1  | PRKCQ | 0.83875  | 0 |

---
