# Supplementary material for: Immune Subtype Profiling and Establishment of Prognostic Immune-Related lncRNA Pairs in Human Ovarian Cancer
Source: PubMed Central journal article supplement (PMC9107039; doi:10.1155/2022/8338137), 2022-05-05
Supplement: 8338137.f4.pdf [file 8338137.f4.pdf]

Supplementary Table3: TCGA lncRNA pair data were analyzed and 426 lncRNA pairs were obtained.

| lncRNA                     | p.value      | HR           | Low<br>95%CI | High<br>95%CI |
|----------------------------|--------------|--------------|--------------|---------------|
| AC092198.1-vs-AC003009.1   | 0.00488<br>2 | 0.52283<br>6 | 0.33285<br>5 | 0.82125       |
| AL691482.3-vs-AC003009.1   | 0.00583<br>1 | 0.05947<br>8 | 0.008        | 0.44220<br>9  |
| AC018647.2-vs-AC004253.1   | 0.0008       | 0.03013<br>5 | 0.00389<br>1 | 0.23341<br>3  |
| AC135050.5-vs-AC004895.1   | 0.00058<br>2 | 0.17398      | 0.06423      | 0.47125<br>8  |
| AL691482.3-vs-AC005332.7   | 0.00732<br>5 | 0.49525<br>3 | 0.29633<br>8 | 0.82768<br>8  |
| LINC00884-vs-AC005552.1    | 0.00500<br>9 | 0.05636<br>8 | 0.00756<br>5 | 0.42003<br>7  |
| AC007608.1-vs-AC005552.1   | 0.00617<br>7 | 1.47461<br>5 | 1.11671<br>4 | 1.94722<br>1  |
| AC018647.2-vs-AC006435.2   | 4.97E-05     | 0.14813<br>9 | 0.05888<br>7 | 0.37266<br>5  |
| LINC02352-vs-AC007040.1    | 0.00312<br>9 | 0.47083<br>2 | 0.28567<br>5 | 0.77599<br>5  |
| AP001094.3-vs-AC007040.1   | 0.00056<br>1 | 0.63038<br>2 | 0.48501<br>7 | 0.81931<br>6  |
| AC106037.2-vs-AC007040.1   | 0.00207<br>6 | 0.66328<br>4 | 0.51074<br>6 | 0.86137<br>8  |
| AP001094.3-vs-AC007216.1   | 0.00656<br>6 | 0.69744<br>5 | 0.53785<br>9 | 0.90438       |
| AL024498.1-vs-AC007216.1   | 0.00037<br>2 | 0.25171<br>2 | 0.11776<br>6 | 0.53800<br>9  |
| AC010531.6-vs-AC007406.3   | 0.00272<br>9 | 0.64109<br>9 | 0.47934<br>5 | 0.85743<br>7  |
| AL390208.1-vs-AC007431.2   | 0.00150<br>5 | 0.41332<br>9 | 0.23951<br>7 | 0.71327       |
| AL596325.2-vs-AC007598.2   | 0.00505<br>8 | 0.48685<br>3 | 0.29433<br>2 | 0.8053        |
| AC106037.2-vs-AC007598.2   | 0.00753<br>8 | 0.69990<br>7 | 0.53873<br>7 | 0.90929<br>1  |
| AL691482.3-vs-AC007598.2   | 0.00583<br>1 | 0.05947<br>8 | 0.008        | 0.44220<br>9  |
| AL391845.1-vs-AC007608.1   | 0.00601<br>7 | 0.67940<br>3 | 0.51564      | 0.89517<br>7  |
| KIAA2012-AS1-vs-AC007608.1 | 0.00698      | 0.69015      | 0.52713      | 0.90357       |

|                          |          |         |         |         |
|--------------------------|----------|---------|---------|---------|
|                          | 7        | 2       | 7       | 9       |
| MRV1-AS1-vs-AC007608.1   | 0.00451  | 0.61194 | 0.43601 | 0.85884 |
|                          | 3        |         | 6       | 5       |
| AL024498.1-vs-AC007608.1 | 0.00276  | 0.11428 | 0.02760 | 0.47306 |
|                          | 5        | 4       | 9       | 1       |
| C22orf24-vs-AC007608.1   | 0.00842  | 0.65733 | 0.48108 | 0.89815 |
|                          | 9        | 6       | 6       | 7       |
| AC090229.1-vs-AC007787.1 | 0.00431  | 0.59648 | 0.41831 | 0.85053 |
|                          | 4        | 4       | 7       | 6       |
| AC092868.2-vs-AC007787.1 | 0.00443  | 0.65373 | 0.48782 | 0.87607 |
|                          |          | 5       | 6       |         |
| PRR34-vs-AC007787.1      | 0.00939  | 0.57504 | 0.37878 | 0.87300 |
|                          |          | 7       | 1       | 9       |
| AC005837.1-vs-AC007787.1 | 0.00770  | 0.52623 | 0.32817 | 0.84382 |
|                          | 4        | 5       | 6       | 7       |
| AL596325.2-vs-AC007787.1 | 0.00121  | 0.43643 | 0.26410 | 0.72121 |
|                          | 6        | 6       | 4       | 8       |
| CFAP58-DT-vs-AC007787.1  | 0.00804  | 0.52844 | 0.32971 | 0.84693 |
|                          | 3        | 2       | 8       | 7       |
| AL691482.3-vs-AC007787.1 | 0.00597  | 0.13872 | 0.03392 | 0.56720 |
|                          | 5        | 3       | 8       | 6       |
| AL691482.3-vs-AC007952.9 | 0.00583  | 0.05947 | 0.008   | 0.44220 |
|                          | 1        | 8       |         | 9       |
| AC007608.1-vs-AC007991.3 | 0.00380  | 1.50819 | 1.14183 | 1.99208 |
|                          | 1        | 1       | 9       | 4       |
| AC092198.1-vs-AC008103.1 | 0.0018   | 0.47133 | 0.29390 | 0.75588 |
|                          |          | 3       | 3       |         |
| AL691482.3-vs-AC008103.1 | 0.00583  | 0.05947 | 0.008   | 0.44220 |
|                          | 1        | 8       |         | 9       |
| AL691482.3-vs-AC008115.2 | 4.95E-05 | 0.17665 | 0.07647 | 0.40808 |
|                          |          | 6       | 2       | 8       |
| AL691482.3-vs-AC008738.6 | 0.00583  | 0.05947 | 0.008   | 0.44220 |
|                          | 1        | 8       |         | 9       |
| ARLNC1-vs-AC008738.6     | 0.00114  | 0.46193 | 0.29002 | 0.73575 |
|                          | 5        | 9       | 7       |         |
| AC092198.1-vs-AC008739.1 | 0.00285  | 0.48700 | 0.30353 | 0.78136 |
|                          | 6        | 5       | 8       | 4       |
| AL691482.3-vs-AC008739.1 | 0.00583  | 0.05947 | 0.008   | 0.44220 |
|                          | 1        | 8       |         | 9       |
| ARLNC1-vs-AC008739.1     | 0.00638  | 0.46542 | 0.26861 | 0.80642 |
|                          | 9        | 1       | 4       | 5       |
| AC092198.1-vs-AC009396.3 | 0.00059  | 0.42716 | 0.26293 | 0.69394 |
|                          | 1        |         | 9       | 6       |
| AC092198.1-vs-AC010132.1 | 6.50E-05 | 0.39611 | 0.25145 | 0.62400 |

|                          |          |         |         |         |
|--------------------------|----------|---------|---------|---------|
|                          |          | 4       | 1       | 3       |
| LINC02352-vs-AC010132.1  | 0.00023  | 0.06693 | 0.01585 | 0.28257 |
|                          | 3        | 9       | 7       | 2       |
| AC097532.2-vs-AC010132.1 | 0.00593  | 0.36827 | 0.18076 | 0.75028 |
|                          | 7        | 2       | 4       | 4       |
| AC016831.5-vs-AC010132.1 | 0.00404  | 0.46049 | 0.27138 | 0.78138 |
|                          | 8        | 2       | 2       |         |
| MATN1-AS1-vs-AC010333.3  | 0.00021  | 0.11135 | 0.03476 | 0.35663 |
|                          | 9        | 3       | 8       | 3       |
| AL391845.1-vs-AC010333.3 | 0.00843  | 0.67212 | 0.50011 | 0.90330 |
|                          | 4        | 7       | 2       | 9       |
| LINC02352-vs-AC010333.3  | 0.00011  | 0.10204 | 0.03202 | 0.32517 |
|                          | 3        | 8       | 5       |         |
| AL512625.1-vs-AC010333.3 | 1.13E-05 | 0.00435 | 0.00038 | 0.04932 |
|                          |          | 9       | 5       | 3       |
| AC010894.3-vs-AC010333.3 | 0.00849  | 0.68871 | 0.52170 | 0.90918 |
|                          | 2        | 2       | 2       | 7       |
| MCPH1-AS1-vs-AC010333.3  | 1.13E-05 | 0.00435 | 0.00038 | 0.04932 |
|                          |          | 9       | 5       | 3       |
| MRV1-AS1-vs-AC010333.3   | 0.00268  | 0.50737 | 0.32576 | 0.79024 |
|                          | 9        | 8       | 1       | 9       |
| AL691482.3-vs-AC010745.1 | 0.00583  | 0.05947 | 0.008   | 0.44220 |
|                          | 1        | 8       |         | 9       |
| AC048344.4-vs-AC010974.1 | 0.00999  | 0.30611 | 0.12436 | 0.75345 |
|                          | 6        | 6       | 9       | 6       |
| AC004596.1-vs-AC010974.1 | 0.00471  | 1.91937 | 1.22116 | 3.01680 |
|                          | 4        | 9       | 3       | 9       |
| AL133215.3-vs-AC012038.2 | 0.00798  | 0.68577 | 0.51898 | 0.90618 |
|                          | 3        | 9       | 1       | 5       |
| AC092198.1-vs-AC012150.1 | 0.00335  | 0.63228 | 0.46547 | 0.85886 |
|                          | 1        | 3       | 4       | 9       |
| AC097634.3-vs-AC012150.1 | 0.00335  | 0.50881 | 0.32393 | 0.79920 |
|                          | 9        |         | 1       | 6       |
| AC027130.1-vs-AC012150.1 | 0.00342  | 0.65234 | 0.49003 | 0.86841 |
|                          | 8        | 3       | 4       | 2       |
| AP001094.3-vs-AC012150.1 | 0.00972  | 0.67829 | 0.50538 | 0.91037 |
|                          | 6        | 8       | 6       | 1       |
| AC097532.2-vs-AC012150.1 | 0.00020  | 0.43030 | 0.27570 | 0.67161 |
|                          | 5        | 7       | 2       |         |
| AL133215.3-vs-AC012531.1 | 0.00042  | 0.60884 | 0.462   | 0.80235 |
|                          | 5        |         |         |         |
| PRR34-vs-AC012531.1      | 0.00611  | 0.60567 | 0.42321 | 0.86680 |
|                          | 6        | 8       | 6       | 5       |
| BMS1P4-vs-AC012531.1     | 0.00574  | 0.58032 | 0.39443 | 0.85383 |

---

|                          |         |         |         |         |
|--------------------------|---------|---------|---------|---------|
|                          | 4       | 7       | 2       | 4       |
| AL596325.2-vs-AC012531.1 | 0.00605 | 0.56786 | 0.37909 | 0.85063 |
|                          | 9       | 3       |         | 8       |
| AP001094.3-vs-AC012531.1 | 0.00992 | 0.69764 | 0.53061 | 0.91725 |
|                          | 3       | 3       | 2       | 5       |
| LINC00449-vs-AC012531.1  | 0.00079 | 0.51149 | 0.34575 | 0.75668 |
|                          | 3       | 2       |         | 4       |
| AC106037.2-vs-AC012531.1 | 0.00292 | 0.67035 | 0.5151  | 0.87241 |
|                          | 6       | 8       |         | 2       |
| AC025154.2-vs-AC012531.1 | 0.00984 | 0.26969 | 0.09970 | 0.72953 |
|                          | 9       | 5       | 2       | 1       |
| LINC02352-vs-AC013799.1  | 0.00151 | 0.19826 | 0.07292 | 0.53902 |
|                          | 9       | 9       | 9       | 8       |
| AC129507.1-vs-AC015909.2 | 0.00414 | 0.61104 | 0.43635 | 0.85567 |
|                          | 1       | 9       | 6       | 9       |
| AC048344.4-vs-AC019211.1 | 0.00748 | 0.14516 | 0.03529 | 0.5971  |
|                          | 1       | 2       |         |         |
| PRR34-AS1-vs-AC019211.1  | 0.00583 | 0.05947 | 0.008   | 0.44220 |
|                          | 1       | 8       |         | 9       |
| AC092198.1-vs-AC020743.2 | 0.00040 | 0.41666 | 0.25647 | 0.67690 |
|                          | 6       | 6       | 7       | 5       |
| LINC00884-vs-AC020743.2  | 0.00500 | 0.05636 | 0.00756 | 0.42003 |
|                          | 9       | 8       | 5       | 7       |
| AL691482.3-vs-AC020743.2 | 0.00583 | 0.05947 | 0.008   | 0.44220 |
|                          | 1       | 8       |         | 9       |
| ARLNC1-vs-AC020743.2     | 0.00752 | 0.46036 | 0.26063 | 0.81312 |
|                          | 4       |         | 8       | 5       |
| AC092198.1-vs-AC021134.1 | 0.00078 | 0.50527 | 0.33916 | 0.75273 |
|                          | 9       | 6       | 8       | 5       |
| AL691482.3-vs-AC021134.1 | 0.00755 | 0.20803 | 0.06574 | 0.65832 |
|                          | 7       | 6       | 2       |         |
| LINC00884-vs-AC022031.2  | 0.00774 | 0.52618 | 0.32800 | 0.84410 |
|                          | 9       | 2       | 2       | 2       |
| AC092198.1-vs-AC022166.1 | 0.00041 | 0.44946 | 0.28844 | 0.70035 |
|                          |         | 1       | 8       | 3       |
| AC097532.2-vs-AC022166.1 | 0.00783 | 0.38074 | 0.18686 | 0.77578 |
|                          | 5       | 6       | 6       | 5       |
| ARLNC1-vs-AC022166.1     | 0.00962 | 0.51735 | 0.31413 | 0.85202 |
|                          | 3       |         | 6       | 2       |
| AC092198.1-vs-AC022916.4 | 0.00221 | 0.49388 | 0.31431 | 0.77603 |
|                          | 6       | 2       | 6       | 3       |
| AL691482.3-vs-AC022916.4 | 0.00583 | 0.05947 | 0.008   | 0.44220 |
|                          | 1       | 8       |         | 9       |
| AC135050.5-vs-AC023794.1 | 0.00391 | 0.26620 | 0.10832 | 0.65418 |

---

---

|                          |          |         |         |         |
|--------------------------|----------|---------|---------|---------|
|                          | 4        | 8       | 8       | 6       |
| AL512625.1-vs-AC023824.5 | 0.00253  | 0.30730 | 0.14286 | 0.66102 |
|                          | 4        | 6       | 3       | 9       |
| AP001094.3-vs-AC023824.5 | 0.00663  | 0.6746  | 0.50771 | 0.89634 |
|                          | 5        |         | 1       | 6       |
| MRVI1-AS1-vs-AC023824.5  | 0.00130  | 0.55870 | 0.39183 | 0.79664 |
|                          | 1        | 6       | 2       | 9       |
| ARLNC1-vs-AC023824.5     | 0.00877  | 0.66593 | 0.49134 | 0.90255 |
|                          |          | 2       | 6       | 3       |
| AC092198.1-vs-AC027343.3 | 0.00323  | 0.49203 | 0.30690 | 0.78886 |
|                          | 3        | 9       | 1       | 1       |
| AC141930.1-vs-AC060766.6 | 0.00290  | 1.49514 | 1.14735 | 1.94835 |
|                          | 6        | 3       | 3       | 5       |
| AC092198.1-vs-AC063977.3 | 0.00107  | 0.43587 | 0.26501 | 0.71688 |
|                          | 1        | 5       | 9       |         |
| AL691482.3-vs-AC063977.3 | 0.00583  | 0.05947 | 0.008   | 0.44220 |
|                          | 1        | 8       |         | 9       |
| FAM66B-vs-AC069029.1     | 0.00418  | 1.59359 | 1.15848 | 2.19211 |
|                          | 1        |         | 5       | 1       |
| MIR924HG-vs-AC069234.5   | 0.00663  | 0.64076 | 0.46465 | 0.88363 |
|                          | 9        | 6       |         | 3       |
| AP001094.3-vs-AC069277.1 | 0.00606  | 0.68934 | 0.52849 | 0.89915 |
|                          | 8        | 9       | 9       | 2       |
| AL691482.3-vs-AC069277.1 | 0.00012  | 0.29550 | 0.15873 | 0.55013 |
|                          | 1        | 8       | 4       | 5       |
| AC092198.1-vs-AC069366.2 | 0.00180  | 0.63078 | 0.47223 | 0.84255 |
|                          | 9        | 1       | 5       | 5       |
| AC048344.4-vs-AC069366.2 | 0.00358  | 0.12278 | 0.02993 | 0.50365 |
|                          | 7        |         | 1       | 2       |
| AL024498.1-vs-AC069366.2 | 0.00022  | 0.06775 | 0.01621 | 0.28321 |
|                          | 5        | 8       | 1       | 6       |
| AL691482.3-vs-AC069366.2 | 0.00597  | 0.13872 | 0.03392 | 0.56720 |
|                          | 5        | 3       | 8       | 6       |
| AL691482.3-vs-AC074050.4 | 0.00411  | 0.30003 | 0.13183 | 0.68281 |
|                          | 4        | 3       | 6       | 8       |
| AL691482.3-vs-AC080013.5 | 0.00521  | 0.47085 | 0.27759 | 0.79868 |
|                          |          | 7       |         | 1       |
| AC113143.1-vs-AC084346.1 | 0.00911  | 0.60240 | 0.41156 | 0.88172 |
|                          | 9        | 4       | 8       | 8       |
| AC135050.5-vs-AC084346.1 | 5.95E-05 | 0.26674 | 0.13992 | 0.50848 |
|                          |          | 4       | 9       | 8       |
| AC097532.2-vs-AC090377.1 | 0.00999  | 0.39240 | 0.19259 | 0.79951 |
|                          |          | 6       | 6       | 1       |
| AC141930.1-vs-AC090772.3 | 0.00722  | 1.43591 | 1.10276 | 1.86972 |

---

|                          |          |         |         |         |
|--------------------------|----------|---------|---------|---------|
|                          | 7        | 7       | 1       | 3       |
| AC135050.5-vs-AC092868.2 | 0.00359  | 0.29578 | 0.13026 | 0.67161 |
|                          | 8        | 2       | 5       |         |
| AC012435.3-vs-AC093843.1 | 0.00869  | 0.63132 | 0.44776 | 0.89014 |
|                          | 4        | 7       | 2       | 5       |
| AL391845.1-vs-AC093843.1 | 0.00391  | 0.67263 | 0.51377 | 0.88060 |
|                          | 5        | 3       | 8       | 4       |
| AL353693.1-vs-AC093843.1 | 0.00427  | 0.67615 | 0.51696 | 0.88438 |
|                          | 7        | 9       | 2       | 1       |
| MMP25-AS1-vs-AC093843.1  | 0.00021  | 0.06835 | 0.01649 | 0.28328 |
|                          | 7        | 3       | 3       | 2       |
| AC004596.1-vs-AC096586.2 | 0.00882  | 1.42287 | 1.09278 | 1.85265 |
|                          | 3        |         | 6       | 7       |
| AC006435.2-vs-AC096708.2 | 0.00265  | 0.17026 | 0.05365 | 0.54034 |
|                          | 9        | 9       | 3       | 9       |
| LINC02352-vs-AC096708.2  | 4.73E-06 | 0.06024 | 0.01808 | 0.20065 |
|                          |          | 4       | 8       | 3       |
| BMS1P4-vs-AC096708.2     | 0.00466  | 0.33144 | 0.15423 | 0.71228 |
|                          | 6        | 7       | 3       | 1       |
| AL512625.1-vs-AC096708.2 | 0.00500  | 0.05636 | 0.00756 | 0.42003 |
|                          | 9        | 8       | 5       | 7       |
| AL024498.1-vs-AC096708.2 | 0.00500  | 0.05636 | 0.00756 | 0.42003 |
|                          | 9        | 8       | 5       | 7       |
| AC006538.1-vs-AC097532.2 | 0.00568  | 1.47760 | 1.12045 | 1.94858 |
|                          | 1        | 3       | 9       | 7       |
| LINC00562-vs-AC097625.1  | 0.00798  | 1.43294 | 1.09847 | 1.86923 |
|                          | 9        |         | 9       | 7       |
| LINC00937-vs-AC097625.1  | 0.00749  | 1.48651 | 1.11168 | 1.98771 |
|                          | 1        | 2       | 7       | 7       |
| AC092198.1-vs-AC098850.2 | 0.00420  | 0.49371 | 0.30448 | 0.80053 |
|                          | 8        | 5       | 9       | 7       |
| AL691482.3-vs-AC098850.2 | 0.00583  | 0.05947 | 0.008   | 0.44220 |
|                          | 1        | 8       |         | 9       |
| AC092198.1-vs-AC099684.3 | 0.00039  | 0.44139 | 0.28074 | 0.69398 |
|                          | 7        | 6       | 2       | 3       |
| AL691482.3-vs-AC099684.3 | 0.00583  | 0.05947 | 0.008   | 0.44220 |
|                          | 1        | 8       |         | 9       |
| ARLNC1-vs-AC099684.3     | 0.00134  | 0.43976 | 0.26618 | 0.72651 |
|                          |          | 1       | 9       | 5       |
| AL391845.1-vs-AC103858.1 | 0.00656  | 0.69477 | 0.53432 | 0.90341 |
|                          | 6        | 7       |         | 7       |
| AC090229.1-vs-AC103925.1 | 0.00848  | 0.48035 | 0.27826 | 0.82920 |
|                          |          |         | 1       | 6       |
| LINC02352-vs-AC103925.1  | 0.00251  | 0.21502 | 0.07935 | 0.58266 |

---

|                          |          |         |         |         |
|--------------------------|----------|---------|---------|---------|
|                          | 2        | 3       |         | 6       |
| AC048344.4-vs-AC103925.1 | 0.00748  | 0.14516 | 0.03529 | 0.5971  |
|                          | 1        | 2       |         |         |
| AC005837.1-vs-AC103925.1 | 0.00197  | 0.32428 | 0.15890 | 0.66178 |
|                          | 3        | 4       | 4       | 3       |
| ZNF433-AS1-vs-AC103925.1 | 0.00176  | 0.10356 | 0.02501 | 0.42883 |
|                          | 1        | 7       | 2       | 8       |
| LINC00884-vs-AC103925.1  | 0.00735  | 0.32685 | 0.14428 | 0.74043 |
|                          | 6        | 8       | 9       | 4       |
| AL691482.3-vs-AC103925.1 | 0.00982  | 0.26946 | 0.09958 | 0.72913 |
|                          | 5        |         | 2       | 7       |
| AC097532.2-vs-AC103925.1 | 3.92E-05 | 0.35689 | 0.21840 | 0.58317 |
|                          |          |         | 9       | 5       |
| AC025154.2-vs-AC103925.1 | 0.00583  | 0.05947 | 0.008   | 0.44220 |
|                          | 1        | 8       |         | 9       |
| AP001107.1-vs-AC103925.1 | 0.00151  | 0.10077 | 0.02440 | 0.41618 |
|                          | 7        | 8       | 3       | 4       |
| AC004076.2-vs-AC103925.1 | 0.00385  | 0.12294 | 0.02967 | 0.50937 |
|                          | 1        | 7       | 5       | 4       |
| PRR34-AS1-vs-AC103925.1  | 0.00151  | 0.10077 | 0.02440 | 0.41618 |
|                          | 7        | 8       | 3       | 4       |
| AC010531.6-vs-AC104411.1 | 0.00552  | 0.64754 | 0.47637 | 0.88022 |
|                          | 8        | 5       | 4       |         |
| AC090229.1-vs-AC104462.1 | 0.00175  | 0.64746 | 0.49315 | 0.85006 |
|                          | 1        | 3       | 1       |         |
| AC097634.3-vs-AC104462.1 | 0.00515  | 0.63594 | 0.46309 | 0.87331 |
|                          | 7        | 8       | 9       | 1       |
| AP001094.3-vs-AC104462.1 | 0.00868  | 0.70582 | 0.54411 | 0.91559 |
|                          | 7        | 6       | 4       | 8       |
| AC106037.2-vs-AC104462.1 | 0.00461  | 0.68582 | 0.52830 | 0.89030 |
|                          | 6        | 3       | 5       | 5       |
| AC092198.1-vs-AC104462.2 | 0.00154  | 0.60871 | 0.44769 | 0.82763 |
|                          | 1        | 2       | 9       | 3       |
| AC090229.1-vs-AC104462.2 | 0.00876  | 0.61233 | 0.42434 | 0.88362 |
|                          | 4        | 9       | 1       | 7       |
| AC010531.6-vs-AC104462.2 | 0.00606  | 0.20028 | 0.06352 | 0.63151 |
|                          | 2        | 5       |         | 7       |
| AL391845.1-vs-AC104462.2 | 0.00565  | 0.66502 | 0.49812 | 0.88783 |
|                          | 9        | 3       | 8       | 6       |
| AP003717.1-vs-AC104462.2 | 0.00943  | 0.47483 | 0.27059 | 0.83321 |
|                          | 3        | 3       | 9       | 3       |
| AC092868.2-vs-AC104462.2 | 0.00199  | 0.61818 | 0.45571 | 0.83858 |
|                          | 1        | 9       | 9       | 4       |
| AC027130.1-vs-AC104462.2 | 0.00039  | 0.60409 | 0.45718 | 0.79820 |

---

|                           |          |         |         |         |
|---------------------------|----------|---------|---------|---------|
|                           | 2        | 1       |         | 9       |
| AP001094.3-vs-AC104462.2  | 0.00884  | 0.68160 | 0.51157 | 0.90815 |
|                           | 5        | 7       | 3       | 5       |
| AC010894.3-vs-AC104462.2  | 0.00152  | 0.63590 | 0.48069 | 0.84124 |
|                           |          | 7       | 1       | 5       |
| LINC00449-vs-AC104462.2   | 0.00367  | 0.49348 | 0.30643 | 0.79472 |
|                           | 2        | 9       | 6       | 1       |
| LINC00884-vs-AC104462.2   | 0.00034  | 0.19444 | 0.07937 | 0.47635 |
|                           | 1        | 6       | 2       | 3       |
| LINC02397-vs-AC104462.2   | 0.00862  | 0.70106 | 0.53786 | 0.91378 |
|                           |          | 3       |         | 7       |
| LURAP1L-AS1-vs-AC104462.2 | 0.00625  | 0.69656 | 0.53750 | 0.90269 |
|                           | 8        | 5       | 3       | 9       |
| LINC00937-vs-AC104462.2   | 0.00806  | 0.56337 | 0.36849 | 0.86130 |
|                           | 6        |         | 2       | 9       |
| SLC12A5-AS1-vs-AC104462.2 | 0.00136  | 0.42204 | 0.24893 | 0.71552 |
|                           | 1        | 7       | 9       | 9       |
| AC106037.2-vs-AC104462.2  | 2.66E-05 | 0.56105 | 0.42844 | 0.73470 |
|                           |          | 3       | 6       | 3       |
| AL691482.3-vs-AC104462.2  | 0.00597  | 0.13872 | 0.03392 | 0.56720 |
|                           | 5        | 3       | 8       | 6       |
| AC097532.2-vs-AC104462.2  | 0.00058  | 0.54066 | 0.38083 | 0.76758 |
|                           | 3        | 6       | 3       | 2       |
| AC116913.1-vs-AC104462.2  | 0.00018  | 0.10791 | 0.03358 | 0.34677 |
|                           | 5        | 8       | 5       | 6       |
| AC016831.5-vs-AC104462.2  | 0.00635  | 0.59759 | 0.41286 | 0.86498 |
|                           | 8        | 6       | 6       | 1       |
| AC145343.1-vs-AC104462.2  | 9.01E-06 | 0.09677 | 0.03451 | 0.27133 |
|                           |          | 3       | 5       | 1       |
| AC004076.2-vs-AC104462.2  | 0.00049  | 0.25890 | 0.12106 | 0.55366 |
|                           | 3        | 2       | 6       | 4       |
| AC023794.1-vs-AC104462.2  | 0.00375  | 0.60872 | 0.43512 | 0.85158 |
|                           | 8        | 8       | 7       | 9       |
| AC012531.1-vs-AC104462.2  | 0.00630  | 0.67877 | 0.51401 | 0.89635 |
|                           | 9        | 9       | 6       | 5       |
| AL390208.1-vs-AC104462.2  | 0.00867  | 0.51376 | 0.31244 | 0.84481 |
|                           | 7        | 4       | 1       | 3       |
| ARLNC1-vs-AC104462.2      | 0.00167  | 0.60814 | 0.44593 | 0.82935 |
|                           | 8        | 3       | 3       | 8       |
| FAM30A-vs-AC104462.2      | 0.00346  | 0.64448 | 0.48007 | 0.86520 |
|                           | 1        | 2       |         | 1       |
| TTN-AS1-vs-AC106037.2     | 0.00652  | 1.50556 | 1.12114 | 2.02178 |
|                           | 5        | 2       | 6       | 5       |
| MAFA-AS1-vs-AC106037.2    | 0.00466  | 1.47421 | 1.12668 | 1.92893 |



|                                      |          |         |         |         |
|--------------------------------------|----------|---------|---------|---------|
|                                      | 2        |         | 2       | 4       |
| BMS1P4-vs-AC106037.2                 | 0.00335  | 1.54800 | 1.15605 | 2.07284 |
|                                      | 2        | 3       |         | 6       |
| AC006538.1-vs-AC106037.2             | 0.00490  | 1.55483 | 1.14323 | 2.11463 |
|                                      | 6        | 5       | 1       | 2       |
| AL691482.3-vs-AC106037.2             | 0.00393  | 0.29855 | 0.13125 | 0.67906 |
|                                      | 8        | 2       | 9       | 6       |
| ATP6V1B1-AS1-vs-AC106037.2           | 0.00282  | 1.50816 | 1.15165 | 1.97504 |
|                                      | 6        | 6       | 1       | 5       |
| PRR34-AS1-vs-AC112236.2              | 8.83E-05 | 0.16308 | 0.06587 | 0.40375 |
|                                      |          | 5       | 3       | 9       |
| STAG3L5P-PVRIG2P-PILRB-vs-AC113143.1 | 0.00216  | 1.53190 | 1.16635 | 2.01202 |
|                                      | 8        | 7       | 5       | 9       |
| AL162377.1-vs-AC113143.1             | 0.00754  | 1.54757 | 1.12338 | 2.13191 |
|                                      | 3        |         | 9       | 7       |
| PRR34-AS1-vs-AC113404.1              | 0.00583  | 0.05947 | 0.008   | 0.44220 |
|                                      | 1        | 8       |         | 9       |
| AC090772.3-vs-AC116025.2             | 0.00622  | 0.58751 | 0.40137 | 0.85998 |
|                                      | 1        | 8       | 4       | 9       |
| AC135050.5-vs-AC116025.2             | 0.00034  | 0.22282 | 0.09789 | 0.50718 |
|                                      | 7        | 1       | 3       | 3       |
| AC006435.2-vs-AC116447.1             | 0.00065  | 0.58914 | 0.43455 | 0.79873 |
|                                      | 6        | 7       | 7       | 2       |
| AC097634.3-vs-AC116616.1             | 0.00733  | 0.43334 | 0.23516 | 0.79852 |
|                                      | 1        | 1       | 5       | 3       |
| AC092868.2-vs-AC116616.1             | 0.00762  | 0.64057 | 0.46181 | 0.88850 |
|                                      | 8        | 1       | 9       | 9       |
| AC106037.2-vs-AC116616.1             | 0.00703  | 0.67394 | 0.50580 | 0.89796 |
|                                      | 9        | 1       | 7       | 4       |
| AL390208.1-vs-AC116616.1             | 0.00373  | 0.42016 | 0.23382 | 0.75499 |
|                                      | 3        | 5       | 8       | 2       |
| ARLNC1-vs-AC116616.1                 | 0.00061  | 0.47291 | 0.30816 | 0.72573 |
|                                      |          | 2       | 5       | 5       |
| AC010531.6-vs-AC118344.1             | 0.00093  | 0.56170 | 0.39913 | 0.79047 |
|                                      | 7        | 3       | 8       | 8       |
| LINC02352-vs-AC118754.2              | 0.00255  | 0.37375 | 0.19721 | 0.70833 |
|                                      | 2        | 5       | 4       | 2       |
| AL512625.1-vs-AC118754.2             | 0.00022  | 0.34188 | 0.19343 | 0.60423 |
|                                      | 1        | 1       | 9       | 5       |
| AL596325.2-vs-AC118754.2             | 0.00232  | 0.54892 | 0.37315 | 0.80747 |
|                                      |          | 3       | 8       | 7       |
| CFAP58-DT-vs-AC118754.2              | 0.00207  | 0.48393 | 0.30487 | 0.76818 |
|                                      | 9        | 9       | 3       |         |
| MCPH1-AS1-vs-AC118754.2              | 1.31E-05 | 0.23441 | 0.12207 | 0.45012 |

---

|                          |         |         |         |         |
|--------------------------|---------|---------|---------|---------|
|                          |         | 1       | 4       | 8       |
| AC106037.2-vs-AC118754.2 | 0.00128 | 0.64741 | 0.49685 | 0.84359 |
|                          | 4       | 4       | 7       | 2       |
| AL691482.3-vs-AC118754.2 | 0.00080 | 0.21252 | 0.08593 | 0.52561 |
|                          | 2       | 6       | 2       | 2       |
| AC116913.1-vs-AC118754.2 | 0.00866 | 0.30326 | 0.12442 | 0.73912 |
|                          | 4       | 3       | 9       | 3       |
| AC092868.2-vs-AC120193.1 | 0.00309 | 0.62059 | 0.45241 | 0.8513  |
|                          | 4       | 9       | 7       |         |
| LINC02352-vs-AC120193.1  | 0.00479 | 0.23843 | 0.08804 | 0.64572 |
|                          | 6       | 1       |         |         |
| AC097634.3-vs-AC134775.1 | 0.00657 | 0.62935 | 0.45066 | 0.87889 |
|                          | 6       | 7       | 9       | 4       |
| AL596325.2-vs-AC134775.1 | 0.00559 | 0.59022 | 0.40646 | 0.85706 |
|                          | 9       | 9       | 7       | 9       |
| AC106037.2-vs-AC134775.1 | 0.00104 | 0.64611 | 0.49756 | 0.83900 |
|                          | 9       | 1       | 5       | 6       |
| AL691482.3-vs-AC135012.2 | 0.00583 | 0.05947 | 0.008   | 0.44220 |
|                          | 1       | 8       |         | 9       |
| AC092198.1-vs-AC135776.2 | 0.00711 | 0.50582 | 0.30791 | 0.83094 |
|                          | 9       | 5       | 4       | 1       |
| AL691482.3-vs-AC135776.2 | 0.00583 | 0.05947 | 0.008   | 0.44220 |
|                          | 1       | 8       |         | 9       |
| AC092198.1-vs-AC137579.2 | 0.00135 | 0.49801 | 0.32511 | 0.76287 |
|                          | 6       | 7       | 2       | 8       |
| AL691482.3-vs-AC137579.2 | 0.00583 | 0.05947 | 0.008   | 0.44220 |
|                          | 1       | 8       |         | 9       |
| AC097532.2-vs-AC137579.2 | 0.00820 | 0.42311 | 0.22361 | 0.80059 |
|                          | 5       | 2       | 5       |         |
| PRR34-vs-AC138028.5      | 0.00367 | 0.26714 | 0.10962 | 0.65101 |
|                          | 9       | 8       | 6       | 5       |
| AL691482.3-vs-AC138028.5 | 0.00583 | 0.05947 | 0.008   | 0.44220 |
|                          | 1       | 8       |         | 9       |
| AL691482.3-vs-AC138907.7 | 0.00583 | 0.05947 | 0.008   | 0.44220 |
|                          | 1       | 8       |         | 9       |
| ARLNC1-vs-AC138907.7     | 0.00773 | 0.46160 | 0.26134 | 0.81532 |
|                          | 6       | 5       | 3       | 4       |
| AC010531.6-vs-AC138956.1 | 0.00694 | 0.66676 | 0.49679 | 0.89488 |
|                          | 1       | 3       | 2       | 6       |
| LINC02352-vs-AC139497.1  | 0.00879 | 0.15234 | 0.03727 | 0.62253 |
|                          | 7       |         | 9       | 9       |
| AL691482.3-vs-AC139497.1 | 0.00583 | 0.05947 | 0.008   | 0.44220 |
|                          | 1       | 8       |         | 9       |
| AC010531.6-vs-AC141930.1 | 0.00035 | 0.59814 | 0.45115 | 0.79300 |

---

|                          |          |         |         |         |
|--------------------------|----------|---------|---------|---------|
|                          | 4        |         | 9       | 6       |
| TBX2-AS1-vs-AC141930.1   | 0.00349  | 0.65130 | 0.48844 | 0.86846 |
|                          | 4        | 4       | 4       | 6       |
| AC025154.2-vs-AC141930.1 | 0.00562  | 0.62192 | 0.44436 | 0.87043 |
|                          | 4        | 5       | 4       | 7       |
| AL691482.3-vs-AC145350.2 | 0.00583  | 0.05947 | 0.008   | 0.44220 |
|                          | 1        | 8       |         | 9       |
| AC092868.2-vs-AC254562.2 | 0.00305  | 0.65861 | 0.49958 | 0.86826 |
|                          | 8        | 1       | 2       | 2       |
| AC027130.1-vs-AC254562.2 | 0.00336  | 0.67589 | 0.52021 | 0.87817 |
|                          | 2        | 6       |         | 5       |
| AP001094.3-vs-AC254562.2 | 0.00725  | 0.69092 | 0.52750 | 0.90498 |
|                          | 2        | 6       | 2       | 1       |
| LINC00449-vs-AC254562.2  | 0.00172  | 0.54668 | 0.37476 | 0.79748 |
|                          | 1        | 9       | 6       |         |
| AC138956.1-vs-AL117382.1 | 0.00425  | 0.43872 | 0.24938 | 0.77182 |
|                          | 5        | 3       | 2       |         |
| AL691482.3-vs-AL117382.1 | 0.00799  | 0.25974 | 0.09593 | 0.70331 |
|                          |          | 7       |         | 3       |
| AC010531.6-vs-AL121672.3 | 9.35E-05 | 0.16653 | 0.06775 | 0.40929 |
|                          |          | 2       | 7       | 9       |
| AL691482.3-vs-AL133215.3 | 0.00183  | 0.31910 | 0.15556 | 0.65453 |
|                          | 2        | 1       | 9       | 5       |
| PRR34-AS1-vs-AL133215.3  | 0.00129  | 0.19187 | 0.07017 | 0.52467 |
|                          | 7        | 7       | 1       | 2       |
| AC092868.2-vs-AL135934.1 | 0.00541  | 0.62375 | 0.44725 | 0.86991 |
|                          | 8        | 7       | 3       | 8       |
| AL691482.3-vs-AL135934.1 | 0.00583  | 0.05947 | 0.008   | 0.44220 |
|                          | 1        | 8       |         | 9       |
| AC092198.1-vs-AL139350.1 | 0.00017  | 0.41258 | 0.25970 | 0.65546 |
|                          | 8        | 8       | 8       | 2       |
| AL691482.3-vs-AL139350.1 | 0.00583  | 0.05947 | 0.008   | 0.44220 |
|                          | 1        | 8       |         | 9       |
| LINC00884-vs-AL160270.1  | 0.00662  | 0.14199 | 0.03470 | 0.58101 |
|                          | 2        | 8       | 4       | 6       |
| AL691482.3-vs-AL160270.1 | 0.00785  | 0.20747 | 0.06507 | 0.66153 |
|                          | 2        | 8       | 2       | 3       |
| AL691482.3-vs-AL356309.2 | 0.00325  | 0.17643 | 0.05556 | 0.56022 |
|                          | 2        | 8       | 8       | 3       |
| AC141930.1-vs-AL359881.2 | 0.00346  | 1.54417 | 1.15394 | 2.06637 |
|                          | 3        | 4       |         | 6       |
| AC092198.1-vs-AL360091.2 | 0.00788  | 0.65529 | 0.47975 | 0.89506 |
|                          | 9        | 4       | 4       | 5       |
| AL391845.1-vs-AL360091.2 | 0.00055  | 0.59333 | 0.44109 | 0.79811 |

|                           |         |         |         |         |
|---------------------------|---------|---------|---------|---------|
|                           | 9       |         | 2       | 2       |
| AC006435.2-vs-AL360091.2  | 0.00339 | 0.12126 | 0.02956 | 0.49743 |
|                           | 4       | 8       | 3       | 8       |
| AC097634.3-vs-AL360091.2  | 0.00148 | 0.42195 | 0.24785 | 0.71835 |
|                           |         | 9       | 6       | 7       |
| AL512625.1-vs-AL360091.2  | 0.00500 | 0.05636 | 0.00756 | 0.42003 |
|                           | 9       | 8       | 5       | 7       |
| MRVI1-AS1-vs-AL360091.2   | 0.00694 | 0.57768 | 0.38785 | 0.86042 |
|                           | 4       | 8       | 8       | 6       |
| AL024498.1-vs-AL360091.2  | 0.00500 | 0.05636 | 0.00756 | 0.42003 |
|                           | 9       | 8       | 5       | 7       |
| SLC12A5-AS1-vs-AL360091.2 | 0.00438 | 0.32913 | 0.15324 | 0.70689 |
|                           | 1       | 6       | 9       | 4       |
| AC145343.1-vs-AL360091.2  | 0.00500 | 0.05636 | 0.00756 | 0.42003 |
|                           | 9       | 8       | 5       | 7       |
| LINC02352-vs-AL390061.1   | 0.00522 | 0.19138 | 0.05998 | 0.61067 |
|                           | 1       | 9       | 3       | 1       |
| AL691482.3-vs-AL390061.1  | 0.00082 | 0.17959 | 0.06564 | 0.49138 |
|                           | 7       | 5       |         | 2       |
| AC092198.1-vs-AL391422.3  | 0.00600 | 0.57743 | 0.39025 | 0.85438 |
|                           | 9       | 2       | 7       | 2       |
| AL691482.3-vs-AL391422.3  | 0.00583 | 0.05947 | 0.008   | 0.44220 |
|                           | 1       | 8       |         | 9       |
| MAFA-AS1-vs-AL391845.1    | 0.00058 | 1.59241 | 1.22151 | 2.07594 |
|                           | 4       | 7       | 1       | 7       |
| AC138956.1-vs-AL445489.1  | 0.00815 | 0.43852 | 0.23809 | 0.80766 |
|                           | 8       | 6       | 9       | 6       |
| AC090229.1-vs-AL445489.1  | 0.00191 | 0.59298 | 0.42624 | 0.82494 |
|                           | 9       | 4       | 9       |         |
| AC092868.2-vs-AL445489.1  | 0.00603 | 0.66619 | 0.49852 | 0.89025 |
|                           | 7       | 3       | 2       | 8       |
| AC027130.1-vs-AL445489.1  | 0.00791 | 0.69874 | 0.53632 | 0.91035 |
|                           | 3       | 4       |         | 7       |
| AP001094.3-vs-AL445489.1  | 0.00421 | 0.66346 | 0.50091 | 0.87876 |
|                           | 9       | 8       | 8       | 6       |
| MRVI1-AS1-vs-AL445489.1   | 0.00419 | 0.60814 | 0.43266 | 0.8548  |
|                           | 4       | 9       | 9       |         |
| AC106037.2-vs-AL445489.1  | 0.00707 | 0.68903 | 0.52543 | 0.90356 |
|                           | 6       | 4       | 9       | 3       |
| AL691482.3-vs-AL445489.1  | 0.00597 | 0.13872 | 0.03392 | 0.56720 |
|                           | 5       | 3       | 8       | 6       |
| AC116913.1-vs-AL445489.1  | 0.00106 | 0.08930 | 0.02101 | 0.37951 |
|                           | 6       | 2       | 3       | 7       |
| AC023794.1-vs-AL445489.1  | 0.00425 | 0.64852 | 0.48192 | 0.87271 |

|                          |         |         |         |         |
|--------------------------|---------|---------|---------|---------|
|                          | 4       | 3       | 3       | 8       |
| AL390208.1-vs-AL445489.1 | 0.00210 | 0.48323 | 0.30397 | 0.76821 |
|                          | 6       | 7       | 4       | 8       |
| AC025154.2-vs-AL512329.2 | 0.00237 | 0.66252 | 0.50800 | 0.86402 |
|                          | 6       |         | 8       | 8       |
| LINC00884-vs-AL513188.1  | 0.00626 | 0.28776 | 0.11780 | 0.70293 |
|                          | 6       | 7       | 6       | 7       |
| AL024498.1-vs-AL513188.1 | 0.00500 | 0.05636 | 0.00756 | 0.42003 |
|                          | 9       | 8       | 5       | 7       |
| AL691482.3-vs-AL513188.1 | 0.00597 | 0.13872 | 0.03392 | 0.56720 |
|                          | 5       | 3       | 8       | 6       |
| AC010531.6-vs-AL596325.2 | 0.00341 | 0.58986 | 0.41425 | 0.83992 |
|                          | 8       | 7       | 4       | 7       |
| MMP25-AS1-vs-AL596325.2  | 0.00269 | 0.42231 | 0.24049 | 0.74158 |
|                          | 4       | 5       | 9       | 5       |
| AC018647.2-vs-AL596325.2 | 0.00133 | 0.09667 | 0.02320 | 0.40278 |
|                          | 3       | 1       | 2       | 8       |
| AC026471.1-vs-AL606468.1 | 0.00062 | 0.08244 | 0.01974 | 0.34427 |
|                          | 1       | 4       | 3       | 5       |
| AL691482.3-vs-AL606468.1 | 0.00229 | 0.28041 | 0.12384 | 0.63492 |
|                          | 3       | 6       | 6       | 6       |
| AL162377.1-vs-AL606468.1 | 0.00096 | 0.14276 | 0.04496 | 0.45336 |
|                          | 1       | 9       |         | 1       |
| AC092198.1-vs-AL606516.1 | 0.00119 | 0.48066 | 0.30864 | 0.74857 |
|                          |         | 9       | 5       |         |
| AL691482.3-vs-AL606516.1 | 0.00583 | 0.05947 | 0.008   | 0.44220 |
|                          | 1       | 8       |         | 9       |
| LINC02352-vs-AP000873.3  | 0.00449 | 0.41311 | 0.22450 | 0.76019 |
|                          | 5       | 7       | 3       | 6       |
| AL596325.2-vs-AP000873.3 | 0.00117 | 0.52737 | 0.35829 | 0.77626 |
|                          | 8       | 7       |         |         |
| AC145343.1-vs-AP000873.3 | 0.00251 | 0.114   | 0.02787 | 0.46622 |
|                          | 3       |         | 5       | 8       |
| PRR34-AS1-vs-AP000873.3  | 0.00583 | 0.05947 | 0.008   | 0.44220 |
|                          | 1       | 8       |         | 9       |
| MAFA-AS1-vs-AP001094.3   | 0.00046 | 1.61700 | 1.23569 | 2.11598 |
|                          | 1       | 8       | 8       | 2       |
| AC112236.2-vs-AP001094.3 | 0.00371 | 1.47426 | 1.13419 | 1.91629 |
|                          | 9       | 1       | 3       | 4       |
| CR381653.1-vs-AP001094.3 | 0.0017  | 1.52284 | 1.17104 | 1.98031 |
|                          |         |         | 7       | 4       |
| AC063943.1-vs-AP001094.3 | 0.00313 | 1.65100 | 1.18380 | 2.30258 |
|                          | 5       | 4       | 9       |         |
| AC141930.1-vs-AP001094.3 | 0.00328 | 1.64167 | 1.17962 | 2.28469 |

|                            |          |         |         |         |
|----------------------------|----------|---------|---------|---------|
|                            | 6        | 5       | 8       | 9       |
| AC004596.1-vs-AP001094.3   | 0.00326  | 1.76186 | 1.20799 | 2.56969 |
|                            | 9        | 7       | 3       | 7       |
| FAM66B-vs-AP001094.3       | 0.00176  | 1.63914 | 1.20253 | 2.23426 |
|                            | 6        | 5       | 9       | 9       |
| AC097532.2-vs-AP001094.3   | 0.00901  | 1.43015 | 1.09338 | 1.87066 |
|                            | 2        | 7       |         | 8       |
| AC092868.2-vs-AP001993.1   | 0.00964  | 0.64733 | 0.46569 | 0.89981 |
|                            | 7        | 2       | 6       | 3       |
| AL691482.3-vs-AP001993.1   | 0.00583  | 0.05947 | 0.008   | 0.44220 |
|                            | 1        | 8       |         | 9       |
| TBX2-AS1-vs-AP002892.1     | 0.00036  | 0.02324 | 0.00293 | 0.18392 |
|                            | 5        | 5       | 8       | 8       |
| LINC01504-vs-AP002892.1    | 0.00842  | 0.49113 | 0.28937 | 0.83356 |
|                            | 7        | 4       | 6       |         |
| AC092198.1-vs-AP004147.1   | 0.00078  | 0.48237 | 0.31514 | 0.73834 |
|                            | 9        | 4       | 5       | 1       |
| AC092868.2-vs-AP004147.1   | 0.00917  | 0.63511 | 0.45138 | 0.89363 |
|                            | 7        | 6       | 3       | 6       |
| AL691482.3-vs-AP004147.1   | 0.00583  | 0.05947 | 0.008   | 0.44220 |
|                            | 1        | 8       |         | 9       |
| AC097532.2-vs-AP004147.1   | 0.00516  | 0.36234 | 0.17786 | 0.73813 |
|                            | 9        | 1       | 8       | 6       |
| LINC00884-vs-ASTN2-AS1     | 0.00500  | 0.05636 | 0.00756 | 0.42003 |
|                            | 9        | 8       | 5       | 7       |
| AL691482.3-vs-ASTN2-AS1    | 0.00583  | 0.05947 | 0.008   | 0.44220 |
|                            | 1        | 8       |         | 9       |
| AC026471.1-vs-ATP6V1B1-AS1 | 0.00011  | 0.05967 | 0.01430 | 0.24895 |
|                            |          | 1       | 2       | 9       |
| LINC00884-vs-BMP7-AS1      | 0.00080  | 0.36662 | 0.20381 | 0.65949 |
|                            | 9        | 7       | 4       | 9       |
| AL024498.1-vs-BMP7-AS1     | 0.00942  | 0.15299 | 0.03708 | 0.63122 |
|                            | 5        | 6       | 3       | 2       |
| AL691482.3-vs-BMP7-AS1     | 0.00722  | 0.32500 | 0.14313 | 0.73798 |
|                            | 8        | 8       | 4       | 1       |
| AC048344.4-vs-BMS1P4       | 0.00951  | 0.49837 | 0.29441 | 0.84364 |
|                            | 3        | 8       | 2       | 9       |
| CFAP58-DT-vs-BMS1P4        | 0.00859  | 0.68877 | 0.52155 | 0.90961 |
|                            | 9        | 4       |         | 4       |
| PRR34-AS1-vs-BMS1P4        | 0.00995  | 0.22051 | 0.06984 | 0.69620 |
|                            | 8        | 1       | 3       | 3       |
| AL162377.1-vs-BMS1P4       | 1.02E-05 | 0.03560 | 0.00809 | 0.15666 |
|                            |          | 5       | 2       | 9       |
| AL162377.1-vs-C22orf24     | 0.00583  | 0.05947 | 0.008   | 0.44220 |

|                            |          |         |         |         |
|----------------------------|----------|---------|---------|---------|
|                            | 1        | 8       |         | 9       |
| AC010531.6-vs-CDC42-IT1    | 0.00732  | 0.49610 | 0.29721 | 0.82808 |
|                            | 6        | 3       | 5       | 3       |
| AC092198.1-vs-CLLU1        | 0.00279  | 0.52865 | 0.34808 | 0.8029  |
|                            | 4        | 5       | 3       |         |
| AL691482.3-vs-CLLU1        | 0.00583  | 0.05947 | 0.008   | 0.44220 |
|                            | 1        | 8       |         | 9       |
| AL691482.3-vs-CR381653.1   | 0.00905  | 0.30290 | 0.12353 | 0.74270 |
|                            | 4        | 7       | 8       | 4       |
| AC092868.2-vs-CU638689.5   | 0.00848  | 0.64973 | 0.47128 | 0.89573 |
|                            | 7        | 2       | 9       | 9       |
| AL691482.3-vs-CU638689.5   | 0.00583  | 0.05947 | 0.008   | 0.44220 |
|                            | 1        | 8       |         | 9       |
| AL691482.3-vs-FOCAD-AS1    | 0.00225  | 0.24420 | 0.09885 | 0.60331 |
|                            |          | 9       |         | 8       |
| MATN1-AS1-vs-HSD17B3-AS1   | 3.03E-05 | 0.00809 | 0.00084 | 0.07784 |
|                            |          | 7       | 2       | 3       |
| AC092198.1-vs-KCNAB1-AS1   | 0.00814  | 0.60280 | 0.41433 | 0.87701 |
|                            | 5        | 6       | 1       | 5       |
| TBX2-AS1-vs-KCNAB1-AS1     | 0.00302  | 0.04728 | 0.00629 | 0.35532 |
|                            | 2        | 7       | 3       | 9       |
| AL691482.3-vs-KCNAB1-AS1   | 0.00583  | 0.05947 | 0.008   | 0.44220 |
|                            | 1        | 8       |         | 9       |
| AL691482.3-vs-KIAA2012-AS1 | 0.00823  | 0.21039 | 0.06620 | 0.66865 |
|                            | 7        | 3       | 1       |         |
| AL024498.1-vs-LINC00159    | 0.00010  | 0.01502 | 0.0018  | 0.12543 |
|                            | 6        | 4       |         | 4       |
| AL691482.3-vs-LINC00159    | 0.00381  | 0.22690 | 0.08306 | 0.61981 |
|                            | 7        | 7       | 8       | 4       |
| AC025154.2-vs-LINC00159    | 0.00754  | 0.14693 | 0.03598 | 0.59997 |
|                            | 8        | 5       | 4       | 6       |
| AC010531.6-vs-LINC00562    | 0.00895  | 0.26392 | 0.09719 | 0.71665 |
|                            | 9        | 4       | 5       | 9       |
| MATN1-AS1-vs-LINC00562     | 0.00386  | 0.35051 | 0.17211 | 0.71382 |
|                            | 5        | 6       | 7       | 5       |
| AL391845.1-vs-LINC00562    | 0.00134  | 0.65357 | 0.50393 | 0.84765 |
|                            | 6        | 8       | 8       | 2       |
| AL512625.1-vs-LINC00562    | 0.00962  | 0.48639 | 0.28186 | 0.83936 |
|                            | 6        | 9       |         | 8       |
| AP001094.3-vs-LINC00562    | 0.00793  | 0.70336 | 0.54245 | 0.91200 |
|                            | 3        | 4       | 3       | 6       |
| PRR34-AS1-vs-LINC00562     | 0.00583  | 0.05947 | 0.008   | 0.44220 |
|                            | 1        | 8       |         | 9       |
| AC092198.1-vs-LINC00681    | 0.00211  | 0.52565 | 0.34879 | 0.79219 |

|                         |          |         |         |         |
|-------------------------|----------|---------|---------|---------|
|                         | 9        | 7       | 6       | 9       |
| AL691482.3-vs-LINC00937 | 0.00212  | 0.42572 | 0.24688 | 0.73411 |
|                         | 8        | 6       | 6       | 6       |
| AC005837.1-vs-LINC01297 | 0.00449  | 1.92280 | 1.22479 | 3.01860 |
|                         | 5        | 4       | 7       | 2       |
| AC007787.1-vs-LINC01297 | 0.00338  | 1.47845 | 1.13826 | 1.92032 |
|                         | 3        | 9       | 7       | 5       |
| AC092198.1-vs-LINC01323 | 0.00029  | 0.46645 | 0.30853 | 0.70519 |
|                         | 9        | 1       | 3       | 6       |
| LINC02352-vs-LINC01323  | 7.05E-05 | 0.05334 | 0.01257 | 0.22635 |
|                         |          | 6       | 2       | 9       |
| LINC00884-vs-LINC01323  | 0.00500  | 0.05636 | 0.00756 | 0.42003 |
|                         | 9        | 8       | 5       | 7       |
| LINC00937-vs-LINC01323  | 0.00030  | 0.19193 | 0.07838 | 0.46998 |
|                         | 3        | 4       | 4       |         |
| LINC01504-vs-LINC01323  | 0.00578  | 0.19896 | 0.06320 | 0.62636 |
|                         | 9        | 8       | 3       | 4       |
| AL691482.3-vs-LINC01323 | 0.00583  | 0.05947 | 0.008   | 0.44220 |
|                         | 1        | 8       |         | 9       |
| LINC01426-vs-LINC01323  | 0.00011  | 0.09881 | 0.03054 | 0.31962 |
|                         | 1        | 3       | 8       | 5       |
| AC092198.1-vs-LINC01427 | 0.00122  | 0.44960 | 0.27691 | 0.72999 |
|                         | 6        | 2       |         | 2       |
| AL691482.3-vs-LINC01427 | 0.00583  | 0.05947 | 0.008   | 0.44220 |
|                         | 1        | 8       |         | 9       |
| AC027130.1-vs-LINC01496 | 0.00909  | 0.65516 | 0.47682 | 0.9002  |
|                         | 4        | 2       | 5       |         |
| AL691482.3-vs-LINC01496 | 0.00583  | 0.05947 | 0.008   | 0.44220 |
|                         | 1        | 8       |         | 9       |
| AC097532.2-vs-LINC01496 | 0.00213  | 0.34816 | 0.17752 | 0.68280 |
|                         | 9        |         | 7       | 3       |
| ARLNC1-vs-LINC01496     | 0.00248  | 0.45127 | 0.26948 | 0.75572 |
|                         | 9        | 8       |         | 3       |
| AL133215.3-vs-LINC01501 | 0.00412  | 0.59145 | 0.41314 | 0.84674 |
|                         | 2        | 9       | 1       | 4       |
| AL512625.1-vs-LINC01501 | 0.00855  | 0.21439 | 0.06803 | 0.67567 |
|                         | 4        | 9       | 1       | 5       |
| LINC00562-vs-LINC01525  | 0.00974  | 1.43368 | 1.09096 | 1.88406 |
|                         | 9        | 4       | 6       | 5       |
| LINC01561-vs-LINC01525  | 0.00642  | 1.45884 | 1.11185 | 1.91411 |
|                         | 8        | 5       | 9       | 8       |
| CDC42-IT1-vs-LINC01525  | 0.00998  | 1.48422 | 1.09909 | 2.00430 |
|                         | 2        | 7       | 7       | 9       |
| AC012629.2-vs-LINC01525 | 0.00823  | 1.42134 | 1.09505 | 1.84484 |



|                         |         |         |         |         |
|-------------------------|---------|---------|---------|---------|
|                         | 1       | 1       | 9       | 2       |
| AC092198.1-vs-LINC01584 | 0.00041 | 0.41735 | 0.25692 | 0.67795 |
|                         | 5       | 2       | 3       | 5       |
| AL691482.3-vs-LINC01584 | 0.00583 | 0.05947 | 0.008   | 0.44220 |
|                         | 1       | 8       |         | 9       |
| AC092198.1-vs-LINC01669 | 0.00068 | 0.44095 | 0.27484 | 0.70747 |
|                         | 7       | 8       | 2       | 4       |
| AL691482.3-vs-LINC01669 | 0.00583 | 0.05947 | 0.008   | 0.44220 |
|                         | 1       | 8       |         | 9       |
| AC092198.1-vs-LINC01689 | 0.00118 | 0.43880 | 0.26676 | 0.72180 |
|                         |         | 5       | 3       | 3       |
| AL691482.3-vs-LINC01689 | 0.00583 | 0.05947 | 0.008   | 0.44220 |
|                         | 1       | 8       |         | 9       |
| AL691482.3-vs-LINC01794 | 0.00423 | 0.12769 | 0.03116 | 0.52328 |
|                         | 8       | 7       | 2       | 7       |
| AL691482.3-vs-LINC01910 | 0.00583 | 0.05947 | 0.008   | 0.44220 |
|                         | 1       | 8       |         | 9       |
| AC092198.1-vs-LINC01987 | 0.00171 | 0.52423 | 0.35009 | 0.78500 |
|                         | 8       | 7       | 1       | 7       |
| AL691482.3-vs-LINC01987 | 0.00583 | 0.05947 | 0.008   | 0.44220 |
|                         | 1       | 8       |         | 9       |
| BMS1P4-vs-LINC02076     | 0.00524 | 1.50411 | 1.12928 | 2.00334 |
|                         | 8       | 5       | 9       | 9       |
| AC004895.1-vs-LINC02076 | 0.00070 | 1.56874 | 1.20896 | 2.03558 |
|                         | 5       | 6       | 9       | 8       |
| MORC2-AS1-vs-LINC02076  | 0.00424 | 1.46290 | 1.12714 | 1.89867 |
|                         | 1       | 4       | 6       | 9       |
| AL391845.1-vs-LINC02122 | 0.00239 | 0.63209 | 0.47008 | 0.84994 |
|                         | 7       | 6       | 3       | 5       |
| AC007406.3-vs-LINC02122 | 0.00909 | 0.42723 | 0.2255  | 0.80945 |
|                         | 9       | 8       |         | 8       |
| AL691482.3-vs-LINC02122 | 0.00046 | 0.12511 | 0.03907 | 0.40062 |
|                         | 5       | 2       | 1       | 8       |
| AL031432.3-vs-LINC02122 | 0.00947 | 0.36623 | 0.17147 | 0.78219 |
|                         | 4       | 2       | 4       | 1       |
| AL390208.1-vs-LINC02122 | 0.00979 | 0.52715 | 0.32429 | 0.85691 |
|                         | 7       | 8       | 7       | 6       |
| AL691482.3-vs-LINC02191 | 0.00583 | 0.05947 | 0.008   | 0.44220 |
|                         | 1       | 8       |         | 9       |
| AC097532.2-vs-LINC02191 | 0.00680 | 0.37428 | 0.18369 | 0.76259 |
|                         | 3       | 1       | 7       | 2       |
| AC092198.1-vs-LINC02278 | 0.00484 | 0.54323 | 0.35529 | 0.83057 |
|                         | 9       | 1       | 6       | 7       |
| AL691482.3-vs-LINC02278 | 0.00583 | 0.05947 | 0.008   | 0.44220 |

|                         |         |         |         |         |
|-------------------------|---------|---------|---------|---------|
|                         | 1       | 8       |         | 9       |
| AC016831.5-vs-LINC02278 | 0.00956 | 0.45910 | 0.25480 | 0.82723 |
|                         | 1       | 9       | 2       | 5       |
| LINC00562-vs-LINC02365  | 0.00972 | 1.49060 | 1.10137 | 2.01739 |
|                         | 9       | 7       | 3       | 8       |
| LINC02688-vs-LINC02365  | 0.00538 | 1.51299 | 1.13030 | 2.02526 |
|                         | 2       | 7       | 2       | 4       |
| AC084346.1-vs-LINC02365 | 0.00532 | 1.51149 | 1.1304  | 2.02105 |
|                         | 2       |         |         | 5       |
| AL691482.3-vs-LINC02620 | 0.00583 | 0.05947 | 0.008   | 0.44220 |
|                         | 1       | 8       |         | 9       |
| ARLNC1-vs-LINC02620     | 0.00508 | 0.46828 | 0.27544 | 0.79616 |
|                         | 2       | 9       | 1       |         |
| AC092198.1-vs-LINC02661 | 0.00107 | 0.43587 | 0.26501 | 0.71688 |
|                         | 1       | 5       | 9       |         |
| AL691482.3-vs-LINC02661 | 0.00583 | 0.05947 | 0.008   | 0.44220 |
|                         | 1       | 8       |         | 9       |
| AC012435.3-vs-MAFA-AS1  | 0.00067 | 0.62934 | 0.48196 | 0.8218  |
|                         |         | 5       | 1       |         |
| AC090772.3-vs-MAFA-AS1  | 0.00291 | 0.63992 | 0.47696 | 0.85855 |
|                         | 1       | 2       | 5       | 4       |
| AC010531.6-vs-MAFA-AS1  | 0.00956 | 0.59799 | 0.40532 | 0.88225 |
|                         | 1       | 7       | 5       | 8       |
| AC113143.1-vs-MAFA-AS1  | 0.00218 | 0.62074 | 0.45755 | 0.84214 |
|                         | 5       | 4       |         | 3       |
| AC005838.2-vs-MAFA-AS1  | 0.00112 | 0.61434 | 0.45824 | 0.82363 |
|                         | 5       | 6       |         | 3       |
| CFAP58-DT-vs-MAFA-AS1   | 0.00449 | 0.67911 | 0.52000 | 0.88691 |
|                         | 7       | 5       | 1       | 8       |
| TBX2-AS1-vs-MAFA-AS1    | 0.00516 | 0.59457 | 0.41300 | 0.85596 |
|                         | 5       | 2       | 5       | 2       |
| LINC00449-vs-MAFA-AS1   | 0.00473 | 0.68423 | 0.52586 | 0.89031 |
|                         |         | 8       | 1       | 4       |
| LINC00884-vs-MAFA-AS1   | 0.00246 | 0.57284 | 0.39937 | 0.82166 |
|                         | 8       | 4       | 4       | 3       |
| MIR924HG-vs-MAFA-AS1    | 0.00503 | 0.63498 | 0.46230 | 0.87216 |
|                         | 7       | 3       | 3       | 4       |
| AC060766.6-vs-MATN1-AS1 | 0.00944 | 0.70494 | 0.54137 | 0.91794 |
|                         | 2       | 9       | 8       | 2       |
| AC010531.6-vs-MATN1-AS1 | 0.00258 | 0.59799 | 0.42802 | 0.83548 |
|                         | 3       | 9       | 1       |         |
| LINC01503-vs-MATN1-AS1  | 0.00830 | 0.06757 | 0.00913 | 0.49974 |
|                         | 4       | 9       | 8       | 4       |
| AC018647.2-vs-MIR222HG  | 0.00400 | 0.56259 | 0.38023 | 0.83242 |

|                          |         |         |         |         |
|--------------------------|---------|---------|---------|---------|
|                          | 8       | 7       | 5       | 2       |
| AL691482.3-vs-MORC2-AS1  | 0.00481 | 0.35864 | 0.17580 | 0.73164 |
|                          | 9       | 2       | 1       | 6       |
| AC092198.1-vs-NAV2-IT1   | 0.00563 | 0.59639 | 0.41364 | 0.85988 |
|                          |         |         |         | 2       |
| AL691482.3-vs-NAV2-IT1   | 0.00583 | 0.05947 | 0.008   | 0.44220 |
|                          | 1       | 8       |         | 9       |
| AL391845.1-vs-NEURL1-AS1 | 0.00382 | 0.65344 | 0.48974 | 0.87185 |
|                          | 8       | 4       | 7       | 6       |
| AC092868.2-vs-NEURL1-AS1 | 0.00964 | 0.65703 | 0.47803 | 0.90306 |
|                          | 5       | 4       | 3       | 2       |
| MRV1-AS1-vs-NEURL1-AS1   | 0.00535 | 0.57810 | 0.39312 | 0.85013 |
|                          | 1       | 9       | 4       | 8       |
| AC092198.1-vs-NRG1-IT3   | 0.00107 | 0.43587 | 0.26501 | 0.71688 |
|                          | 1       | 5       | 9       |         |
| AL691482.3-vs-NRG1-IT3   | 0.00583 | 0.05947 | 0.008   | 0.44220 |
|                          | 1       | 8       |         | 9       |
| AC097532.2-vs-PCDH9-AS2  | 0.00188 | 0.37933 | 0.20584 | 0.69902 |
|                          | 3       | 2       | 9       | 1       |
| AL512625.1-vs-PRR34      | 0.00707 | 0.64533 | 0.46919 | 0.88760 |
|                          | 9       | 6       | 5       | 3       |
| PRR34-AS1-vs-PRR34       | 0.00583 | 0.05947 | 0.008   | 0.44220 |
|                          | 1       | 8       |         | 9       |
| MMP25-AS1-vs-ROR1-AS1    | 0.00583 | 0.05947 | 0.008   | 0.44220 |
|                          | 1       | 8       |         | 9       |
| AP001094.3-vs-ROR1-AS1   | 0.00086 | 0.63918 | 0.49127 | 0.83163 |
|                          |         | 6       |         | 8       |
| AC106037.2-vs-ROR1-AS1   | 0.00904 | 0.70722 | 0.54526 | 0.91729 |
|                          |         | 5       | 5       | 3       |
| AL691482.3-vs-ROR1-AS1   | 0.00909 | 0.33609 | 0.14813 | 0.76255 |
|                          | 5       | 1       |         | 1       |
| AC116913.1-vs-ROR1-AS1   | 0.00683 | 0.37359 | 0.18304 | 0.76250 |
|                          | 3       | 7       | 8       | 2       |
| LINC02352-vs-TTC3-AS1    | 0.00039 | 0.31328 | 0.16494 | 0.59502 |
|                          | 1       | 8       | 9       | 8       |
| AL024498.1-vs-TTC3-AS1   | 0.00995 | 0.31044 | 0.12755 | 0.75556 |
|                          |         | 2       | 2       | 8       |
| AL691482.3-vs-TTC3-AS1   | 0.00905 | 0.26258 | 0.0962  | 0.71673 |
|                          | 3       | 4       |         | 6       |
| AL691482.3-vs-TTN-AS1    | 0.00473 | 0.35560 | 0.17352 | 0.72874 |
|                          | 7       | 8       | 8       |         |
| AC092198.1-vs-TTTY20     | 0.00173 | 0.45135 | 0.27433 | 0.74258 |
|                          | 9       | 3       | 9       | 4       |
| AL691482.3-vs-TTTY20     | 0.00583 | 0.05947 | 0.008   | 0.44220 |

|                        |         |         |         |         |
|------------------------|---------|---------|---------|---------|
|                        | 1       | 8       |         | 9       |
| PRR34-AS1-vs-U62317.3  | 0.00057 | 0.13009 | 0.04074 | 0.41531 |
|                        | 4       | 2       | 9       | 7       |
| AL391845.1-vs-U91319.1 | 0.00718 | 0.69986 | 0.53951 | 0.90787 |
|                        | 9       | 7       | 9       | 2       |
| MIR924HG-vs-U91319.1   | 0.00191 | 0.57413 | 0.40440 | 0.81508 |
|                        | 3       | 3       | 9       | 8       |
| AL390208.1-vs-U91319.1 | 0.00770 | 0.68758 | 0.52199 | 0.90569 |
|                        | 9       | 2       | 3       | 9       |
| AC005838.2-vs-Z83847.1 | 0.00767 | 0.58251 | 0.39152 | 0.86667 |
|                        | 9       | 5       | 4       | 4       |
| AL024498.1-vs-Z83847.1 | 0.00819 | 0.33317 | 0.14751 | 0.75252 |
|                        | 5       | 5       | 2       | 2       |
| AL691482.3-vs-Z83847.1 | 0.00488 | 0.30806 | 0.13568 | 0.69945 |
|                        | 8       | 9       | 6       | 9       |
| PRR34-AS1-vs-Z83847.1  | 0.00597 | 0.13872 | 0.03392 | 0.56720 |
|                        | 5       | 3       | 8       | 6       |
| LINC00884-vs-Z84468.1  | 0.00500 | 0.05636 | 0.00756 | 0.42003 |
|                        | 9       | 8       | 5       | 7       |
| AL691482.3-vs-Z84468.1 | 0.00583 | 0.05947 | 0.008   | 0.44220 |
|                        | 1       | 8       |         | 9       |
