# Supplementary material for: Immune Subtype Profiling and Establishment of Prognostic Immune-Related lncRNA Pairs in Human Ovarian Cancer
Source: PubMed Central journal article supplement (PMC9107039; doi:10.1155/2022/8338137), 2022-05-05
Supplement: 8338137.f5.pdf [file 8338137.f5.pdf]

Supplementary Table4: The 51 enriched pathways were selected.

| Term                                     | ES      | NES     | NP     | FDR    | FWER  |
|------------------------------------------|---------|---------|--------|--------|-------|
| HALLMARK_OXIDATIVE_PHOSPHORYLATION       | -0.3389 | -1.4469 | 0.2124 | 0.3892 | 0.598 |
| HALLMARK_DNA_REPAIR                      | -0.2315 | -1.0491 | 0.4291 | 0.8376 | 0.898 |
| HALLMARK_BILE_ACID_METABOLISM            | -0.2533 | -0.9658 | 0.5131 | 0.7012 | 0.925 |
| HALLMARK_PANCREAS_BETA_CELLS             | -0.2902 | -0.8699 | 0.6474 | 0.6589 | 0.948 |
| HALLMARK_MYC_TARGETS_V1                  | -0.1708 | -0.7436 | 0.6306 | 0.6934 | 0.979 |
| HALLMARK_INTERFERON_ALPHA_RESPONSE       | 0.216   | 0.5286  | 0.8232 | 0.9267 | 0.991 |
| HALLMARK_PEROXISOME                      | 0.1696  | 0.7234  | 0.8548 | 0.7434 | 0.982 |
| HALLMARK_MYC_TARGETS_V2                  | 0.2043  | 0.7396  | 0.6841 | 0.7383 | 0.982 |
| HALLMARK_SPERMATOGENESIS                 | 0.2155  | 0.7941  | 0.7841 | 0.6749 | 0.972 |
| HALLMARK_KRAS_SIGNALING_DN               | 0.2107  | 0.8093  | 0.8649 | 0.6683 | 0.97  |
| HALLMARK_FATTY_ACID_METABOLISM           | 0.1854  | 0.8127  | 0.7095 | 0.6806 | 0.97  |
| HALLMARK_INTERFERON_GAMMA_RESPONSE       | 0.3101  | 0.8412  | 0.626  | 0.656  | 0.963 |
| HALLMARK_ALLOGRAFT_REJECTION             | 0.3004  | 0.8512  | 0.5835 | 0.657  | 0.963 |
| HALLMARK_XENOBIOTIC_METABOLISM           | 0.2029  | 0.858   | 0.6787 | 0.6647 | 0.961 |
| HALLMARK_E2F_TARGETS                     | 0.2937  | 0.8751  | 0.5665 | 0.6555 | 0.956 |
| HALLMARK_WNT_BETA_CATENIN_SIGNALING      | 0.3067  | 0.9251  | 0.5706 | 0.5993 | 0.946 |
| HALLMARK_HEME_METABOLISM                 | 0.2345  | 0.9765  | 0.4821 | 0.5414 | 0.928 |
| HALLMARK_ESTROGEN_RESPONSE_LATE          | 0.2536  | 1.0148  | 0.4105 | 0.5056 | 0.917 |
| HALLMARK_ESTROGEN_RESPONSE_EARLY         | 0.2898  | 1.0513  | 0.4037 | 0.4695 | 0.895 |
| HALLMARK_ADIPOGENESIS                    | 0.2446  | 1.0921  | 0.3486 | 0.4281 | 0.872 |
| HALLMARK_COMPLEMENT                      | 0.3165  | 1.102   | 0.3473 | 0.4294 | 0.869 |
| HALLMARK_REACTIVE_OXYGEN_SPECIES_PATHWAY | 0.2996  | 1.1359  | 0.3258 | 0.4017 | 0.855 |
| HALLMARK_UV_RESPONSE_UP                  | 0.2697  | 1.2032  | 0.2271 | 0.3322 | 0.816 |
| HALLMARK_IL6_JAK_STAT3_SIGNALING         | 0.4216  | 1.2063  | 0.2846 | 0.3411 | 0.813 |
| HALLMARK_P53_PATHWAY                     | 0.3032  | 1.2238  | 0.2233 | 0.334  | 0.804 |
| HALLMARK_MTORC1_SIGNALING                | 0.301   | 1.2539  | 0.2349 | 0.3116 | 0.78  |
| HALLMARK_COAGULATION                     | 0.3583  | 1.2662  | 0.1887 | 0.3113 | 0.772 |

|                                            |        |        |        |        |       |
|--------------------------------------------|--------|--------|--------|--------|-------|
| HALLMARK_APOPTOSIS                         | 0.3326 | 1.2723 | 0.2087 | 0.316  | 0.77  |
| HALLMARK_G2M_CHECKPOINT                    | 0.4414 | 1.3726 | 0.1968 | 0.219  | 0.685 |
| HALLMARK_PROTEIN_SECRETION                 | 0.3695 | 1.4102 | 0.149  | 0.1959 | 0.65  |
| HALLMARK_MYOGENESIS                        | 0.4    | 1.4326 | 0.0627 | 0.1857 | 0.626 |
| HALLMARK_INFLAMMATORY_RESPONSE             | 0.4999 | 1.4402 | 0.1388 | 0.1879 | 0.616 |
| HALLMARK_IL2_STAT5_SIGNALING               | 0.4215 | 1.4527 | 0.1006 | 0.1872 | 0.596 |
| HALLMARK_GLYCOLYSIS                        | 0.3471 | 1.4626 | 0.0792 | 0.1891 | 0.579 |
| HALLMARK_NOTCH_SIGNALING                   | 0.4966 | 1.4818 | 0.0787 | 0.1816 | 0.547 |
| HALLMARK_KRAS_SIGNALING_UP                 | 0.4513 | 1.482  | 0.0752 | 0.1935 | 0.547 |
| HALLMARK_PI3K_AKT_MTOR_SIGNALING           | 0.3513 | 1.4966 | 0.0634 | 0.1911 | 0.516 |
| HALLMARK_HEDGEHOG_SIGNALING                | 0.5198 | 1.5337 | 0.0291 | 0.1738 | 0.465 |
| HALLMARK_UNFOLDED_PROTEIN_RESPONSE         | 0.3586 | 1.5351 | 0.0671 | 0.1851 | 0.46  |
| HALLMARK_ANGIOGENESIS                      | 0.5607 | 1.5406 | 0.0623 | 0.1951 | 0.454 |
| HALLMARK_APICAL_SURFACE                    | 0.4907 | 1.5762 | 0.0183 | 0.1741 | 0.398 |
| HALLMARK_TGF_BETA_SIGNALING                | 0.5052 | 1.5853 | 0.0272 | 0.1814 | 0.381 |
| HALLMARK_TNFA_SIGNALING_VIA_NFKB           | 0.5399 | 1.5875 | 0.0888 | 0.2024 | 0.378 |
| HALLMARK_CHOLESTEROL_HOMEOSTASIS           | 0.451  | 1.6157 | 0.0241 | 0.1989 | 0.35  |
| HALLMARK_APICAL_JUNCTION                   | 0.4668 | 1.6983 | 0.0077 | 0.1338 | 0.235 |
| HALLMARK_ANDROGEN_RESPONSE                 | 0.4584 | 1.7282 | 0.0142 | 0.1385 | 0.206 |
| HALLMARK_UV_RESPONSE_DN                    | 0.552  | 1.7363 | 0.002  | 0.1617 | 0.2   |
| HALLMARK_MITOTIC_SPINDLE                   | 0.534  | 1.7388 | 0.0061 | 0.2127 | 0.198 |
| HALLMARK_EPITHELIAL_MESENCHYMAL_TRANSITION | 0.7063 | 1.9013 | 0.0079 | 0.0926 | 0.074 |
| HALLMARK_HYPOXIA                           | 0.5238 | 1.903  | 0      | 0.1852 | 0.074 |
