# Supplementary material for: Immune Subtype Profiling and Establishment of Prognostic Immune-Related lncRNA Pairs in Human Ovarian Cancer
Source: PubMed Central journal article supplement (PMC9107039; doi:10.1155/2022/8338137), 2022-05-05
Supplement: 8338137.f6.pdf [file 8338137.f6.pdf]

Supplementary Table5: 180 differential lncRNA pairs were identified.

| lncRNAPairs              | P.value  | FDR      |
|--------------------------|----------|----------|
| AP001094.3-vs-AC003009.1 | 3.12E-20 | 7.97E-16 |
| AP001094.3-vs-AC004895.1 | 1.82E-34 | 4.65E-30 |
| AP001094.3-vs-AC005392.2 | 6.03E-15 | 1.53E-10 |
| AP001094.3-vs-AC007040.1 | 4.66E-41 | 1.19E-36 |
| AP001094.3-vs-AC007216.1 | 7.99E-34 | 2.04E-29 |
| AP001094.3-vs-AC007431.2 | 2.49E-34 | 6.36E-30 |
| AP001094.3-vs-AC007463.1 | 2.18E-20 | 5.55E-16 |
| AP001094.3-vs-AC007598.2 | 5.34E-36 | 1.37E-31 |
| AP001094.3-vs-AC007608.1 | 8.65E-35 | 2.21E-30 |
| AP001094.3-vs-AC007787.1 | 7.56E-36 | 1.93E-31 |
| AP001094.3-vs-AC007952.9 | 2.10E-27 | 5.36E-23 |
| AP001094.3-vs-AC007991.3 | 1.15E-25 | 2.94E-21 |
| AP001094.3-vs-AC008103.1 | 1.16E-20 | 2.97E-16 |
| AP001094.3-vs-AC008115.2 | 6.03E-15 | 1.53E-10 |
| AP001094.3-vs-AC008687.2 | 3.36E-30 | 8.58E-26 |
| AP001094.3-vs-AC008739.1 | 2.17E-19 | 5.53E-15 |
| AP001094.3-vs-AC009396.3 | 3.12E-20 | 7.97E-16 |
| AP001094.3-vs-AC010333.3 | 1.21E-24 | 3.08E-20 |
| AP001094.3-vs-AC010894.3 | 1.36E-14 | 3.46E-10 |
| AP001094.3-vs-AC010974.1 | 1.39E-25 | 3.55E-21 |
| AP001094.3-vs-AC012038.2 | 1.14E-11 | 2.90E-07 |
| AP001094.3-vs-AC012150.1 | 4.16E-26 | 1.06E-21 |
| AP001094.3-vs-AC012531.1 | 3.17E-39 | 8.11E-35 |
| AP001094.3-vs-AC012629.2 | 7.85E-21 | 2.00E-16 |
| AP001094.3-vs-AC013248.1 | 4.31E-21 | 1.10E-16 |
| AP001094.3-vs-AC013799.1 | 5.05E-26 | 1.29E-21 |
| AP001094.3-vs-AC015909.2 | 2.51E-24 | 6.42E-20 |
| AP001094.3-vs-AC016831.5 | 2.49E-37 | 6.38E-33 |
| AP001094.3-vs-AC019211.1 | 5.48E-22 | 1.40E-17 |
| AP001094.3-vs-AC021134.1 | 5.80E-22 | 1.48E-17 |
| AP001094.3-vs-AC021491.1 | 2.69E-25 | 6.88E-21 |
| AP001094.3-vs-AC021713.1 | 3.92E-23 | 1.00E-18 |
| AP001094.3-vs-AC022166.1 | 1.16E-20 | 2.97E-16 |
| AP001094.3-vs-AC023794.1 | 1.62E-28 | 4.14E-24 |
| AP001094.3-vs-AC023824.5 | 2.76E-18 | 7.03E-14 |
| AP001094.3-vs-AC027130.1 | 3.46E-35 | 8.85E-31 |
| AP001094.3-vs-AC027343.3 | 1.16E-20 | 2.97E-16 |
| AP001094.3-vs-AC069029.1 | 3.97E-26 | 1.02E-21 |
| AP001094.3-vs-AC069277.1 | 4.40E-16 | 1.12E-11 |
| AP001094.3-vs-AC069366.2 | 2.82E-33 | 7.20E-29 |

---

|                          |          |          |
|--------------------------|----------|----------|
| AP001094.3-vs-AC091179.1 | 2.19E-14 | 5.56E-10 |
| AP001094.3-vs-AC092198.1 | 1.85E-12 | 4.70E-08 |
| AP001094.3-vs-AC092295.1 | 1.41E-22 | 3.60E-18 |
| AP001094.3-vs-AC093843.1 | 4.07E-26 | 1.04E-21 |
| AP001094.3-vs-AC096708.2 | 1.99E-27 | 5.07E-23 |
| AC011461.1-vs-AC097625.1 | 1.94E-06 | 0.049424 |
| AP001094.3-vs-AC097625.1 | 1.39E-11 | 3.55E-07 |
| AP001094.3-vs-AC099684.3 | 2.11E-22 | 5.38E-18 |
| AP001094.3-vs-AC103858.1 | 1.35E-34 | 3.46E-30 |
| AP001094.3-vs-AC103925.1 | 7.63E-23 | 1.95E-18 |
| AP001094.3-vs-AC104462.1 | 1.41E-48 | 3.61E-44 |
| AP001094.3-vs-AC104462.2 | 1.99E-34 | 5.10E-30 |
| MAFA-AS1-vs-AC106037.2   | 1.64E-06 | 0.041697 |
| AP001094.3-vs-AC108063.1 | 5.87E-35 | 1.50E-30 |
| AP001094.3-vs-AC113404.1 | 1.06E-23 | 2.72E-19 |
| AP001094.3-vs-AC116616.1 | 5.80E-22 | 1.48E-17 |
| AP001094.3-vs-AC118754.2 | 8.22E-24 | 2.10E-19 |
| AP001094.3-vs-AC120193.1 | 8.36E-25 | 2.14E-20 |
| AP001094.3-vs-AC129507.3 | 3.67E-18 | 9.35E-14 |
| AP001094.3-vs-AC134775.1 | 7.35E-32 | 1.88E-27 |
| AP001094.3-vs-AC138028.5 | 3.98E-27 | 1.02E-22 |
| AC010531.6-vs-AC138956.1 | 7.37E-07 | 0.018741 |
| AP001094.3-vs-AC145350.2 | 2.11E-22 | 5.38E-18 |
| AP001094.3-vs-AC254562.2 | 4.23E-32 | 1.08E-27 |
| AP001094.3-vs-AL117382.1 | 2.71E-18 | 6.90E-14 |
| AP001094.3-vs-AL135934.1 | 1.21E-24 | 3.08E-20 |
| AP001094.3-vs-AL138828.1 | 5.05E-26 | 1.29E-21 |
| AP001094.3-vs-AL160270.1 | 1.10E-18 | 2.81E-14 |
| AP001094.3-vs-AL356309.2 | 5.80E-22 | 1.48E-17 |
| AP001094.3-vs-AL360091.2 | 1.73E-26 | 4.42E-22 |
| AP001094.3-vs-AL390061.1 | 2.23E-20 | 5.68E-16 |
| AP001094.3-vs-AL445489.1 | 4.75E-26 | 1.21E-21 |
| AP001094.3-vs-AL513188.1 | 8.41E-34 | 2.15E-29 |
| AP001094.3-vs-AP000873.3 | 8.79E-25 | 2.24E-20 |
| AC012435.3-vs-AP001094.3 | 3.53E-09 | 8.97E-05 |
| AC004253.1-vs-AP001094.3 | 4.60E-08 | 0.001171 |
| TTN-AS1-vs-AP001094.3    | 7.41E-18 | 1.89E-13 |
| AC060766.6-vs-AP001094.3 | 7.20E-07 | 0.018296 |
| AC138956.1-vs-AP001094.3 | 1.40E-09 | 3.56E-05 |
| AC090772.3-vs-AP001094.3 | 1.03E-11 | 2.63E-07 |
| AC090229.1-vs-AP001094.3 | 5.83E-28 | 1.49E-23 |
| AP003717.1-vs-AP001094.3 | 1.96E-06 | 0.049771 |
| AC080013.5-vs-AP001094.3 | 1.17E-13 | 2.97E-09 |
| AC006435.2-vs-AP001094.3 | 2.37E-07 | 0.006027 |

---

---

|                           |          |          |
|---------------------------|----------|----------|
| MAFA-AS1-vs-AP001094.3    | 6.14E-22 | 1.57E-17 |
| AC112236.2-vs-AP001094.3  | 3.19E-20 | 8.14E-16 |
| CR381653.1-vs-AP001094.3  | 4.17E-26 | 1.07E-21 |
| AC090617.4-vs-AP001094.3  | 8.39E-20 | 2.14E-15 |
| AC097634.3-vs-AP001094.3  | 3.07E-08 | 0.00078  |
| AC087071.2-vs-AP001094.3  | 4.14E-15 | 1.06E-10 |
| AC113143.1-vs-AP001094.3  | 7.17E-08 | 0.001824 |
| AC092868.2-vs-AP001094.3  | 6.55E-19 | 1.67E-14 |
| AC116447.1-vs-AP001094.3  | 1.40E-11 | 3.56E-07 |
| LINC02352-vs-AP001094.3   | 1.65E-11 | 4.21E-07 |
| AF131215.7-vs-AP001094.3  | 1.16E-06 | 0.029377 |
| PRR34-vs-AP001094.3       | 6.97E-34 | 1.78E-29 |
| BMS1P4-vs-AP001094.3      | 2.56E-33 | 6.54E-29 |
| AL512625.1-vs-AP001094.3  | 6.18E-12 | 1.57E-07 |
| AC069234.5-vs-AP001094.3  | 2.01E-15 | 5.13E-11 |
| AC011461.1-vs-AP001094.3  | 5.73E-23 | 1.46E-18 |
| AL359881.2-vs-AP001094.3  | 5.81E-13 | 1.48E-08 |
| DBH-AS1-vs-AP001094.3     | 5.73E-23 | 1.46E-18 |
| AC005332.7-vs-AP001094.3  | 1.73E-14 | 4.39E-10 |
| AC005838.2-vs-AP001094.3  | 4.43E-10 | 1.13E-05 |
| AC005837.1-vs-AP001094.3  | 1.68E-17 | 4.27E-13 |
| AC007406.3-vs-AP001094.3  | 1.70E-07 | 0.004312 |
| AL596325.2-vs-AP001094.3  | 3.69E-14 | 9.38E-10 |
| AL121672.3-vs-AP001094.3  | 2.58E-17 | 6.56E-13 |
| CFAP58-DT-vs-AP001094.3   | 2.11E-10 | 5.37E-06 |
| ZNF433-AS1-vs-AP001094.3  | 4.43E-07 | 0.011258 |
| AC063943.1-vs-AP001094.3  | 8.13E-14 | 2.07E-09 |
| LINC00449-vs-AP001094.3   | 7.15E-19 | 1.82E-14 |
| AC006538.1-vs-AP001094.3  | 4.32E-20 | 1.10E-15 |
| MCPH1-AS1-vs-AP001094.3   | 4.83E-13 | 1.23E-08 |
| AC141930.1-vs-AP001094.3  | 4.34E-09 | 0.00011  |
| LINC00937-vs-AP001094.3   | 5.63E-24 | 1.44E-19 |
| AC004596.1-vs-AP001094.3  | 1.05E-15 | 2.68E-11 |
| AC092903.2-vs-AP001094.3  | 9.05E-10 | 2.30E-05 |
| LINC02749-vs-AP001094.3   | 1.03E-08 | 0.000262 |
| AC096586.2-vs-AP001094.3  | 4.02E-16 | 1.02E-11 |
| CDC42-IT1-vs-AP001094.3   | 2.53E-19 | 6.45E-15 |
| MRVI1-AS1-vs-AP001094.3   | 4.47E-18 | 1.14E-13 |
| U62317.3-vs-AP001094.3    | 3.82E-19 | 9.73E-15 |
| LINC01504-vs-AP001094.3   | 2.84E-14 | 7.22E-10 |
| AC118344.1-vs-AP001094.3  | 3.85E-17 | 9.80E-13 |
| SLC12A5-AS1-vs-AP001094.3 | 1.13E-19 | 2.88E-15 |
| FAM66B-vs-AP001094.3      | 1.34E-24 | 3.43E-20 |
| TERC-vs-AP001094.3        | 5.69E-25 | 1.45E-20 |

---

---

|                            |          |          |
|----------------------------|----------|----------|
| AC097532.2-vs-AP001094.3   | 8.36E-22 | 2.13E-17 |
| AC129507.1-vs-AP001094.3   | 9.69E-11 | 2.46E-06 |
| AL606489.1-vs-AP001094.3   | 1.30E-14 | 3.30E-10 |
| AC104411.1-vs-AP001094.3   | 6.41E-07 | 0.016293 |
| AC131025.1-vs-AP001094.3   | 3.77E-17 | 9.59E-13 |
| AL136115.2-vs-AP001094.3   | 2.55E-17 | 6.48E-13 |
| ATP6V1B1-AS1-vs-AP001094.3 | 7.37E-19 | 1.88E-14 |
| AL390208.1-vs-AP001094.3   | 8.66E-17 | 2.20E-12 |
| AC105446.1-vs-AP001094.3   | 2.43E-08 | 0.000619 |
| AP000873.4-vs-AP001094.3   | 5.86E-17 | 1.49E-12 |
| LINC01426-vs-AP001094.3    | 5.34E-19 | 1.36E-14 |
| AP001094.3-vs-AP001636.3   | 3.87E-28 | 9.91E-24 |
| AP001094.3-vs-AP002478.2   | 3.09E-18 | 7.87E-14 |
| AP001094.3-vs-AP002892.1   | 1.53E-23 | 3.91E-19 |
| AP001094.3-vs-ARLNC1       | 3.08E-18 | 7.85E-14 |
| AP001094.3-vs-ASTN2-AS1    | 3.12E-20 | 7.97E-16 |
| AP001094.3-vs-BMP7-AS1     | 1.87E-24 | 4.77E-20 |
| AP001094.3-vs-C22orf24     | 4.43E-28 | 1.13E-23 |
| AP001094.3-vs-CU638689.5   | 6.74E-20 | 1.72E-15 |
| AP001094.3-vs-FAM30A       | 4.14E-17 | 1.05E-12 |
| AP001094.3-vs-FOCAD-AS1    | 9.82E-21 | 2.50E-16 |
| AP001094.3-vs-HSD17B3-AS1  | 7.78E-28 | 1.99E-23 |
| AP001094.3-vs-KCNAB1-AS1   | 9.79E-24 | 2.50E-19 |
| AP001094.3-vs-KIAA2012-AS1 | 7.35E-22 | 1.88E-17 |
| AP001094.3-vs-LINC00159    | 4.83E-39 | 1.24E-34 |
| AP001094.3-vs-LINC00562    | 1.05E-41 | 2.69E-37 |
| AP001094.3-vs-LINC00567    | 5.05E-26 | 1.29E-21 |
| AP001094.3-vs-LINC00681    | 2.46E-19 | 6.28E-15 |
| AP001094.3-vs-LINC01297    | 3.51E-13 | 8.93E-09 |
| AP001094.3-vs-LINC01300    | 2.07E-23 | 5.27E-19 |
| AP001094.3-vs-LINC01323    | 2.11E-22 | 5.38E-18 |
| AP001094.3-vs-LINC01501    | 8.31E-30 | 2.12E-25 |
| AP001094.3-vs-LINC01525    | 1.53E-13 | 3.89E-09 |
| AP001094.3-vs-LINC01794    | 2.44E-25 | 6.23E-21 |
| AP001094.3-vs-LINC02076    | 1.45E-24 | 3.72E-20 |
| AP001094.3-vs-LINC02110    | 7.22E-20 | 1.84E-15 |
| AP001094.3-vs-LINC02122    | 4.92E-16 | 1.25E-11 |
| AP001094.3-vs-LINC02145    | 7.88E-25 | 2.01E-20 |
| AP001094.3-vs-LINC02278    | 1.59E-21 | 4.04E-17 |
| AP001094.3-vs-LINC02330    | 1.16E-20 | 2.97E-16 |
| AP001094.3-vs-LINC02365    | 5.43E-14 | 1.38E-09 |
| AP001094.3-vs-LINC02640    | 1.67E-23 | 4.27E-19 |
| AP001094.3-vs-LINC02688    | 2.51E-25 | 6.40E-21 |
| AP001094.3-vs-LURAP1L-AS1  | 1.55E-21 | 3.96E-17 |

---

---

|                          |          |          |
|--------------------------|----------|----------|
| AP001094.3-vs-MORC2-AS1  | 4.39E-39 | 1.12E-34 |
| AP001094.3-vs-NAV2-IT1   | 6.07E-27 | 1.55E-22 |
| AP001094.3-vs-NEURL1-AS1 | 3.90E-17 | 9.94E-13 |
| AP001094.3-vs-NRG1-IT1   | 2.58E-18 | 6.58E-14 |
| AP001094.3-vs-ROR1-AS1   | 1.05E-41 | 2.69E-37 |
| AP001094.3-vs-SMIM2-IT1  | 1.73E-16 | 4.40E-12 |
| AP001094.3-vs-TTC3-AS1   | 1.05E-45 | 2.69E-41 |
| AP001094.3-vs-Z83847.1   | 1.01E-23 | 2.58E-19 |

---
