# Supplementary material for: Immune Subtype Profiling and Establishment of Prognostic Immune-Related lncRNA Pairs in Human Ovarian Cancer
Source: PubMed Central journal article supplement (PMC9107039; doi:10.1155/2022/8338137), 2022-05-05
Supplement: 8338137.f7.pdf [file 8338137.f7.pdf]

Supplementary Table6: The univariate Cox results of the training set were summarized.

| pair                       | p.value  | HR       | Low<br>95%CI | High<br>95%CI |
|----------------------------|----------|----------|--------------|---------------|
| AC027130.1_vs_AL391422.3   | 0.045086 | 0.669238 | 0.451836     | 0.991243      |
| MRV1_AS1_vs_AL391422.3     | 0.024215 | 0.459421 | 0.233586     | 0.903594      |
| AC092198.1_vs_AC135012.2   | 0.024355 | 0.550466 | 0.327364     | 0.925614      |
| MRV1_AS1_vs_AL139350.1     | 0.022557 | 0.455181 | 0.231451     | 0.895178      |
| AC092868.2_vs_AC022166.1   | 0.034176 | 0.630864 | 0.411907     | 0.966213      |
| AC092868.2_vs_AC090377.1   | 0.016314 | 0.597583 | 0.392583     | 0.909631      |
| AC016831.5_vs_AC104462.2   | 0.028929 | 0.625255 | 0.410273     | 0.952886      |
| KIAA2012_AS1_vs_AC093843.1 | 0.013997 | 0.662892 | 0.477559     | 0.92015       |
| AC007608.1_vs_AL391422.3   | 0.030531 | 1.529719 | 1.040733     | 2.248454      |
| AC106037.2_vs_AL391422.3   | 0.025637 | 0.674305 | 0.477034     | 0.953156      |
| AC097532.2_vs_AL391422.3   | 0.023268 | 0.411669 | 0.191248     | 0.886135      |
| AL390208.1_vs_AL391422.3   | 0.044137 | 0.45769  | 0.213822     | 0.979697      |
