# Supplementary material for: Immune Subtype Profiling and Establishment of Prognostic Immune-Related lncRNA Pairs in Human Ovarian Cancer
Source: PubMed Central journal article supplement (PMC9107039; doi:10.1155/2022/8338137), 2022-05-05
Supplement: 8338137.f8.pdf [file 8338137.f8.pdf]

Supplementary Table7: The immune score of each sample and the correlation between scores and the Riskscore.

| Immue                                 | Corr     | P.value  |
|---------------------------------------|----------|----------|
| StromalScore-ESTIMATE                 | 0.14782  | 0.004223 |
| ImmuneScore-ESTIMATE                  | 0.032422 | 0.532468 |
| ESTIMATEScore-ESTIMATE                | 0.104614 | 0.043468 |
| Activated B cell-ssGSEA               | 0.034818 | 0.502608 |
| Activated CD4 T cell-ssGSEA           | -0.02491 | 0.631527 |
| Activated CD8 T cell-ssGSEA           | -0.01039 | 0.841528 |
| Central memory CD4 T cell-ssGSEA      | 0.006169 | 0.905484 |
| Central memory CD8 T cell-ssGSEA      | 0.074666 | 0.150089 |
| Effector memeory CD4 T cell-ssGSEA    | 0.118173 | 0.022451 |
| Effector memeory CD8 T cell-ssGSEA    | -0.0012  | 0.981634 |
| Gamma delta T cell-ssGSEA             | 0.022869 | 0.659757 |
| Immature B cell-ssGSEA                | -0.02111 | 0.684531 |
| Memory B cell-ssGSEA                  | 0.081022 | 0.11826  |
| Regulatory T cell-ssGSEA              | 0.088374 | 0.088306 |
| T follicular helper cell-ssGSEA       | 0.071779 | 0.166536 |
| Type 1 T helper cell-ssGSEA           | 0.057162 | 0.270822 |
| Type 17 T helper cell-ssGSEA          | -0.01933 | 0.709868 |
| Type 2 T helper cell-ssGSEA           | 0.014407 | 0.781529 |
| Activated dendritic cell-ssGSEA       | 0.012261 | 0.813429 |
| CD56bright natural killer cell-ssGSEA | 0.079756 | 0.12414  |
| CD56dim natural killer cell-ssGSEA    | -0.08109 | 0.117968 |
| Eosinophil-ssGSEA                     | 0.006649 | 0.89816  |
| Immature dendritic cell-ssGSEA        | 0.017679 | 0.733623 |
| Macrophage-ssGSEA                     | 0.089617 | 0.083904 |
| Mast cell-ssGSEA                      | 0.064052 | 0.217141 |
| MDSC-ssGSEA                           | 0.031664 | 0.542103 |
| Monocyte-ssGSEA                       | -0.02047 | 0.693581 |
| Natural killer cell-ssGSEA            | 0.050768 | 0.328156 |
| Natural killer T cell-ssGSEA          | 0.020865 | 0.687939 |
| Neutrophil-ssGSEA                     | -0.01192 | 0.818468 |
| Plasmacytoid dendritic cell-ssGSEA    | 0.006809 | 0.895721 |
| T cells-MCPcounter                    | -0.00663 | 0.898399 |
| CD8 T cells-MCPcounter                | -0.00696 | 0.893455 |
| Cytotoxic lymphocytes-MCPcounter      | -0.01502 | 0.772524 |
| B lineage-MCPcounter                  | -0.07496 | 0.148506 |
| NK cells-MCPcounter                   | -0.07008 | 0.176857 |
| Monocytic lineage-MCPcounter          | 0.006754 | 0.896564 |
| Myeloid dendritic cells-MCPcounter    | -0.00139 | 0.978601 |
| Neutrophils-MCPcounter                | -0.0725  | 0.162297 |
| Endothelial cells-MCPcounter          | 0.010774 | 0.8357   |

---

|                                           |          |          |
|-------------------------------------------|----------|----------|
| Fibroblasts-MCPcounter                    | 0.157361 | 0.002304 |
| B cells naive-CIBERSORT                   | -0.07894 | 0.128051 |
| B cells memory-CIBERSORT                  | 0.094333 | 0.068786 |
| Plasma cells-CIBERSORT                    | -0.00891 | 0.863779 |
| T cells CD8-CIBERSORT                     | -0.0241  | 0.642715 |
| T cells CD4 memory resting-CIBERSORT      | 0.055459 | 0.285373 |
| T cells CD4 memory<br>activated-CIBERSORT | -0.00185 | 0.971532 |
| T cells follicular helper-CIBERSORT       | -0.13478 | 0.009153 |
| T cells regulatory (Tregs)-CIBERSORT      | 0.016969 | 0.743929 |
| T cells gamma delta-CIBERSORT             | 0.040883 | 0.431133 |
| NK cells resting-CIBERSORT                | 0.031522 | 0.543916 |
| NK cells activated-CIBERSORT              | -0.02996 | 0.564092 |
| Monocytes-CIBERSORT                       | -0.06076 | 0.241758 |
| Macrophages M0-CIBERSORT                  | 0.063437 | 0.221598 |
| Macrophages M1-CIBERSORT                  | -0.07165 | 0.167299 |
| Macrophages M2-CIBERSORT                  | 0.021376 | 0.680702 |
| Dendritic cells resting-CIBERSORT         | 0.050419 | 0.331494 |
| Dendritic cells activated-CIBERSORT       | -0.06686 | 0.197581 |
| Mast cells resting-CIBERSORT              | -0.0171  | 0.742099 |
| Mast cells activated-CIBERSORT            | 0.065233 | 0.208768 |
| Eosinophils-CIBERSORT                     | -0.03126 | 0.547258 |
| Neutrophils-CIBERSORT                     | 0.054371 | 0.294951 |
| B_cell-TIMER                              | -0.05628 | 0.282895 |
| CD4_Tcell-TIMER                           | -0.02057 | 0.694958 |
| CD8_Tcell-TIMER                           | -0.02388 | 0.648818 |
| Neutrophil-TIMER                          | -0.00515 | 0.921722 |
| Macrophage-TIMER                          | 0.042897 | 0.413222 |
| Dendritic-TIMER                           | -0.01737 | 0.740493 |

---
