# Supplementary material for: Immune Subtype Profiling and Establishment of Prognostic Immune-Related lncRNA Pairs in Human Ovarian Cancer
Source: PubMed Central journal article supplement (PMC9107039; doi:10.1155/2022/8338137), 2022-05-05
Supplement: 8338137.f9.pdf [file 8338137.f9.pdf]

Supplementary Table8: 351 genes were identified by the Spearman correlation coefficients.

| lncRNA                   | mRNA     | Corr     | P.value  |
|--------------------------|----------|----------|----------|
| AC007608.1_vs_AL391422.3 | SKI      | 0.303497 | 2.18E-09 |
| AC007608.1_vs_AL391422.3 | PDPN     | 0.3166   | 3.96E-10 |
| AC007608.1_vs_AL391422.3 | HSPB7    | 0.31915  | 2.81E-10 |
| AC007608.1_vs_AL391422.3 | HSPG2    | 0.325412 | 1.20E-10 |
| AC007608.1_vs_AL391422.3 | WNT4     | 0.300309 | 3.27E-09 |
| AC007608.1_vs_AL391422.3 | COL16A1  | 0.403388 | 4.44E-16 |
| AC007608.1_vs_AL391422.3 | AZIN2    | 0.305816 | 1.62E-09 |
| AC007608.1_vs_AL391422.3 | CSMD2    | 0.300541 | 3.17E-09 |
| AC007608.1_vs_AL391422.3 | BMP8A    | 0.303381 | 2.22E-09 |
| AC007608.1_vs_AL391422.3 | HIVEP3   | 0.307266 | 1.35E-09 |
| AC007608.1_vs_AL391422.3 | PODN     | 0.379502 | 3.20E-14 |
| AC007608.1_vs_AL391422.3 | PLPPR4   | 0.30628  | 1.53E-09 |
| AC007608.1_vs_AL391422.3 | OLFML3   | 0.379734 | 3.06E-14 |
| AC007608.1_vs_AL391422.3 | CTSK     | 0.318687 | 2.99E-10 |
| AC007608.1_vs_AL391422.3 | MEF2D    | 0.308541 | 1.14E-09 |
| AC007608.1_vs_AL391422.3 | RGS4     | 0.351268 | 2.84E-12 |
| AC007608.1_vs_AL391422.3 | PRRX1    | 0.329528 | 6.75E-11 |
| AC007608.1_vs_AL391422.3 | FMO1     | 0.336833 | 2.39E-11 |
| AC007608.1_vs_AL391422.3 | TNFSF4   | 0.329702 | 6.59E-11 |
| AC007608.1_vs_AL391422.3 | HMCN1    | 0.389995 | 5.33E-15 |
| AC007608.1_vs_AL391422.3 | LMOD1    | 0.423563 | 0        |
| AC007608.1_vs_AL391422.3 | PPP1R12B | 0.307498 | 1.31E-09 |
| AC027130.1_vs_AL391422.3 | MDM4     | 0.327811 | 8.58E-11 |
| AC007608.1_vs_AL391422.3 | PROX1    | 0.307585 | 1.29E-09 |
| AC007608.1_vs_AL391422.3 | DISC1    | 0.36611  | 2.83E-13 |
| AC027130.1_vs_AL391422.3 | PCNX2    | 0.308916 | 1.09E-09 |
| AC007608.1_vs_AL391422.3 | NID1     | 0.332774 | 4.27E-11 |
| AC007608.1_vs_AL391422.3 | GREM2    | 0.366594 | 2.62E-13 |
| AC007608.1_vs_AL391422.3 | KIF26B   | 0.338804 | 1.80E-11 |
| AC007608.1_vs_AL391422.3 | PXDN     | 0.307613 | 1.29E-09 |
| AC007608.1_vs_AL391422.3 | EMILIN1  | 0.402634 | 4.44E-16 |
| AC007608.1_vs_AL391422.3 | CNRIP1   | 0.394575 | 2.44E-15 |
| AC007608.1_vs_AL391422.3 | ANTXR1   | 0.355095 | 1.59E-12 |
| AC007608.1_vs_AL391422.3 | SH3RF3   | 0.360602 | 6.76E-13 |
| AC106037.2_vs_AL391422.3 | SLC20A1  | 0.30686  | 1.42E-09 |
| AC007608.1_vs_AL391422.3 | ZEB2     | 0.381299 | 2.35E-14 |
| AC007608.1_vs_AL391422.3 | GALNT5   | 0.344717 | 7.58E-12 |
| AC007608.1_vs_AL391422.3 | WIPF1    | 0.316078 | 4.24E-10 |
| AC007608.1_vs_AL391422.3 | ITGA4    | 0.315034 | 4.88E-10 |
| AC007608.1_vs_AL391422.3 | COL3A1   | 0.345239 | 7.02E-12 |
| AC007608.1_vs_AL391422.3 | COL5A2   | 0.358225 | 9.79E-13 |

---

|                          |          |          |          |
|--------------------------|----------|----------|----------|
| AC007608.1_vs_AL391422.3 | CDK15    | 0.316311 | 4.11E-10 |
| AC007608.1_vs_AL391422.3 | GPR1     | 0.369125 | 1.75E-13 |
| AC007608.1_vs_AL391422.3 | FN1      | 0.337007 | 2.34E-11 |
| AC007608.1_vs_AL391422.3 | KCNE4    | 0.372429 | 1.02E-13 |
| AC007608.1_vs_AL391422.3 | DOCK10   | 0.342166 | 1.10E-11 |
| AC007608.1_vs_AL391422.3 | PID1     | 0.304947 | 1.81E-09 |
| AC007608.1_vs_AL391422.3 | COL6A3   | 0.381531 | 2.26E-14 |
| AC007608.1_vs_AL391422.3 | SNED1    | 0.30083  | 3.06E-09 |
| AC007608.1_vs_AL391422.3 | RBMS3    | 0.310802 | 8.51E-10 |
| AC007608.1_vs_AL391422.3 | PTH1R    | 0.318976 | 2.88E-10 |
| AC027130.1_vs_AL391422.3 | COL7A1   | 0.303625 | 2.15E-09 |
| AC007608.1_vs_AL391422.3 | PDZRN3   | 0.303381 | 2.22E-09 |
| AC007608.1_vs_AL391422.3 | COL8A1   | 0.355443 | 1.51E-12 |
| AC007608.1_vs_AL391422.3 | FILIP1L  | 0.352254 | 2.45E-12 |
| AC007608.1_vs_AL391422.3 | ARHGAP31 | 0.376371 | 5.35E-14 |
| AC007608.1_vs_AL391422.3 | FSTL1    | 0.301062 | 2.97E-09 |
| AC007608.1_vs_AL391422.3 | HEG1     | 0.348775 | 4.14E-12 |
| AC007608.1_vs_AL391422.3 | PLXND1   | 0.314744 | 5.07E-10 |
| AC007608.1_vs_AL391422.3 | CLDN11   | 0.351732 | 2.65E-12 |
| AC007608.1_vs_AL391422.3 | CHRD     | 0.429476 | 0        |
| AC007608.1_vs_AL391422.3 | GP5      | 0.306444 | 1.50E-09 |
| AC007608.1_vs_AL391422.3 | EVC      | 0.33434  | 3.42E-11 |
| AC007608.1_vs_AL391422.3 | CPZ      | 0.302802 | 2.38E-09 |
| AC007608.1_vs_AL391422.3 | NKX3-2   | 0.306804 | 1.43E-09 |
| AC007608.1_vs_AL391422.3 | C1QTNF7  | 0.371907 | 1.11E-13 |
| AC007608.1_vs_AL391422.3 | LDB2     | 0.318049 | 3.26E-10 |
| AC007608.1_vs_AL391422.3 | PDGFRA   | 0.428027 | 0        |
| AC007608.1_vs_AL391422.3 | HOPX     | 0.324484 | 1.36E-10 |
| AC007608.1_vs_AL391422.3 | ANTXR2   | 0.411968 | 0        |
| AC007608.1_vs_AL391422.3 | PRDM8    | 0.383676 | 1.58E-14 |
| AC007608.1_vs_AL391422.3 | SPARCL1  | 0.324716 | 1.32E-10 |
| AC007608.1_vs_AL391422.3 | DKK2     | 0.303265 | 2.25E-09 |
| AC007608.1_vs_AL391422.3 | NDNF     | 0.342804 | 1.01E-11 |
| AC007608.1_vs_AL391422.3 | FAT4     | 0.342398 | 1.07E-11 |
| AC007608.1_vs_AL391422.3 | GASK1B   | 0.397648 | 1.33E-15 |
| AC007608.1_vs_AL391422.3 | PALLD    | 0.316078 | 4.24E-10 |
| AC007608.1_vs_AL391422.3 | PDLIM3   | 0.321933 | 1.93E-10 |
| AC007608.1_vs_AL391422.3 | NKD2     | 0.345355 | 6.90E-12 |
| AC007608.1_vs_AL391422.3 | ADAMTS12 | 0.303207 | 2.27E-09 |
| AC007608.1_vs_AL391422.3 | GDNF     | 0.32002  | 2.50E-10 |
| AC007608.1_vs_AL391422.3 | DAB2     | 0.321006 | 2.19E-10 |
| AC007608.1_vs_AL391422.3 | FGF10    | 0.314425 | 5.29E-10 |
| AC007608.1_vs_AL391422.3 | ITGA1    | 0.304193 | 2.00E-09 |
| AC007608.1_vs_AL391422.3 | ZNF366   | 0.305932 | 1.60E-09 |

---

---

|                          |          |          |          |
|--------------------------|----------|----------|----------|
| AC007608.1_vs_AL391422.3 | RASGRF2  | 0.433592 | 0        |
| AC007608.1_vs_AL391422.3 | VCAN     | 0.348138 | 4.56E-12 |
| AC007608.1_vs_AL391422.3 | SPATA9   | 0.327268 | 9.25E-11 |
| AC007608.1_vs_AL391422.3 | TICAM2   | 0.303114 | 2.29E-09 |
| AC007608.1_vs_AL391422.3 | PRDM6    | 0.320136 | 2.46E-10 |
| AC007608.1_vs_AL391422.3 | CHSY3    | 0.343964 | 8.48E-12 |
| AC007608.1_vs_AL391422.3 | SEPTIN8  | 0.306686 | 1.45E-09 |
| AC007608.1_vs_AL391422.3 | TGFBI    | 0.338166 | 1.98E-11 |
| AC007608.1_vs_AL391422.3 | PCDHGA9  | 0.310106 | 9.32E-10 |
| AC007608.1_vs_AL391422.3 | PDGFRB   | 0.360602 | 6.76E-13 |
| AC007608.1_vs_AL391422.3 | SPARC    | 0.325644 | 1.16E-10 |
| AC007608.1_vs_AL391422.3 | GALNT10  | 0.326339 | 1.05E-10 |
| AC007608.1_vs_AL391422.3 | INSYN2B  | 0.346617 | 5.72E-12 |
| AC007608.1_vs_AL391422.3 | SH3PXD2B | 0.349123 | 3.93E-12 |
| AC007608.1_vs_AL391422.3 | GFPT2    | 0.311498 | 7.77E-10 |
| AC007608.1_vs_AL391422.3 | F13A1    | 0.327499 | 8.96E-11 |
| AC007608.1_vs_AL391422.3 | PPP1R18  | 0.315092 | 4.84E-10 |
| AC007608.1_vs_AL391422.3 | PPARD    | 0.303787 | 2.10E-09 |
| AC007608.1_vs_AL391422.3 | PTK7     | 0.307092 | 1.38E-09 |
| AC007608.1_vs_AL391422.3 | TRAM2    | 0.3057   | 1.65E-09 |
| AC007608.1_vs_AL391422.3 | PRDM1    | 0.368255 | 2.01E-13 |
| AC007608.1_vs_AL391422.3 | COL10A1  | 0.333412 | 3.90E-11 |
| AC007608.1_vs_AL391422.3 | TMEM200A | 0.421302 | 0        |
| AC007608.1_vs_AL391422.3 | ENPP1    | 0.3166   | 3.96E-10 |
| AC007608.1_vs_AL391422.3 | SYNE1    | 0.371328 | 1.22E-13 |
| AC007608.1_vs_AL391422.3 | FNDC1    | 0.441013 | 0        |
| AC007608.1_vs_AL391422.3 | PDE10A   | 0.327383 | 9.11E-11 |
| AC007608.1_vs_AL391422.3 | SMOC2    | 0.335847 | 2.76E-11 |
| AC007608.1_vs_AL391422.3 | THBS2    | 0.308715 | 1.12E-09 |
| AC007608.1_vs_AL391422.3 | CYTH3    | 0.331789 | 4.91E-11 |
| AC007608.1_vs_AL391422.3 | ETV1     | 0.413939 | 0        |
| AC007608.1_vs_AL391422.3 | SFRP4    | 0.386285 | 1.02E-14 |
| AC007608.1_vs_AL391422.3 | AEBP1    | 0.410982 | 0        |
| AC007608.1_vs_AL391422.3 | KCTD7    | 0.306396 | 1.51E-09 |
| AC027130.1_vs_AL391422.3 | SPDYE5   | 0.31826  | 3.17E-10 |
| AC007608.1_vs_AL391422.3 | HGF      | 0.316542 | 3.99E-10 |
| AC007608.1_vs_AL391422.3 | ABCB4    | 0.325006 | 1.27E-10 |
| AC007608.1_vs_AL391422.3 | FZD1     | 0.358457 | 9.45E-13 |
| AC027130.1_vs_AL391422.3 | ERVW-1   | 0.303608 | 2.15E-09 |
| AC007608.1_vs_AL391422.3 | COL1A2   | 0.370284 | 1.45E-13 |
| AC007608.1_vs_AL391422.3 | PCOLCE   | 0.312773 | 6.57E-10 |
| AC027130.1_vs_AL391422.3 | SPDYE6   | 0.316199 | 4.18E-10 |
| AC027130.1_vs_AL391422.3 | SPDYE2   | 0.331178 | 5.36E-11 |
| AC007608.1_vs_AL391422.3 | LAMB1    | 0.301468 | 2.82E-09 |

---

---

|                          |             |          |          |
|--------------------------|-------------|----------|----------|
| AC007608.1_vs_AL391422.3 | CALD1       | 0.315788 | 4.41E-10 |
| AC007608.1_vs_AL391422.3 | FAM180A     | 0.306048 | 1.58E-09 |
| AC007608.1_vs_AL391422.3 | DGKI        | 0.313121 | 6.28E-10 |
| AC007608.1_vs_AL391422.3 | CRYGN       | 0.305237 | 1.75E-09 |
| AC007608.1_vs_AL391422.3 | LZTS1       | 0.300135 | 3.34E-09 |
| AC007608.1_vs_AL391422.3 | ADGRA2      | 0.436259 | 0        |
| AC007608.1_vs_AL391422.3 | SNAI2       | 0.326687 | 1.00E-10 |
| AC007608.1_vs_AL391422.3 | MSC         | 0.301178 | 2.93E-09 |
| AC007608.1_vs_AL391422.3 | ZFHX4       | 0.321064 | 2.17E-10 |
| AC007608.1_vs_AL391422.3 | CPQ         | 0.301642 | 2.76E-09 |
| AC007608.1_vs_AL391422.3 | CTHRC1      | 0.323962 | 1.46E-10 |
| AC007608.1_vs_AL391422.3 | CCN4        | 0.38414  | 1.47E-14 |
| AC007608.1_vs_AL391422.3 | ADAMTSL1    | 0.301062 | 2.97E-09 |
| AC007608.1_vs_AL391422.3 | TMEM215     | 0.351096 | 2.92E-12 |
| AC007608.1_vs_AL391422.3 | RUSC2       | 0.308541 | 1.14E-09 |
| AC007608.1_vs_AL391422.3 | OMD         | 0.328198 | 8.13E-11 |
| AC007608.1_vs_AL391422.3 | ECM2        | 0.371328 | 1.22E-13 |
| AC007608.1_vs_AL391422.3 | PALM2-AKAP2 | 0.328323 | 7.99E-11 |
| AC007608.1_vs_AL391422.3 | TLR4        | 0.315092 | 4.84E-10 |
| AC007608.1_vs_AL391422.3 | ANGPTL2     | 0.340137 | 1.48E-11 |
| AC007608.1_vs_AL391422.3 | ENG         | 0.39243  | 3.55E-15 |
| AC007608.1_vs_AL391422.3 | MYMK        | 0.318771 | 2.96E-10 |
| AC007608.1_vs_AL391422.3 | ADAMTSL2    | 0.364776 | 3.50E-13 |
| AC007608.1_vs_AL391422.3 | COL5A1      | 0.358167 | 9.88E-13 |
| AC007608.1_vs_AL391422.3 | CELF2       | 0.319614 | 2.64E-10 |
| AC007608.1_vs_AL391422.3 | ITGA8       | 0.331499 | 5.12E-11 |
| AC007608.1_vs_AL391422.3 | ZEB1        | 0.415678 | 0        |
| AC007608.1_vs_AL391422.3 | ITGB1       | 0.307613 | 1.29E-09 |
| AC007608.1_vs_AL391422.3 | ZNF25       | 0.30083  | 3.06E-09 |
| AC007608.1_vs_AL391422.3 | CSGALNACT2  | 0.333412 | 3.90E-11 |
| AC007608.1_vs_AL391422.3 | WDFY4       | 0.323904 | 1.47E-10 |
| AC007608.1_vs_AL391422.3 | VSTM4       | 0.363385 | 4.37E-13 |
| AC027130.1_vs_AL391422.3 | AGAP6       | 0.304175 | 2.00E-09 |
| AC007608.1_vs_AL391422.3 | BICC1       | 0.313817 | 5.73E-10 |
| AC007608.1_vs_AL391422.3 | ZNF365      | 0.308309 | 1.18E-09 |
| AC027130.1_vs_AL391422.3 | AGAP5       | 0.308023 | 1.22E-09 |
| AC007608.1_vs_AL391422.3 | ZCCHC24     | 0.355906 | 1.40E-12 |
| AC007608.1_vs_AL391422.3 | STAMBPL1    | 0.326687 | 1.00E-10 |
| AC007608.1_vs_AL391422.3 | HTR7        | 0.340581 | 1.39E-11 |
| AC007608.1_vs_AL391422.3 | MARVELD1    | 0.32431  | 1.39E-10 |
| AC007608.1_vs_AL391422.3 | SFXN3       | 0.30141  | 2.84E-09 |
| AC007608.1_vs_AL391422.3 | WBP1L       | 0.320484 | 2.35E-10 |
| AC007608.1_vs_AL391422.3 | SH3PXD2A    | 0.303207 | 2.27E-09 |
| AC007608.1_vs_AL391422.3 | HTRA1       | 0.337702 | 2.11E-11 |

---

---

|                          |          |          |          |
|--------------------------|----------|----------|----------|
| AC007608.1_vs_AL391422.3 | CHST15   | 0.328484 | 7.81E-11 |
| AC007608.1_vs_AL391422.3 | PTPRE    | 0.313527 | 5.95E-10 |
| AC007608.1_vs_AL391422.3 | OSBPL5   | 0.331035 | 5.46E-11 |
| AC007608.1_vs_AL391422.3 | DCHS1    | 0.35753  | 1.09E-12 |
| AC007608.1_vs_AL391422.3 | OLFML1   | 0.398576 | 1.33E-15 |
| AC007608.1_vs_AL391422.3 | SCUBE2   | 0.328832 | 7.44E-11 |
| AC007608.1_vs_AL391422.3 | AMPD3    | 0.304483 | 1.93E-09 |
| AC007608.1_vs_AL391422.3 | MRV11    | 0.461304 | 0        |
| AC007608.1_vs_AL391422.3 | DKK3     | 0.350109 | 3.39E-12 |
| AC007608.1_vs_AL391422.3 | CREB3L1  | 0.335789 | 2.78E-11 |
| AC027130.1_vs_AL391422.3 | BTBD18   | 0.307542 | 1.30E-09 |
| AC007608.1_vs_AL391422.3 | MS4A4E   | 0.302521 | 2.47E-09 |
| AC007608.1_vs_AL391422.3 | BEST1    | 0.31086  | 8.45E-10 |
| AC007608.1_vs_AL391422.3 | LRRN4CL  | 0.442347 | 0        |
| AC007608.1_vs_AL391422.3 | MRGPRF   | 0.372313 | 1.04E-13 |
| AC027130.1_vs_AL391422.3 | ARAP1    | 0.304862 | 1.83E-09 |
| AC007608.1_vs_AL391422.3 | ARAP1    | 0.318687 | 2.99E-10 |
| AC007608.1_vs_AL391422.3 | ARHGEF17 | 0.303439 | 2.20E-09 |
| AC007608.1_vs_AL391422.3 | P4HA3    | 0.327441 | 9.04E-11 |
| AC007608.1_vs_AL391422.3 | CLMP     | 0.400315 | 8.88E-16 |
| AC007608.1_vs_AL391422.3 | FLI1     | 0.324774 | 1.31E-10 |
| AC007608.1_vs_AL391422.3 | JAM3     | 0.305526 | 1.69E-09 |
| AC007608.1_vs_AL391422.3 | CACNA1C  | 0.351848 | 2.61E-12 |
| AC007608.1_vs_AL391422.3 | IFFO1    | 0.373994 | 7.90E-14 |
| AC007608.1_vs_AL391422.3 | PTHLH    | 0.366806 | 2.54E-13 |
| AC007608.1_vs_AL391422.3 | TSPAN11  | 0.346456 | 5.86E-12 |
| AC007608.1_vs_AL391422.3 | CNTN1    | 0.406808 | 2.22E-16 |
| AC007608.1_vs_AL391422.3 | ACVRL1   | 0.36211  | 5.34E-13 |
| AC007608.1_vs_AL391422.3 | ITGA5    | 0.332716 | 4.31E-11 |
| AC007608.1_vs_AL391422.3 | MMP19    | 0.330282 | 6.08E-11 |
| AC007608.1_vs_AL391422.3 | LRP1     | 0.398054 | 1.33E-15 |
| AC007608.1_vs_AL391422.3 | AGAP2    | 0.310048 | 9.39E-10 |
| AC007608.1_vs_AL391422.3 | MSRB3    | 0.348486 | 4.33E-12 |
| AC027130.1_vs_AL391422.3 | ZFC3H1   | 0.303763 | 2.11E-09 |
| AC007608.1_vs_AL391422.3 | GLIPR1   | 0.361472 | 5.90E-13 |
| AC007608.1_vs_AL391422.3 | NAV3     | 0.3893   | 6.00E-15 |
| AC007608.1_vs_AL391422.3 | LIN7A    | 0.309353 | 1.03E-09 |
| AC007608.1_vs_AL391422.3 | DCN      | 0.380488 | 2.71E-14 |
| AC007608.1_vs_AL391422.3 | PLXNC1   | 0.353008 | 2.18E-12 |
| AC007608.1_vs_AL391422.3 | ELK3     | 0.336427 | 2.54E-11 |
| AC007608.1_vs_AL391422.3 | ANO4     | 0.348839 | 4.10E-12 |
| AC007608.1_vs_AL391422.3 | GLT8D2   | 0.358051 | 1.01E-12 |
| AC007608.1_vs_AL391422.3 | NUAK1    | 0.317585 | 3.47E-10 |
| AC007608.1_vs_AL391422.3 | SSH1     | 0.315498 | 4.58E-10 |

---

---

|                          |            |          |          |
|--------------------------|------------|----------|----------|
| AC007608.1_vs_AL391422.3 | SH2B3      | 0.326107 | 1.09E-10 |
| AC027130.1_vs_AL391422.3 | HECTD4     | 0.300946 | 3.02E-09 |
| AC027130.1_vs_AL391422.3 | SETD1B     | 0.339629 | 1.60E-11 |
| AC007608.1_vs_AL391422.3 | RFLNA      | 0.301004 | 2.99E-09 |
| AC007608.1_vs_AL391422.3 | NCOR2      | 0.309237 | 1.04E-09 |
| AC007608.1_vs_AL391422.3 | STX2       | 0.31602  | 4.28E-10 |
| AC007608.1_vs_AL391422.3 | SHISA2     | 0.353066 | 2.17E-12 |
| AC007608.1_vs_AL391422.3 | LHFPL6     | 0.391271 | 4.44E-15 |
| AC007608.1_vs_AL391422.3 | RUBCNL     | 0.33463  | 3.28E-11 |
| AC007608.1_vs_AL391422.3 | CYSLTR2    | 0.355327 | 1.53E-12 |
| AC027130.1_vs_AL391422.3 | MYCBP2     | 0.300053 | 3.37E-09 |
| AC007608.1_vs_AL391422.3 | FAM155A    | 0.310657 | 8.68E-10 |
| AC007608.1_vs_AL391422.3 | RASA3      | 0.303033 | 2.32E-09 |
| AC007608.1_vs_AL391422.3 | MMP14      | 0.396315 | 1.78E-15 |
| AC027130.1_vs_AL391422.3 | AL136295.5 | 0.313657 | 5.85E-10 |
| AC027130.1_vs_AL391422.3 | LTB4R2     | 0.301014 | 2.99E-09 |
| AC007608.1_vs_AL391422.3 | FRMD6      | 0.3435   | 9.08E-12 |
| AC007608.1_vs_AL391422.3 | GNG2       | 0.374226 | 7.64E-14 |
| AC007608.1_vs_AL391422.3 | DACT1      | 0.372371 | 1.03E-13 |
| AC007608.1_vs_AL391422.3 | LTBP2      | 0.326687 | 1.00E-10 |
| AC007608.1_vs_AL391422.3 | FLRT2      | 0.328194 | 8.14E-11 |
| AC007608.1_vs_AL391422.3 | GPR132     | 0.302628 | 2.44E-09 |
| AC007608.1_vs_AL391422.3 | MAGEL2     | 0.322108 | 1.88E-10 |
| AC007608.1_vs_AL391422.3 | SPRED1     | 0.305468 | 1.70E-09 |
| AC007608.1_vs_AL391422.3 | THBS1      | 0.319092 | 2.83E-10 |
| AC007608.1_vs_AL391422.3 | FBN1       | 0.37556  | 6.13E-14 |
| AC007608.1_vs_AL391422.3 | NEDD4      | 0.302744 | 2.40E-09 |
| AC027130.1_vs_AL391422.3 | UBAP1L     | 0.307679 | 1.28E-09 |
| AC007608.1_vs_AL391422.3 | IGDCC4     | 0.369241 | 1.71E-13 |
| AC007608.1_vs_AL391422.3 | ITGA11     | 0.342978 | 9.80E-12 |
| AC007608.1_vs_AL391422.3 | ISLR       | 0.347732 | 4.84E-12 |
| AC007608.1_vs_AL391422.3 | SEMA7A     | 0.337296 | 2.24E-11 |
| AC007608.1_vs_AL391422.3 | ADAMTS7    | 0.32431  | 1.39E-10 |
| AC007608.1_vs_AL391422.3 | IL16       | 0.353587 | 2.00E-12 |
| AC007608.1_vs_AL391422.3 | TM6SF1     | 0.315324 | 4.69E-10 |
| AC027130.1_vs_AL391422.3 | CHD2       | 0.30287  | 2.36E-09 |
| AC007608.1_vs_AL391422.3 | CACNA1H    | 0.303149 | 2.28E-09 |
| AC027130.1_vs_AL391422.3 | UNKL       | 0.316474 | 4.02E-10 |
| AC007608.1_vs_AL391422.3 | TMEM204    | 0.329586 | 6.70E-11 |
| AC027130.1_vs_AL391422.3 | SRRM2      | 0.323276 | 1.60E-10 |
| AC007608.1_vs_AL391422.3 | MYH11      | 0.303903 | 2.07E-09 |
| AC007608.1_vs_AL391422.3 | XYLT1      | 0.309874 | 9.61E-10 |
| AC027130.1_vs_AL391422.3 | SMG1       | 0.313313 | 6.12E-10 |
| AC027130.1_vs_AL391422.3 | NPIPBA     | 0.322589 | 1.76E-10 |

---

---

|                          |           |          |          |
|--------------------------|-----------|----------|----------|
| AC007608.1_vs_AL391422.3 | ADCY7     | 0.325412 | 1.20E-10 |
| AC007608.1_vs_AL391422.3 | NKD1      | 0.364834 | 3.47E-13 |
| AC007608.1_vs_AL391422.3 | MMP2      | 0.350573 | 3.16E-12 |
| AC007608.1_vs_AL391422.3 | CES1      | 0.31521  | 4.76E-10 |
| AC007608.1_vs_AL391422.3 | KIFC3     | 0.311556 | 7.71E-10 |
| AC007608.1_vs_AL391422.3 | CDH11     | 0.395097 | 2.22E-15 |
| AC007608.1_vs_AL391422.3 | CMTM3     | 0.346804 | 5.56E-12 |
| AC007608.1_vs_AL391422.3 | CRISPLD2  | 0.304251 | 1.98E-09 |
| AC007608.1_vs_AL391422.3 | KIAA0513  | 0.312251 | 7.04E-10 |
| AC007608.1_vs_AL391422.3 | FOXF1     | 0.30599  | 1.59E-09 |
| AC007608.1_vs_AL391422.3 | ZNF469    | 0.399677 | 8.88E-16 |
| AC027130.1_vs_AL391422.3 | ZNF276    | 0.316543 | 3.99E-10 |
| AC007608.1_vs_AL391422.3 | SCARF1    | 0.346225 | 6.06E-12 |
| AC007608.1_vs_AL391422.3 | WDR81     | 0.342166 | 1.10E-11 |
| AC007608.1_vs_AL391422.3 | SERPINF1  | 0.347964 | 4.68E-12 |
| AC007608.1_vs_AL391422.3 | HIC1      | 0.414171 | 0        |
| AC027130.1_vs_AL391422.3 | TRPV1     | 0.354677 | 1.69E-12 |
| AC007608.1_vs_AL391422.3 | ZBTB4     | 0.309179 | 1.05E-09 |
| AC027130.1_vs_AL391422.3 | EIF4A1    | 0.327742 | 8.66E-11 |
| AC007608.1_vs_AL391422.3 | ARHGEF15  | 0.324426 | 1.37E-10 |
| AC007608.1_vs_AL391422.3 | GAS7      | 0.313005 | 6.38E-10 |
| AC106037.2_vs_AL391422.3 | ABHD15    | 0.301584 | 2.78E-09 |
| AC007608.1_vs_AL391422.3 | PLXDC1    | 0.31144  | 7.83E-10 |
| AC007608.1_vs_AL391422.3 | IGFBP4    | 0.329586 | 6.70E-11 |
| AC007608.1_vs_AL391422.3 | CAVIN1    | 0.320252 | 2.42E-10 |
| AC007608.1_vs_AL391422.3 | TMEM106A  | 0.327383 | 9.11E-11 |
| AC106037.2_vs_AL391422.3 | TMEM106A  | 0.304425 | 1.94E-09 |
| AC007608.1_vs_AL391422.3 | CCDC200   | 0.345355 | 6.90E-12 |
| AC007608.1_vs_AL391422.3 | SP6       | 0.32402  | 1.45E-10 |
| AC007608.1_vs_AL391422.3 | COL1A1    | 0.363269 | 4.45E-13 |
| AC007608.1_vs_AL391422.3 | CACNA1G   | 0.346283 | 6.01E-12 |
| AC007608.1_vs_AL391422.3 | MRC2      | 0.348428 | 4.36E-12 |
| AC007608.1_vs_AL391422.3 | ABCA8     | 0.364661 | 3.57E-13 |
| AC007608.1_vs_AL391422.3 | ABCA9     | 0.337007 | 2.34E-11 |
| AC007608.1_vs_AL391422.3 | ABCA6     | 0.35121  | 2.87E-12 |
| AC027130.1_vs_AL391422.3 | TEN1-CDK3 | 0.329116 | 7.15E-11 |
| AC027130.1_vs_AL391422.3 | CDK3      | 0.327193 | 9.35E-11 |
| AC007608.1_vs_AL391422.3 | CYTH1     | 0.305526 | 1.69E-09 |
| AC007608.1_vs_AL391422.3 | TIMP2     | 0.381879 | 2.13E-14 |
| AC007608.1_vs_AL391422.3 | CEP295NL  | 0.308432 | 1.16E-09 |
| AC007608.1_vs_AL391422.3 | C1QTNF1   | 0.399155 | 1.11E-15 |
| AC007608.1_vs_AL391422.3 | BAHCC1    | 0.311266 | 8.01E-10 |
| AC007608.1_vs_AL391422.3 | COLEC12   | 0.313411 | 6.04E-10 |
| AC007608.1_vs_AL391422.3 | TMEM200C  | 0.300714 | 3.10E-09 |

---

---

|                          |                |          |          |
|--------------------------|----------------|----------|----------|
| AC007608.1_vs_AL391422.3 | RAB31          | 0.314918 | 4.95E-10 |
| AC106037.2_vs_AL391422.3 | ABHD3          | 0.356892 | 1.20E-12 |
| AC007608.1_vs_AL391422.3 | TCF4           | 0.323904 | 1.47E-10 |
| AC007608.1_vs_AL391422.3 | DOK6           | 0.326745 | 9.95E-11 |
| AC007608.1_vs_AL391422.3 | KCNG2          | 0.332688 | 4.33E-11 |
| AC027130.1_vs_AL391422.3 | AC119396.1     | 0.312562 | 6.76E-10 |
| AC007608.1_vs_AL391422.3 | ADAMTS10       | 0.374806 | 6.93E-14 |
| AC007608.1_vs_AL391422.3 | CILP2          | 0.305179 | 1.76E-09 |
| AC007608.1_vs_AL391422.3 | RASGRP4        | 0.316947 | 3.78E-10 |
| AC007608.1_vs_AL391422.3 | AXL            | 0.329354 | 6.92E-11 |
| AC007608.1_vs_AL391422.3 | TGFB1          | 0.352312 | 2.43E-12 |
| AC007608.1_vs_AL391422.3 | DACT3          | 0.375328 | 6.35E-14 |
| AC007608.1_vs_AL391422.3 | MEIS3          | 0.342166 | 1.10E-11 |
| AC007608.1_vs_AL391422.3 | LRRC4B         | 0.31573  | 4.44E-10 |
| AC007608.1_vs_AL391422.3 | SSC5D          | 0.379502 | 3.20E-14 |
| AC007608.1_vs_AL391422.3 | ANGPT4         | 0.320196 | 2.44E-10 |
| AC007608.1_vs_AL391422.3 | LAMP5          | 0.322803 | 1.71E-10 |
| AC007608.1_vs_AL391422.3 | ISM1           | 0.397474 | 1.33E-15 |
| AC007608.1_vs_AL391422.3 | RIN2           | 0.332659 | 4.34E-11 |
| AC007608.1_vs_AL391422.3 | CD93           | 0.332253 | 4.60E-11 |
| AC027130.1_vs_AL391422.3 | ZNF337         | 0.309053 | 1.07E-09 |
| AC027130.1_vs_AL391422.3 | MYH7B          | 0.303557 | 2.17E-09 |
| AC007608.1_vs_AL391422.3 | NNAT           | 0.317179 | 3.66E-10 |
| AC007608.1_vs_AL391422.3 | KIAA1755       | 0.326629 | 1.01E-10 |
| AC007608.1_vs_AL391422.3 | MAFB           | 0.322803 | 1.71E-10 |
| AC007608.1_vs_AL391422.3 | ZHX3           | 0.305005 | 1.80E-09 |
| AC007608.1_vs_AL391422.3 | SULF2          | 0.315092 | 4.84E-10 |
| AC007608.1_vs_AL391422.3 | PTGIS          | 0.36953  | 1.64E-13 |
| AC007608.1_vs_AL391422.3 | CASS4          | 0.329934 | 6.38E-11 |
| AC027130.1_vs_AL391422.3 | RTEL1-TNFRSF6B | 0.301633 | 2.77E-09 |
| AC007608.1_vs_AL391422.3 | COL6A1         | 0.343616 | 8.92E-12 |
| AC007608.1_vs_AL391422.3 | COL6A2         | 0.367617 | 2.22E-13 |
| AC007608.1_vs_AL391422.3 | SCARF2         | 0.314107 | 5.51E-10 |
| AC007608.1_vs_AL391422.3 | TIMP3          | 0.316542 | 3.99E-10 |
| AC007608.1_vs_AL391422.3 | C1QTNF6        | 0.314049 | 5.56E-10 |
| AC007608.1_vs_AL391422.3 | TAFA5          | 0.317527 | 3.50E-10 |
| AC007608.1_vs_AL391422.3 | ARSE           | 0.364777 | 3.50E-13 |
| AC007608.1_vs_AL391422.3 | HEPH           | 0.412026 | 0        |
| AC007608.1_vs_AL391422.3 | EDA2R          | 0.318803 | 2.95E-10 |
| AC007608.1_vs_AL391422.3 | STARD8         | 0.330455 | 5.93E-11 |
| AC007608.1_vs_AL391422.3 | LPAR4          | 0.320513 | 2.34E-10 |
| AC007608.1_vs_AL391422.3 | SRPX2          | 0.389184 | 6.22E-15 |
| AC007608.1_vs_AL391422.3 | SYTL4          | 0.321006 | 2.19E-10 |
| AC007608.1_vs_AL391422.3 | DRP2           | 0.307237 | 1.35E-09 |

---



---

|                          |            |          |          |
|--------------------------|------------|----------|----------|
| AC007608.1_vs_AL391422.3 | NRK        | 0.388517 | 6.88E-15 |
| AC007608.1_vs_AL391422.3 | ARHGEF6    | 0.30999  | 9.47E-10 |
| AC027130.1_vs_AL391422.3 | AC244197.3 | 0.301976 | 2.65E-09 |
| AC007608.1_vs_AL391422.3 | BGN        | 0.359559 | 7.96E-13 |

---
