# Supplementary material for: Immune Subtype Profiling and Establishment of Prognostic Immune-Related lncRNA Pairs in Human Ovarian Cancer
Source: PubMed Central journal article supplement (PMC9107039; doi:10.1155/2022/8338137), 2022-05-05
Supplement: 8338137.f10.pdf [file 8338137.f10.pdf]

Supplementary Table9: Enrichment analysis and tumor-related pathways.

| gene Set   | description                                            | enrichmentRatio | pValue   | FD        | DB                              |
|------------|--------------------------------------------------------|-----------------|----------|-----------|---------------------------------|
| hsa04512   | ECM-receptor interaction                               | 10.10875        | 3.17E-13 | 9.45E-11  | pathway_KEGG                    |
| hsa04510   | Focal adhesion                                         | 4.816522        | 8.21E-09 | 1.22E-06  | pathway_KEGG                    |
| hsa04151   | PI3K-Akt signaling pathway                             | 3.471367        | 5.01E-08 | 4.97E-06  | pathway_KEGG                    |
| hsa04974   | Protein digestion and absorption                       | 7.410033        | 6.89E-07 | 5.13E-05  | pathway_KEGG                    |
| hsa05165   | Human papillomavirus infection                         | 3.030262        | 1.14E-05 | 0.000681  | pathway_KEGG                    |
| hsa05205   | Proteoglycans in cancer                                | 3.684771        | 2.15E-05 | 0.001066  | pathway_KEGG                    |
| hsa05414   | Dilated cardiomyopathy (DCM)                           | 5.222734        | 4.75E-05 | 0.002023  | pathway_KEGG                    |
| hsa04810   | Regulation of actin cytoskeleton                       | 3.388508        | 5.47E-05 | 0.002039  | pathway_KEGG                    |
| hsa05410   | Hypertrophic cardiomyopathy (HCM)                      | 5.004178        | 0.00073  | 0.000512  | pathway_KEGG                    |
| hsa05144   | Malaria                                                | 6.422029        | 0.00096  | 0.000812  | pathway_KEGG                    |
| hsa05412   | Arrhythmogenic right ventricular cardiomyopathy (ARVC) | 5.108432        | 0.00092  | 0.0010621 | pathway_KEGG                    |
| GO:0043062 | extracellular structure organization                   | 7.487673        | 0        | 0         | geneontology_Biological_Process |
| GO:00301   | extracellular matrix organization                      | 8.588012        | 0        | 0         | geneontology_Biological_Pro     |

---

|      |                                                           |        |     |     |                |
|------|-----------------------------------------------------------|--------|-----|-----|----------------|
| 98   |                                                           |        |     |     | cess           |
| GO:0 |                                                           | 4.5102 | 2.2 | 4.2 | geneontology_  |
| 0015 | skeletal system development                               | 86     | 2E- | 0E- | Biological_Pro |
| 01   |                                                           |        | 13  | 10  | cess           |
| GO:0 |                                                           | 3.9878 | 2.9 | 4.2 | geneontology_  |
| 0485 | blood vessel morphogenesis                                | 57     | 7E- | 0E- | Biological_Pro |
| 14   |                                                           |        | 13  | 10  | cess           |
| GO:0 |                                                           | 10.875 | 8.1 | 9.2 | geneontology_  |
| 0329 | collagen metabolic process                                | 71     | 3E- | 0E- | Biological_Pro |
| 63   |                                                           |        | 13  | 10  | cess           |
| GO:0 |                                                           | 4.4931 | 1.0 | 1.0 | geneontology_  |
| 0015 | ossification                                              | 44     | 9E- | 3E- | Biological_Pro |
| 03   |                                                           |        | 10  | 07  | cess           |
| GO:0 |                                                           | 14.378 | 1.3 | 1.0 | geneontology_  |
| 0359 | endodermal cell differentiation                           | 95     | 0E- | 5E- | Biological_Pro |
| 87   |                                                           |        | 10  | 07  | cess           |
| GO:0 |                                                           | 5.2737 | 4.1 | 2.3 | geneontology_  |
| 0902 | regulation of cellular response to growth factor stimulus | 83     | 5E- | 8E- | Biological_Pro |
| 87   |                                                           |        | 10  | 07  | cess           |
| GO:0 |                                                           | 13.041 | 4.1 | 2.3 | geneontology_  |
| 0017 | endoderm formation                                        | 37     | 7E- | 8E- | Biological_Pro |
| 06   |                                                           |        | 10  | 07  | cess           |
| GO:0 |                                                           | 15.448 | 4.2 | 2.3 | geneontology_  |
| 0329 | collagen biosynthetic process                             | 45     | 1E- | 8E- | Biological_Pro |
| 64   |                                                           |        | 10  | 07  | cess           |
| GO:0 |                                                           | 3.6960 | 9.0 | 4.5 | geneontology_  |
| 0015 | angiogenesis                                              | 43     | 5E- | 0E- | Biological_Pro |
| 25   |                                                           |        | 10  | 07  | cess           |
| GO:0 |                                                           | 3.5817 | 9.5 | 4.5 | geneontology_  |
| 0485 | embryonic morphogenesis                                   | 26     | 3E- | 0E- | Biological_Pro |
| 98   |                                                           |        | 10  | 07  | cess           |
| GO:0 |                                                           | 9.7104 | 2.5 | 1.1 | geneontology_  |
| 0074 | endoderm development                                      | 57     | 9E- | 3E- | Biological_Pro |
| 92   |                                                           |        | 09  | 06  | cess           |
| GO:0 |                                                           | 7.5128 | 4.0 | 1.6 | geneontology_  |
| 0017 | formation of primary germ layer                           | 27     | 0E- | 2E- | Biological_Pro |
| 04   |                                                           |        | 09  | 06  | cess           |
| GO:0 |                                                           | 4.1233 | 1.6 | 6.1 | geneontology_  |
| 0315 | cell-substrate adhesion                                   | 74     | 2E- | 2E- | Biological_Pro |
| 89   |                                                           |        | 08  | 06  | cess           |
| GO:0 |                                                           | 5.1281 | 3.1 | 1.1 | geneontology_  |
| 0016 | osteoblast differentiation                                | 56     | 9E- | 3E- | Biological_Pro |
| 49   |                                                           |        | 08  | 05  | cess           |
| GO:0 | transmembrane receptor protein                            | 4.0861 | 4.1 | 1.3 | geneontology_  |

---

|      |                                           |        |     |     |                |
|------|-------------------------------------------|--------|-----|-----|----------------|
| 0071 | serine/threonine kinase signaling         | 75     | 1E- | 7E- | Biological_Pro |
| 78   | pathway                                   |        | 08  | 05  | cess           |
| GO:0 |                                           | 4.7058 | 4.7 | 1.4 | geneontology_  |
| 0614 | connective tissue development             | 37     | 3E- | 9E- | Biological_Pro |
| 48   |                                           |        | 08  | 05  | cess           |
| GO:0 |                                           | 5.1954 | 6.8 | 1.9 | geneontology_  |
| 0071 | transforming growth factor beta receptor  | 04     | 5E- | 8E- | Biological_Pro |
| 79   | signaling pathway                         |        | 08  | 05  | cess           |
| GO:0 |                                           | 4.5881 | 6.9 | 1.9 | geneontology_  |
| 0715 | cellular response to transforming growth  | 91     | 9E- | 8E- | Biological_Pro |
| 60   | factor beta stimulus                      |        | 08  | 05  | cess           |
| GO:0 |                                           | 4.4762 | 1.0 | 2.6 | geneontology_  |
| 0715 | response to transforming growth factor    | 84     | 2E- | 2E- | Biological_Pro |
| 59   | beta                                      |        | 07  | 05  | cess           |
| GO:0 |                                           | 13.156 | 1.0 | 2.6 | geneontology_  |
| 0107 | regulation of collagen metabolic process  | 1      | 2E- | 2E- | Biological_Pro |
| 12   |                                           |        | 07  | 05  | cess           |
| GO:0 |                                           | 6.1938 | 1.5 | 3.8 | geneontology_  |
| 0902 | negative regulation of cellular response  | 2      | 5E- | 1E- | Biological_Pro |
| 88   | to growth factor stimulus                 |        | 07  | 05  | cess           |
| GO:0 |                                           | 3.2512 | 1.8 | 4.2 | geneontology_  |
| 0074 | sensory organ development                 | 69     | 1E- | 6E- | Biological_Pro |
| 23   |                                           |        | 07  | 05  | cess           |
| GO:0 |                                           | 5.1668 | 1.9 | 4.3 | geneontology_  |
| 0603 | bone development                          | 82     | 2E- | 6E- | Biological_Pro |
| 48   |                                           |        | 07  | 05  | cess           |
| GO:0 |                                           | 3.0753 | 2.9 | 6.5 | geneontology_  |
| 0075 | heart development                         | 54     | 9E- | 1E- | Biological_Pro |
| 07   |                                           |        | 07  | 05  | cess           |
| GO:0 |                                           | 4.6610 | 3.1 | 6.5 | geneontology_  |
| 0900 | regulation of transmembrane receptor      | 19     | 0E- | 1E- | Biological_Pro |
| 92   | protein serine/threonine kinase signaling |        | 07  | 05  | cess           |
| GO:0 |                                           | 7.8430 | 4.7 | 9.5 | geneontology_  |
| 0226 | extracellular matrix disassembly          | 61     | 1E- | 3E- | Biological_Pro |
| 17   |                                           |        | 07  | 05  | cess           |
| GO:0 |                                           | 2.9853 | 5.3 | 0.0 | geneontology_  |
| 0420 | wound healing                             | 09     | 1E- | 001 | Biological_Pro |
| 60   |                                           |        | 07  | 04  | cess           |
| GO:0 |                                           | 13.217 | 6.4 | 0.0 | geneontology_  |
| 0329 | regulation of collagen biosynthetic       | 01     | 0E- | 001 | Biological_Pro |
| 65   | process                                   |        | 07  | 17  | cess           |
| GO:0 |                                           | 25.489 | 6.4 | 0.0 | geneontology_  |
| 0702 | protein heterotrimerization               | 95     | 3E- | 001 | Biological_Pro |
| 08   |                                           |        | 07  | 17  | cess           |

---

|                    |                                                                                |              |                  |                  |                                         |
|--------------------|--------------------------------------------------------------------------------|--------------|------------------|------------------|-----------------------------------------|
| GO:2<br>0001<br>81 | negative regulation of blood vessel<br>morphogenesis                           | 6.5973<br>99 | 7.5<br>4E-<br>07 | 0.0<br>001<br>33 | geneontology_<br>Biological_Pro<br>cess |
| GO:0<br>0487<br>29 | tissue morphogenesis                                                           | 2.8439<br>2  | 8.1<br>7E-<br>07 | 0.0<br>001<br>4  | geneontology_<br>Biological_Pro<br>cess |
| GO:0<br>0073<br>69 | gastrulation                                                                   | 4.9221<br>97 | 9.0<br>4E-<br>07 | 0.0<br>001<br>5  | geneontology_<br>Biological_Pro<br>cess |
| GO:0<br>0016<br>54 | eye development                                                                | 3.6551<br>63 | 1.0<br>5E-<br>06 | 0.0<br>001<br>7  | geneontology_<br>Biological_Pro<br>cess |
| GO:0<br>1500<br>63 | visual system development                                                      | 3.6414<br>21 | 1.1<br>1E-<br>06 | 0.0<br>001<br>75 | geneontology_<br>Biological_Pro<br>cess |
| GO:0<br>0488<br>80 | sensory system development                                                     | 3.6008<br>11 | 1.3<br>2E-<br>06 | 0.0<br>002<br>02 | geneontology_<br>Biological_Pro<br>cess |
| GO:0<br>0170<br>15 | regulation of transforming growth factor<br>beta receptor signaling pathway    | 6.1624<br>05 | 1.5<br>1E-<br>06 | 0.0<br>002<br>25 | geneontology_<br>Biological_Pro<br>cess |
| GO:0<br>0512<br>16 | cartilage development                                                          | 4.6955<br>17 | 1.6<br>0E-<br>06 | 0.0<br>002<br>32 | geneontology_<br>Biological_Pro<br>cess |
| GO:1<br>9038<br>44 | regulation of cellular response to<br>transforming growth factor beta stimulus | 6.0298<br>81 | 1.8<br>8E-<br>06 | 0.0<br>002<br>66 | geneontology_<br>Biological_Pro<br>cess |
| GO:0<br>0359<br>04 | aorta development                                                              | 9.0630<br>93 | 2.2<br>0E-<br>06 | 0.0<br>003<br>04 | geneontology_<br>Biological_Pro<br>cess |
| GO:1<br>9013<br>43 | negative regulation of vasculature<br>development                              | 5.8414<br>47 | 2.5<br>8E-<br>06 | 0.0<br>003<br>48 | geneontology_<br>Biological_Pro<br>cess |
| GO:0<br>0465<br>78 | regulation of Ras protein signal<br>transduction                               | 4.1335<br>05 | 3.3<br>6E-<br>06 | 0.0<br>004<br>43 | geneontology_<br>Biological_Pro<br>cess |
| GO:0<br>0457<br>65 | regulation of angiogenesis                                                     | 3.6879<br>08 | 3.5<br>3E-<br>06 | 0.0<br>004<br>55 | geneontology_<br>Biological_Pro<br>cess |
| GO:0<br>0060<br>24 | glycosaminoglycan biosynthetic process                                         | 8.4966<br>5  | 3.6<br>7E-<br>06 | 0.0<br>004<br>61 | geneontology_<br>Biological_Pro<br>cess |
| GO:1<br>9013       | regulation of vasculature development                                          | 3.5024<br>36 | 3.7<br>6E-       | 0.0<br>004       | geneontology_<br>Biological_Pro         |

---

---

|      |                                                         |        |     |     |                |
|------|---------------------------------------------------------|--------|-----|-----|----------------|
| 42   |                                                         |        | 06  | 62  | cess           |
| GO:0 |                                                         | 8.3232 | 4.3 | 0.0 | geneontology_  |
| 0060 | aminoglycan biosynthetic process                        |        | 1E- | 005 | Biological_Pro |
| 23   |                                                         | 49     | 06  | 08  | cess           |
| GO:0 |                                                         | 8.3232 | 4.3 | 0.0 | geneontology_  |
| 0712 | cellular response to amino acid stimulus                |        | 1E- | 005 | Biological_Pro |
| 30   |                                                         | 49     | 06  | 08  | cess           |
| GO:0 |                                                         | 6.1421 | 4.7 | 0.0 | geneontology_  |
| 0165 | negative regulation of angiogenesis                     |        | 1E- | 005 | Biological_Pro |
| 25   |                                                         | 57     | 06  | 45  | cess           |
| GO:0 |                                                         | 3.1276 | 6.0 | 0.0 | geneontology_  |
| 0016 | ameboidal-type cell migration                           |        | 0E- | 006 | Biological_Pro |
| 67   |                                                         | 01     | 06  | 79  | cess           |
| GO:0 |                                                         | 5.9278 | 6.5 | 0.0 | geneontology_  |
| 0020 | chondrocyte differentiation                             |        | 2E- | 007 | Biological_Pro |
| 62   |                                                         | 95     | 06  | 24  | cess           |
| GO:0 |                                                         | 7.8430 | 6.8 | 0.0 | geneontology_  |
| 0488 | artery morphogenesis                                    |        | 4E- | 007 | Biological_Pro |
| 44   |                                                         | 61     | 06  | 44  | cess           |
| GO:0 |                                                         | 3.3368 | 7.3 | 0.0 | geneontology_  |
| 0510 | regulation of small GTPase mediated signal transduction |        | 9E- | 007 | Biological_Pro |
| 56   |                                                         | 66     | 06  | 89  | cess           |
| GO:0 |                                                         | 11.764 | 8.7 | 0.0 | geneontology_  |
| 0359 | aorta morphogenesis                                     |        | 7E- | 009 | Biological_Pro |
| 09   |                                                         | 59     | 06  | 19  | cess           |
| GO:0 |                                                         | 9.1502 | 9.0 | 0.0 | geneontology_  |
| 0105 | negative regulation of endothelial cell migration       |        | 8E- | 009 | Biological_Pro |
| 96   |                                                         | 38     | 06  | 35  | cess           |
| GO:0 |                                                         | 4.0323 | 9.5 | 0.0 | geneontology_  |
| 0487 | skeletal system morphogenesis                           |        | 9E- | 009 | Biological_Pro |
| 05   |                                                         | 08     | 06  | 69  | cess           |
| GO:0 |                                                         | 6.3724 | 1.0 | 0.0 | geneontology_  |
| 0608 | artery development                                      |        | 5E- | 010 | Biological_Pro |
| 40   |                                                         | 87     | 05  | 43  | cess           |
| GO:0 |                                                         | 6.2851 | 1.1 | 0.0 | geneontology_  |
| 0302 | glycosaminoglycan metabolic process                     |        | 8E- | 011 | Biological_Pro |
| 03   |                                                         | 93     | 05  | 49  | cess           |
| GO:0 |                                                         | 8.7038 | 1.2 | 0.0 | geneontology_  |
| 0301 | collagen fibril organization                            |        | 8E- | 012 | Biological_Pro |
| 99   |                                                         | 85     | 05  | 32  | cess           |
| GO:1 |                                                         | 10.924 | 1.3 | 0.0 | geneontology_  |
| 9030 | regulation of extracellular matrix organization         |        | 9E- | 013 | Biological_Pro |
| 53   |                                                         | 26     | 05  | 03  | cess           |
| GO:0 | cell-matrix adhesion                                    | 3.9001 | 1.4 | 0.0 | geneontology_  |

---

|      |                                                       |        |     |     |                |
|------|-------------------------------------------------------|--------|-----|-----|----------------|
| 0071 |                                                       | 02     | 0E- | 013 | Biological_Pro |
| 60   |                                                       |        | 05  | 03  | cess           |
| GO:0 |                                                       | 3.6588 | 1.4 | 0.0 | geneontology_  |
| 0604 | mesenchyme development                                |        | 9E- | 013 | Biological_Pro |
| 85   |                                                       | 44     | 05  | 56  | cess           |
| GO:0 |                                                       | 8.4966 | 1.5 | 0.0 | geneontology_  |
| 0702 | protein trimerization                                 |        | 2E- | 013 | Biological_Pro |
| 06   |                                                       | 5      | 05  | 62  | cess           |
| GO:0 |                                                       | 6.0370 | 1.6 | 0.0 | geneontology_  |
| 0060 | aminoglycan metabolic process                         |        | 4E- | 014 | Biological_Pro |
| 22   |                                                       | 93     | 05  | 53  | cess           |
| GO:0 |                                                       | 10.547 | 1.7 | 0.0 | geneontology_  |
| 0181 | peptide cross-linking                                 |        | 2E- | 015 | Biological_Pro |
| 49   |                                                       | 57     | 05  | 015 | cess           |
| GO:0 |                                                       | 14.161 | 1.9 | 0.0 | geneontology_  |
| 0107 | positive regulation of collagen metabolic process     |        | 2E- | 016 | Biological_Pro |
| 14   |                                                       | 08     | 05  | 24  | cess           |
| GO:0 |                                                       | 14.161 | 1.9 | 0.0 | geneontology_  |
| 0329 | positive regulation of collagen biosynthetic process  |        | 2E- | 016 | Biological_Pro |
| 67   |                                                       | 08     | 05  | 24  | cess           |
| GO:0 |                                                       | 3.7367 | 2.2 | 0.0 | geneontology_  |
| 0303 | negative regulation of cell migration                 |        | 8E- | 018 | Biological_Pro |
| 36   |                                                       | 47     | 05  | 95  | cess           |
| GO:0 |                                                       | 3.9215 | 2.7 | 0.0 | geneontology_  |
| 0487 | mesenchymal cell differentiation                      |        | 0E- | 022 | Biological_Pro |
| 62   |                                                       | 31     | 05  | 02  | cess           |
| GO:0 |                                                       | 2.5826 | 2.7 | 0.0 | geneontology_  |
| 0072 | small GTPase mediated signal transduction             |        | 2E- | 022 | Biological_Pro |
| 64   |                                                       | 82     | 05  | 02  | cess           |
| GO:0 |                                                       | 6.4736 | 2.9 | 0.0 | geneontology_  |
| 0305 | regulation of BMP signaling pathway                   |        | 3E- | 023 | Biological_Pro |
| 10   |                                                       | 38     | 05  | 33  | cess           |
| GO:0 |                                                       | 5.5279 | 3.3 | 0.0 | geneontology_  |
| 0603 | bone morphogenesis                                    |        | 7E- | 026 | Biological_Pro |
| 49   |                                                       | 41     | 05  | 47  | cess           |
| GO:0 |                                                       | 9.2690 | 3.7 | 0.0 | geneontology_  |
| 0305 | collagen catabolic process                            |        | 6E- | 029 | Biological_Pro |
| 74   |                                                       | 73     | 05  | 17  | cess           |
| GO:0 |                                                       | 18.538 | 4.2 | 0.0 | geneontology_  |
| 0302 | chondroitin sulfate biosynthetic process              |        | 6E- | 032 | Biological_Pro |
| 06   |                                                       | 15     | 05  | 12  | cess           |
| GO:0 |                                                       | 18.538 | 4.2 | 0.0 | geneontology_  |
| 0506 | chondroitin sulfate proteoglycan biosynthetic process |        | 6E- | 032 | Biological_Pro |
| 50   |                                                       | 15     | 05  | 12  | cess           |

---

|      |                                                                       |        |     |     |                |
|------|-----------------------------------------------------------------------|--------|-----|-----|----------------|
| GO:0 |                                                                       |        | 4.4 | 0.0 | geneontology_  |
| 0488 | inner ear development                                                 | 4.3471 | 4E- | 033 | Biological_Pro |
| 39   |                                                                       | 23     | 05  | 04  | cess           |
| GO:0 |                                                                       |        | 4.4 | 0.0 | geneontology_  |
| 0305 | negative regulation of BMP signaling pathway                          | 8.9964 | 9E- | 033 | Biological_Pro |
| 14   |                                                                       | 53     | 05  | 04  | cess           |
| GO:0 |                                                                       |        | 4.6 | 0.0 | geneontology_  |
| 0426 | muscle cell differentiation                                           | 3.0302 | 1E- | 033 | Biological_Pro |
| 92   |                                                                       | 74     | 05  | 45  | cess           |
| GO:2 |                                                                       |        | 4.7 | 0.0 | geneontology_  |
| 0001 | negative regulation of cell motility                                  | 3.4986 | 3E- | 033 | Biological_Pro |
| 46   |                                                                       | 21     | 05  | 87  | cess           |
| GO:0 |                                                                       |        | 4.8 | 0.0 | geneontology_  |
| 0512 | negative regulation of cellular component movement                    | 3.3103 | 0E- | 033 | Biological_Pro |
| 71   |                                                                       | 83     | 05  | 96  | cess           |
| GO:0 |                                                                       |        | 5.8 | 0.0 | geneontology_  |
| 0072 | integrin-mediated signaling pathway                                   | 5.1552 | 8E- | 041 | Biological_Pro |
| 29   |                                                                       | 71     | 05  | 12  | cess           |
| GO:0 |                                                                       |        | 7.0 | 0.0 | geneontology_  |
| 0106 | epithelial cell migration                                             | 3.1995 | 8E- | 048 | Biological_Pro |
| 31   |                                                                       | 75     | 05  | 88  | cess           |
| GO:0 |                                                                       |        | 7.3 | 0.0 | geneontology_  |
| 0905 | sensory organ morphogenesis                                           | 3.5631 | 4E- | 050 | Biological_Pro |
| 96   |                                                                       | 11     | 05  | 03  | cess           |
| GO:0 |                                                                       |        | 7.4 | 0.0 | geneontology_  |
| 0901 | epithelium migration                                                  | 3.1862 | 2E- | 050 | Biological_Pro |
| 32   |                                                                       | 44     | 05  | 03  | cess           |
| GO:0 |                                                                       |        | 7.5 | 0.0 | geneontology_  |
| 0712 | cellular response to acid chemical                                    | 3.7997 | 3E- | 050 | Biological_Pro |
| 29   |                                                                       | 44     | 05  | 13  | cess           |
| GO:0 |                                                                       |        | 7.6 | 0.0 | geneontology_  |
| 0329 | regulation of actin filament-based process                            | 2.9082 | 9E- | 050 | Biological_Pro |
| 70   |                                                                       | 49     | 05  | 62  | cess           |
| GO:0 |                                                                       |        | 8.1 | 0.0 | geneontology_  |
| 0106 | negative regulation of epithelial cell migration                      | 6.6085 | 6E- | 053 | Biological_Pro |
| 33   |                                                                       | 05     | 05  | 07  | cess           |
| GO:0 |                                                                       |        | 8.8 | 0.0 | geneontology_  |
| 0303 | positive regulation of cell migration                                 | 2.5943 | 1E- | 053 | Biological_Pro |
| 35   |                                                                       | 97     | 05  | 89  | cess           |
| GO:0 |                                                                       |        | 8.9 | 0.0 | geneontology_  |
| 0034 | chondrocyte morphogenesis involved in endochondral bone morphogenesis | 15.686 | 4E- | 053 | Biological_Pro |
| 14   |                                                                       | 12     | 05  | 89  | cess           |
| GO:0 |                                                                       |        | 8.9 | 0.0 | geneontology_  |
| 0034 | growth plate cartilage morphogenesis                                  | 15.686 | 4E- | 053 | Biological_Pro |
|      |                                                                       | 12     |     |     |                |

---

---

|      |                                         |        |     |     |                |
|------|-----------------------------------------|--------|-----|-----|----------------|
| 22   |                                         |        | 05  | 89  | cess           |
| GO:0 | growth plate cartilage chondrocyte      | 15.686 | 8.9 | 0.0 | geneontology_  |
| 0034 | morphogenesis                           | 12     | 4E- | 053 | Biological_Pro |
| 29   |                                         |        | 05  | 89  | cess           |
| GO:0 | chondrocyte morphogenesis               | 15.686 | 8.9 | 0.0 | geneontology_  |
| 0901 |                                         | 12     | 4E- | 053 | Biological_Pro |
| 71   |                                         |        | 05  | 89  | cess           |
| GO:0 | tissue migration                        | 3.1340 | 8.9 | 0.0 | geneontology_  |
| 0901 |                                         | 1      | 5E- | 053 | Biological_Pro |
| 30   |                                         |        | 05  | 89  | cess           |
| GO:0 | negative regulation of locomotion       | 3.1340 | 8.9 | 0.0 | geneontology_  |
| 0400 |                                         | 1      | 5E- | 053 | Biological_Pro |
| 13   |                                         |        | 05  | 89  | cess           |
| GO:0 | positive regulation of protein kinase B | 4.0055 | 9.3 | 0.0 | geneontology_  |
| 0518 | signaling                               | 64     | 7E- | 055 | Biological_Pro |
| 97   |                                         |        | 05  | 85  | cess           |
| GO:0 | body morphogenesis                      | 7.8430 | 0.0 | 0.0 | geneontology_  |
| 0101 |                                         | 61     | 001 | 059 | Biological_Pro |
| 71   |                                         |        |     | 25  | cess           |
| GO:0 | positive regulation of locomotion       | 2.4897 | 0.0 | 0.0 | geneontology_  |
| 0400 |                                         | 16     | 001 | 061 | Biological_Pro |
| 17   |                                         |        | 05  | 18  | cess           |
| GO:0 | face morphogenesis                      | 10.195 | 0.0 | 0.0 | geneontology_  |
| 0603 |                                         | 98     | 001 | 061 | Biological_Pro |
| 25   |                                         |        | 07  | 57  | cess           |
| GO:0 | endochondral bone morphogenesis         | 6.2606 | 0.0 | 0.0 | geneontology_  |
| 0603 |                                         | 89     | 001 | 066 | Biological_Pro |
| 50   |                                         |        | 16  | 25  | cess           |
| GO:0 | muscle organ development                | 2.7956 | 0.0 | 0.0 | geneontology_  |
| 0075 |                                         | 72     | 001 | 070 | Biological_Pro |
| 17   |                                         |        | 25  | 48  | cess           |
| GO:0 | metanephros development                 | 5.2966 | 0.0 | 0.0 | geneontology_  |
| 0016 |                                         | 13     | 001 | 070 | Biological_Pro |
| 56   |                                         |        | 26  | 48  | cess           |
| GO:2 | positive regulation of cell motility    | 2.5237 | 0.0 | 0.0 | geneontology_  |
| 0001 |                                         | 57     | 001 | 071 | Biological_Pro |
| 47   |                                         |        | 28  | 26  | cess           |
| GO:0 | platelet activation                     | 3.8409 | 0.0 | 0.0 | geneontology_  |
| 0301 |                                         | 51     | 001 | 075 | Biological_Pro |
| 68   |                                         |        | 37  | 06  | cess           |
| GO:0 | endothelial cell migration              | 3.5567 | 0.0 | 0.0 | geneontology_  |
| 0435 |                                         | 37     | 001 | 077 | Biological_Pro |
| 42   |                                         |        | 42  | 12  | cess           |
| GO:0 | camera-type eye development             | 3.1303 | 0.0 | 0.0 | geneontology_  |

---



|      |                                                                                                 |        |     |     |                |
|------|-------------------------------------------------------------------------------------------------|--------|-----|-----|----------------|
| 0430 |                                                                                                 | 45     | 001 | 084 | Biological_Pro |
| 10   |                                                                                                 |        | 56  | 1   | cess           |
| GO:0 |                                                                                                 | 3.7636 | 0.0 | 0.0 | geneontology_  |
| 0435 | ear development                                                                                 |        | 001 | 087 | Biological_Pro |
| 83   |                                                                                                 | 17     | 64  | 37  | cess           |
| GO:0 |                                                                                                 | 3.1031 | 0.0 | 0.0 | geneontology_  |
| 0301 | regulation of Wnt signaling pathway                                                             |        | 001 | 090 | Biological_Pro |
| 11   |                                                                                                 | 24     | 71  | 44  | cess           |
| GO:0 |                                                                                                 | 2.4687 | 0.0 | 0.0 | geneontology_  |
| 0512 | positive regulation of cellular component movement                                              |        | 001 | 090 | Biological_Pro |
| 72   |                                                                                                 | 6      | 73  | 5   | cess           |
| GO:1 |                                                                                                 | 2.3896 | 0.0 | 0.0 | geneontology_  |
| 9051 | cell surface receptor signaling pathway involved in cell-cell signaling                         |        | 001 | 096 | Biological_Pro |
| 14   |                                                                                                 | 83     | 86  | 38  | cess           |
| GO:0 |                                                                                                 | 9.1035 | 0.0 | 0.0 | geneontology_  |
| 0435 | negative regulation of blood vessel endothelial cell migration                                  |        | 001 | 096 | Biological_Pro |
| 37   |                                                                                                 | 53     | 88  | 73  | cess           |
| GO:0 |                                                                                                 | 2.5158 | 0.0 | 0.0 | geneontology_  |
| 0020 | morphogenesis of an epithelium                                                                  |        | 001 | 101 | Biological_Pro |
| 09   |                                                                                                 | 91     | 98  | 07  | cess           |
| GO:0 |                                                                                                 | 4.9137 | 0.0 | 0.0 | geneontology_  |
| 0901 | negative regulation of transmembrane receptor protein serine/threonine kinase signaling pathway |        | 002 | 106 | Biological_Pro |
| 01   |                                                                                                 | 25     | 13  | 26  | cess           |
| GO:0 |                                                                                                 | 12.744 | 0.0 | 0.0 | geneontology_  |
| 0302 | chondroitin sulfate metabolic process                                                           |        | 002 | 106 | Biological_Pro |
| 04   |                                                                                                 | 97     | 17  | 26  | cess           |
| GO:0 |                                                                                                 | 12.744 | 0.0 | 0.0 | geneontology_  |
| 0506 | chondroitin sulfate proteoglycan metabolic process                                              |        | 002 | 106 | Biological_Pro |
| 54   |                                                                                                 | 97     | 17  | 26  | cess           |
| GO:0 |                                                                                                 | 12.744 | 0.0 | 0.0 | geneontology_  |
| 0034 | chondrocyte development involved in endochondral bone morphogenesis                             |        | 002 | 106 | Biological_Pro |
| 33   |                                                                                                 | 97     | 17  | 26  | cess           |
| GO:0 |                                                                                                 | 2.5776 | 0.0 | 0.0 | geneontology_  |
| 0072 | Ras protein signal transduction                                                                 |        | 002 | 106 | Biological_Pro |
| 65   |                                                                                                 | 35     | 18  | 26  | cess           |
| GO:0 |                                                                                                 | 4.8552 | 0.0 | 0.0 | geneontology_  |
| 0432 | response to amino acid                                                                          |        | 002 | 112 | Biological_Pro |
| 00   |                                                                                                 | 29     | 32  | 14  | cess           |
| GO:0 |                                                                                                 | 3.8915 | 0.0 | 0.0 | geneontology_  |
| 0105 | regulation of endothelial cell migration                                                        |        | 002 | 118 | Biological_Pro |
| 94   |                                                                                                 | 95     | 47  | 72  | cess           |
| GO:0 |                                                                                                 | 8.4966 | 0.0 | 0.0 | geneontology_  |
| 0020 | chondrocyte development                                                                         |        | 002 | 124 | Biological_Pro |
| 63   |                                                                                                 | 5      | 64  | 54  | cess           |

---

|      |                                             |        |     |     |                |
|------|---------------------------------------------|--------|-----|-----|----------------|
| GO:0 |                                             |        | 0.0 | 0.0 | geneontology_  |
| 0603 | head morphogenesis                          | 8.4966 | 002 | 124 | Biological_Pro |
| 23   |                                             | 5      | 64  | 54  | cess           |
| GO:0 |                                             |        | 0.0 | 0.0 | geneontology_  |
| 0612 | retina vasculature development in           | 11.995 | 002 | 126 | Biological_Pro |
| 98   | camera-type eye                             | 27     | 8   | 72  | cess           |
| GO:1 |                                             |        | 0.0 | 0.0 | geneontology_  |
| 9001 | extracellular regulation of signal          | 11.995 | 002 | 126 | Biological_Pro |
| 15   | transduction                                | 27     | 8   | 72  | cess           |
| GO:1 |                                             |        | 0.0 | 0.0 | geneontology_  |
| 9001 | extracellular negative regulation of signal | 11.995 | 002 | 126 | Biological_Pro |
| 16   | transduction                                | 27     | 8   | 72  | cess           |
| GO:0 |                                             |        | 0.0 | 0.0 | geneontology_  |
| 0850 | extracellular matrix assembly               | 11.995 | 002 | 126 | Biological_Pro |
| 29   |                                             | 27     | 8   | 72  | cess           |
| GO:0 |                                             |        | 0.0 | 0.0 | geneontology_  |
| 0034 | growth plate cartilage chondrocyte          | 11.995 | 002 | 126 | Biological_Pro |
| 18   | differentiation                             | 27     | 8   | 72  | cess           |
| GO:0 |                                             |        | 0.0 | 0.0 | geneontology_  |
| 0310 | actomyosin structure organization           | 3.5269 | 002 | 129 | Biological_Pro |
| 32   |                                             | 11     | 89  | 81  | cess           |
| GO:0 |                                             |        | 0.0 | 0.0 | geneontology_  |
| 0519 | positive regulation of nervous system       | 2.4398 | 002 | 130 | Biological_Pro |
| 62   | development                                 | 44     | 93  | 49  | cess           |
| GO:0 |                                             |        | 0.0 | 0.0 | geneontology_  |
| 0485 | eye morphogenesis                           | 4.1335 | 003 | 142 | Biological_Pro |
| 92   |                                             | 05     | 23  | 79  | cess           |
| GO:0 |                                             |        | 0.0 | 0.0 | geneontology_  |
| 0305 | BMP signaling pathway                       | 4.0965 | 003 | 151 | Biological_Pro |
| 09   |                                             | 99     | 45  | 49  | cess           |
| GO:0 |                                             |        | 0.0 | 0.0 | geneontology_  |
| 0487 | smooth muscle tissue development            | 11.328 | 003 | 154 | Biological_Pro |
| 45   |                                             | 87     | 54  | 26  | cess           |
| GO:0 |                                             |        | 0.0 | 0.0 | geneontology_  |
| 0511 | smooth muscle cell differentiation          | 6.2424 | 003 | 158 | Biological_Pro |
| 45   |                                             | 37     | 66  | 14  | cess           |
| GO:0 |                                             |        | 0.0 | 0.0 | geneontology_  |
| 0465 | positive regulation of Ras protein signal   | 6.1175 | 004 | 175 | Biological_Pro |
| 79   | transduction                                | 88     | 09  | 47  | cess           |
| GO:0 |                                             |        | 0.0 | 0.0 | geneontology_  |
| 0108 | regulation of cell-substrate adhesion       | 3.3781 | 004 | 178 | Biological_Pro |
| 10   |                                             | 86     | 18  | 06  | cess           |
| GO:0 |                                             |        | 0.0 | 0.0 | geneontology_  |
| 0301 | positive regulation of Wnt signaling        | 4.3853 | 004 | 195 | Biological_Pro |
| 0301 | pathway                                     | 68     |     |     |                |

---

---

|      |                                                                   |        |     |     |                |
|------|-------------------------------------------------------------------|--------|-----|-----|----------------|
| 77   |                                                                   |        | 66  | 55  | cess           |
| GO:0 |                                                                   | 2.5894 | 0.0 | 0.0 | geneontology_  |
| 0485 | embryonic organ development                                       |        | 004 | 195 | Biological_Pro |
| 68   |                                                                   | 55     | 66  | 55  | cess           |
| GO:0 |                                                                   | 7.4970 | 0.0 | 0.0 | geneontology_  |
| 0060 | proteoglycan metabolic process                                    |        | 004 | 201 | Biological_Pro |
| 29   |                                                                   | 44     | 84  | 28  | cess           |
| GO:0 |                                                                   | 3.3182 | 0.0 | 0.0 | geneontology_  |
| 0017 | morphogenesis of a branching structure                            |        | 004 | 201 | Biological_Pro |
| 63   |                                                                   | 18     | 87  | 28  | cess           |
| GO:0 |                                                                   | 2.9195 | 0.0 | 0.0 | geneontology_  |
| 0018 | kidney development                                                |        | 005 | 215 | Biological_Pro |
| 22   |                                                                   | 54     | 25  | 18  | cess           |
| GO:0 |                                                                   | 4.2930 | 0.0 | 0.0 | geneontology_  |
| 0020 | sprouting angiogenesis                                            |        | 005 | 219 | Biological_Pro |
| 40   |                                                                   | 44     | 38  | 07  | cess           |
| GO:0 |                                                                   | 3.8234 | 0.0 | 0.0 | geneontology_  |
| 0717 | response to BMP                                                   |        | 005 | 230 | Biological_Pro |
| 72   |                                                                   | 92     | 74  | 59  | cess           |
| GO:0 |                                                                   | 3.8234 | 0.0 | 0.0 | geneontology_  |
| 0717 | cellular response to BMP stimulus                                 |        | 005 | 230 | Biological_Pro |
| 73   |                                                                   | 92     | 74  | 59  | cess           |
| GO:0 |                                                                   | 2.6278 | 0.0 | 0.0 | geneontology_  |
| 0075 | hemostasis                                                        |        | 006 | 240 | Biological_Pro |
| 99   |                                                                   | 3      | 02  | 14  | cess           |
| GO:0 |                                                                   | 2.7345 | 0.0 | 0.0 | geneontology_  |
| 0329 | regulation of actin cytoskeleton organization                     |        | 006 | 245 | Biological_Pro |
| 56   |                                                                   | 54     | 19  | 19  | cess           |
| GO:0 |                                                                   | 7.0805 | 0.0 | 0.0 | geneontology_  |
| 0019 | blood vessel remodeling                                           |        | 006 | 247 | Biological_Pro |
| 74   |                                                                   | 42     | 35  | 87  | cess           |
| GO:0 |                                                                   | 7.0805 | 0.0 | 0.0 | geneontology_  |
| 0603 | cartilage development involved in endochondral bone morphogenesis |        | 006 | 247 | Biological_Pro |
| 51   |                                                                   | 42     | 35  | 87  | cess           |
| GO:0 |                                                                   | 4.7581 | 0.0 | 0.0 | geneontology_  |
| 0344 | substrate adhesion-dependent cell spreading                       |        | 006 | 250 | Biological_Pro |
| 46   |                                                                   | 24     | 46  | 55  | cess           |
| GO:0 |                                                                   | 9.7104 | 0.0 | 0.0 | geneontology_  |
| 0605 | cartilage morphogenesis                                           |        | 006 | 254 | Biological_Pro |
| 36   |                                                                   | 57     | 62  | 81  | cess           |
| GO:0 |                                                                   | 3.1682 | 0.0 | 0.0 | geneontology_  |
| 0518 | regulation of protein kinase B signaling                          |        | 007 | 274 | Biological_Pro |
| 96   |                                                                   | 42     | 18  | 51  | cess           |
| GO:0 | glycosaminoglycan catabolic process                               | 6.8891 | 0.0 | 0.0 | geneontology_  |

---

|      |                                         |        |     |     |                |
|------|-----------------------------------------|--------|-----|-----|----------------|
| 0060 |                                         | 76     | 007 | 274 | Biological_Pro |
| 27   |                                         |        | 23  | 51  | cess           |
| GO:0 | negative regulation of Wnt signaling    | 3.7001 | 0.0 | 0.0 | geneontology_  |
| 0301 | pathway                                 | 54     | 007 | 275 | Biological_Pro |
| 78   |                                         |        | 29  | 02  | cess           |
| GO:0 | Wnt signaling pathway                   | 2.4007 | 0.0 | 0.0 | geneontology_  |
| 0160 |                                         | 15     | 007 | 275 | Biological_Pro |
| 55   |                                         |        | 35  | 73  | cess           |
| GO:0 | positive regulation of small GTPase     | 5.4621 | 0.0 | 0.0 | geneontology_  |
| 0510 | mediated signal transduction            | 32     | 007 | 280 | Biological_Pro |
| 57   |                                         |        | 58  | 62  | cess           |
| GO:1 | mucopolysaccharide metabolic process    | 5.4621 | 0.0 | 0.0 | geneontology_  |
| 9035 |                                         | 32     | 007 | 280 | Biological_Pro |
| 10   |                                         |        | 58  | 62  | cess           |
| GO:0 | chondrocyte differentiation involved in | 9.2690 | 0.0 | 0.0 | geneontology_  |
| 0034 | endochondral bone morphogenesis         | 73     | 007 | 288 | Biological_Pro |
| 13   |                                         |        | 96  | 98  | cess           |
| GO:0 | response to acid chemical               | 2.6631 | 0.0 | 0.0 | geneontology_  |
| 0011 |                                         | 29     | 008 | 288 | Biological_Pro |
| 01   |                                         |        | 03  | 98  | cess           |
| GO:0 | negative regulation of interleukin-17   | 15.293 | 0.0 | 0.0 | geneontology_  |
| 0327 | production                              | 97     | 008 | 288 | Biological_Pro |
| 00   |                                         |        | 06  | 98  | cess           |
| GO:0 | chondroitin sulfate catabolic process   | 15.293 | 0.0 | 0.0 | geneontology_  |
| 0302 |                                         | 97     | 008 | 288 | Biological_Pro |
| 07   |                                         |        | 06  | 98  | cess           |
| GO:0 | cell-cell signaling by wnt              | 2.3809 | 0.0 | 0.0 | geneontology_  |
| 1987 |                                         | 29     | 008 | 288 | Biological_Pro |
| 38   |                                         |        | 07  | 98  | cess           |
| GO:0 | renal system development                | 2.7729 | 0.0 | 0.0 | geneontology_  |
| 0720 |                                         | 65     | 008 | 302 | Biological_Pro |
| 01   |                                         |        | 5   | 55  | cess           |
| GO:0 | positive regulation of neurogenesis     | 2.3614 | 0.0 | 0.0 | geneontology_  |
| 0507 |                                         | 67     | 008 | 312 | Biological_Pro |
| 69   |                                         |        | 83  | 57  | cess           |
| GO:0 | epithelial cell proliferation           | 2.5237 | 0.0 | 0.0 | geneontology_  |
| 0506 |                                         | 57     | 009 | 319 | Biological_Pro |
| 73   |                                         |        | 12  | 85  | cess           |
| GO:0 | myofibril assembly                      | 5.2737 | 0.0 | 0.0 | geneontology_  |
| 0302 |                                         | 83     | 009 | 319 | Biological_Pro |
| 39   |                                         |        | 15  | 85  | cess           |
| GO:0 | aminoglycan catabolic process           | 6.5358 | 0.0 | 0.0 | geneontology_  |
| 0060 |                                         | 85     | 009 | 321 | Biological_Pro |
| 26   |                                         |        | 25  | 1   | cess           |

---

|             |                                                                            |          |       |        |                                 |
|-------------|----------------------------------------------------------------------------|----------|-------|--------|---------------------------------|
| GO:0010632  | regulation of epithelial cell migration                                    | 3.064366 | 0.046 | 0.072  | geneontology_Biological_Process |
| GO:0030166  | proteoglycan biosynthetic process                                          | 8.866069 | 0.049 | 0.072  | geneontology_Biological_Process |
| GO:00002576 | platelet degranulation                                                     | 3.884183 | 0.045 | 0.026  | geneontology_Biological_Process |
| GO:0060537  | muscle tissue development                                                  | 2.482787 | 0.076 | 0.055  | geneontology_Biological_Process |
| GO:0061138  | morphogenesis of a branching epithelium                                    | 3.226576 | 0.086 | 0.055  | geneontology_Biological_Process |
| GO:0060841  | venous blood vessel development                                            | 13.90361 | 0.092 | 0.055  | geneontology_Biological_Process |
| GO:0034309  | primary alcohol biosynthetic process                                       | 13.90361 | 0.092 | 0.055  | geneontology_Biological_Process |
| GO:0040037  | negative regulation of fibroblast growth factor receptor signaling pathway | 13.90361 | 0.092 | 0.055  | geneontology_Biological_Process |
| GO:0035023  | regulation of Rho protein signal transduction                              | 3.84754  | 0.011 | 0.077  | geneontology_Biological_Process |
| GO:0060324  | face development                                                           | 6.217061 | 0.066 | 0.005  | geneontology_Biological_Process |
| GO:0072175  | epithelial tube formation                                                  | 3.776289 | 0.055 | 0.025  | geneontology_Biological_Process |
| GO:0060562  | epithelial tube morphogenesis                                              | 2.650955 | 0.083 | 0.0415 | geneontology_Biological_Process |
| GO:00101718 | positive regulation of epithelial to mesenchymal transition                | 6.069036 | 0.003 | 0.097  | geneontology_Biological_Process |
| GO:0045666  | positive regulation of neuron differentiation                              | 2.530917 | 0.012 | 0.097  | geneontology_Biological_Process |
| GO:00443    | wound healing, spreading of cells                                          | 8.156784 | 0.013 | 0.0415 | geneontology_Biological_Process |

---

|      |                                                                             |        |     |     |                |
|------|-----------------------------------------------------------------------------|--------|-----|-----|----------------|
| 19   |                                                                             |        | 15  | 97  | cess           |
| GO:0 |                                                                             |        | 0.0 | 0.0 | geneontology_  |
| 0905 | epiboly involved in wound healing                                           | 8.1567 | 013 | 415 | Biological_Pro |
| 05   |                                                                             | 84     | 15  | 97  | cess           |
| GO:0 |                                                                             |        | 0.0 | 0.0 | geneontology_  |
| 0018 | epithelial to mesenchymal transition                                        | 3.7076 | 014 | 444 | Biological_Pro |
| 37   |                                                                             | 29     | 13  | 29  | cess           |
| GO:0 |                                                                             |        | 0.0 | 0.0 | geneontology_  |
| 0019 | lymphangiogenesis                                                           | 12.744 | 014 | 446 | Biological_Pro |
| 46   |                                                                             | 97     | 35  | 42  | cess           |
| GO:0 |                                                                             |        | 0.0 | 0.0 | geneontology_  |
| 0109 | regulation of macrophage cytokine production                                | 12.744 | 014 | 446 | Biological_Pro |
| 35   |                                                                             | 97     | 35  | 42  | cess           |
| GO:0 |                                                                             |        | 0.0 | 0.0 | geneontology_  |
| 0075 | blood coagulation                                                           | 2.4955 | 014 | 463 | Biological_Pro |
| 96   |                                                                             | 2      | 99  | 74  | cess           |
| GO:0 |                                                                             |        | 0.0 | 0.0 | geneontology_  |
| 0072 | Rho protein signal transduction                                             | 3.0896 | 015 | 463 | Biological_Pro |
| 66   |                                                                             | 91     | 08  | 83  | cess           |
| GO:0 |                                                                             |        | 0.0 | 0.0 | geneontology_  |
| 0905 | epiboly                                                                     | 7.8430 | 015 | 465 | Biological_Pro |
| 04   |                                                                             | 61     | 31  | 92  | cess           |
| GO:0 |                                                                             |        | 0.0 | 0.0 | geneontology_  |
| 0309 | regulation of vascular endothelial growth factor receptor signaling pathway | 7.8430 | 015 | 465 | Biological_Pro |
| 47   |                                                                             | 61     | 31  | 92  | cess           |
| GO:0 |                                                                             |        |     |     | geneontology_  |
| 0310 | extracellular matrix                                                        | 7.7208 | 0   | 0   | Cellular_Comp  |
| 12   |                                                                             | 57     |     |     | onent          |
| GO:0 |                                                                             |        |     |     | geneontology_  |
| 0620 | collagen-containing extracellular matrix                                    | 8.6217 | 0   | 0   | Cellular_Comp  |
| 23   |                                                                             | 82     |     |     | onent          |
| GO:0 |                                                                             |        | 5.7 | 1.3 | geneontology_  |
| 0055 | collagen trimer                                                             | 16.753 | 7E- | 6E- | Cellular_Comp  |
| 81   |                                                                             | 42     | 15  | 12  | onent          |
| GO:0 |                                                                             |        | 1.3 | 2.3 | geneontology_  |
| 0057 | endoplasmic reticulum lumen                                                 | 6.6440 | 0E- | 0E- | Cellular_Comp  |
| 88   |                                                                             | 9      | 13  | 11  | onent          |
| GO:0 |                                                                             |        | 6.6 | 9.4 | geneontology_  |
| 0056 | basement membrane                                                           | 11.536 | 9E- | 7E- | Cellular_Comp  |
| 04   |                                                                             | 14     | 11  | 09  | onent          |
| GO:0 |                                                                             |        | 7.1 | 8.4 | geneontology_  |
| 0444 | extracellular matrix component                                              | 15.065 | 6E- | 4E- | Cellular_Comp  |
| 20   |                                                                             | 09     | 10  | 08  | onent          |
| GO:0 |                                                                             |        | 5.0 | 5.1 | geneontology_  |
|      | complex of collagen trimers                                                 | 25.192 |     |     |                |

|      |                                           |        |     |     |               |
|------|-------------------------------------------|--------|-----|-----|---------------|
| 0986 |                                           | 17     | 5E- | 0E- | Cellular_Comp |
| 44   |                                           |        | 09  | 07  | onent         |
| GO:0 |                                           | 3.2585 | 1.5 | 1.3 | geneontology_ |
| 0701 | anchoring junction                        |        | 2E- | 4E- | Cellular_Comp |
| 61   |                                           | 45     | 07  | 05  | onent         |
| GO:0 |                                           | 32.389 | 1.9 | 1.3 | geneontology_ |
| 0055 | fibrillar collagen trimer                 |        | 5E- | 8E- | Cellular_Comp |
| 83   |                                           | 94     | 07  | 05  | onent         |
| GO:0 |                                           | 32.389 | 1.9 | 1.3 | geneontology_ |
| 0986 | banded collagen fibril                    |        | 5E- | 8E- | Cellular_Comp |
| 43   |                                           | 94     | 07  | 05  | onent         |
| GO:0 |                                           | 15.115 | 2.7 | 1.7 | geneontology_ |
| 0083 | integrin complex                          |        | 6E- | 8E- | Cellular_Comp |
| 05   |                                           | 3      | 07  | 05  | onent         |
| GO:0 |                                           | 3.2122 | 3.6 | 2.1 | geneontology_ |
| 0059 | adherens junction                         |        | 2E- | 3E- | Cellular_Comp |
| 12   |                                           | 25     | 07  | 05  | onent         |
| GO:0 |                                           | 13.741 | 5.5 | 3.0 | geneontology_ |
| 0986 | protein complex involved in cell adhesion |        | 8E- | 3E- | Cellular_Comp |
| 36   |                                           | 19     | 07  | 05  | onent         |
| GO:0 |                                           | 3.3175 | 4.2 | 0.0 | geneontology_ |
| 0059 | focal adhesion                            |        | 0E- | 002 | Cellular_Comp |
| 25   |                                           | 68     | 06  | 05  | onent         |
| GO:0 |                                           | 3.2997 | 4.5 | 0.0 | geneontology_ |
| 0059 | cell-substrate adherens junction          |        | 4E- | 002 | Cellular_Comp |
| 24   |                                           | 79     | 06  | 05  | onent         |
| GO:0 |                                           | 3.4396 | 4.6 | 0.0 | geneontology_ |
| 0432 | receptor complex                          |        | 4E- | 002 | Cellular_Comp |
| 35   |                                           | 39     | 06  | 05  | onent         |
| GO:0 |                                           | 3.2734 | 5.1 | 0.0 | geneontology_ |
| 0300 | cell-substrate junction                   |        | 0E- | 002 | Cellular_Comp |
| 55   |                                           | 51     | 06  | 12  | onent         |
| GO:0 |                                           | 6.6440 | 2.5 | 0.0 | geneontology_ |
| 0310 | platelet alpha granule                    |        | 4E- | 009 | Cellular_Comp |
| 91   |                                           | 9      | 05  | 96  | onent         |
| GO:0 |                                           | 4.9830 | 0.0 | 0.0 | geneontology_ |
| 0432 | apical junction complex                   |        | 001 | 071 | Cellular_Comp |
| 96   |                                           | 67     | 99  | 54  | onent         |
| GO:0 |                                           | 6.9407 | 0.0 | 0.0 | geneontology_ |
| 0310 | platelet alpha granule lumen              |        | 002 | 071 | Cellular_Comp |
| 93   |                                           | 01     | 11  | 54  | onent         |
| GO:0 |                                           | 2.8919 | 0.0 | 0.0 | geneontology_ |
| 0312 | cell leading edge                         |        | 002 | 071 | Cellular_Comp |
| 52   |                                           | 59     | 12  | 54  | onent         |

|            |                                                                         |          |         |          |                                 |
|------------|-------------------------------------------------------------------------|----------|---------|----------|---------------------------------|
| GO:0005796 | Golgi lumen                                                             | 5.668239 | 0.00226 | 0.007266 | geneontology_Cellular_Component |
| GO:0009897 | plasma membrane protein complex                                         | 2.491534 | 0.00315 | 0.009681 | geneontology_Cellular_Component |
| GO:0005432 | lysosomal lumen                                                         | 6.073113 | 0.00441 | 0.012988 | geneontology_Cellular_Component |
| GO:0009989 | external side of plasma membrane                                        | 3.098168 | 0.00862 | 0.02438  | geneontology_Cellular_Component |
| GO:0003002 | lamellipodium                                                           | 3.491131 | 0.01113 | 0.030146 | geneontology_Cellular_Component |
| GO:0009852 | side of membrane                                                        | 2.459995 | 0.01151 | 0.030146 | geneontology_Cellular_Component |
| GO:0005052 | extracellular matrix structural constituent                             | 12.63706 | 0       | 0        | geneontology_Molecular_Function |
| GO:0005055 | collagen binding                                                        | 15.7942  | 1.4E-15 | 6.8E-13  | geneontology_Molecular_Function |
| GO:0005030 | extracellular matrix structural constituent conferring tensile strength | 20.59373 | 1.6E-12 | 5.0E-10  | geneontology_Molecular_Function |
| GO:0004847 | platelet-derived growth factor binding                                  | 34.54981 | 2.0E-10 | 4.7E-08  | geneontology_Molecular_Function |
| GO:0001983 | growth factor binding                                                   | 7.143757 | 2.3E-09 | 4.3E-07  | geneontology_Molecular_Function |
| GO:0005051 | integrin binding                                                        | 6.301814 | 1.2E-07 | 1.9E-05  | geneontology_Molecular_Function |
| GO:0005055 | glycosaminoglycan binding                                               | 5.288236 | 1.4E-07 | 1.9E-05  | geneontology_Molecular_Function |
| GO:0004339 | proteoglycan binding                                                    | 12.66826 | 9.1E-07 | 0.0009   | geneontology_Molecular_Function |
| GO:0005058 | extracellular matrix binding                                            | 9.652009 | 1.3E-07 | 0.0001   | geneontology_Molecular_Function |



---

|      |                                                                               |        |     |     |               |
|------|-------------------------------------------------------------------------------|--------|-----|-----|---------------|
| 40   |                                                                               |        | 06  | 45  | ction         |
| GO:1 |                                                                               |        | 2.5 | 0.0 | geneontology_ |
| 9016 | sulfur compound binding                                                       | 4.5243 | 1E- | 002 | Molecular_Fun |
| 81   |                                                                               | 79     | 06  | 38  | ction         |
| GO:0 |                                                                               |        | 1.0 | 0.0 | geneontology_ |
| 0082 | heparin binding                                                               | 5.0611 | 7E- | 009 | Molecular_Fun |
| 01   |                                                                               | 7      | 05  | 2   | ction         |
| GO:0 |                                                                               |        | 5.5 | 0.0 | geneontology_ |
| 0463 | SMAD binding                                                                  | 5.9498 | 2E- | 043 | Molecular_Fun |
| 32   |                                                                               | 69     | 05  | 67  | ction         |
| GO:0 |                                                                               |        | 8.6 | 0.0 | geneontology_ |
| 0050 | guanyl-nucleotide exchange factor activity                                    | 3.1443 | 0E- | 062 | Molecular_Fun |
| 85   |                                                                               | 56     | 05  | 84  | ction         |
| GO:0 |                                                                               |        | 9.6 | 0.0 | geneontology_ |
| 0300 | extracellular matrix structural constituent conferring compression resistance | 15.512 | 6E- | 065 | Molecular_Fun |
| 21   |                                                                               | 16     | 05  | 53  | ction         |
| GO:0 |                                                                               |        | 0.0 | 0.0 | geneontology_ |
| 0020 | protease binding                                                              | 4.2489 | 002 | 167 | Molecular_Fun |
| 20   |                                                                               | 82     | 64  | 34  | ction         |
| GO:0 |                                                                               |        | 0.0 | 0.0 | geneontology_ |
| 0019 | fibronectin binding                                                           | 10.341 | 005 | 309 | Molecular_Fun |
| 68   |                                                                               | 44     | 22  | 88  | ction         |
| GO:0 |                                                                               |        | 0.0 | 0.0 | geneontology_ |
| 0302 | carbohydrate binding                                                          | 3.3722 | 007 | 433 | Molecular_Fun |
| 46   |                                                                               | 08     | 75  | 27  | ction         |
| GO:0 |                                                                               |        | 0.0 | 0.0 | geneontology_ |
| 0012 | DNA-binding transcription repressor activity, RNA polymerase II-specific      | 3.1105 | 008 | 442 | Molecular_Fun |
| 27   |                                                                               | 11     | 37  |     | ction         |
| GO:0 |                                                                               |        | 0.0 | 0.0 | geneontology_ |
| 0199 | cytokine binding                                                              | 3.9847 | 008 | 444 | Molecular_Fun |
| 55   |                                                                               | 75     | 88  | 01  | ction         |

---
