# Supplementary figures and images for: Immune Subtype Profiling and Establishment of Prognostic Immune-Related lncRNA Pairs in Human Ovarian Cancer
Source: PubMed Central journal article supplement (PMC9107039; doi:10.1155/2022/8338137), 2022-05-05

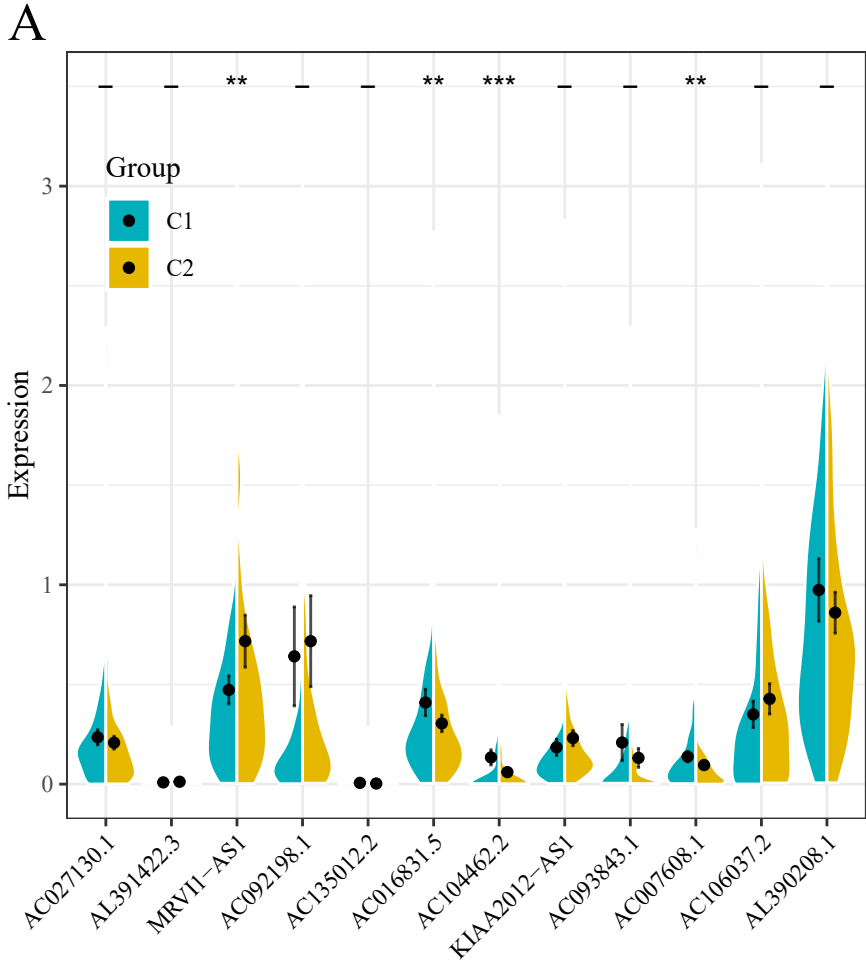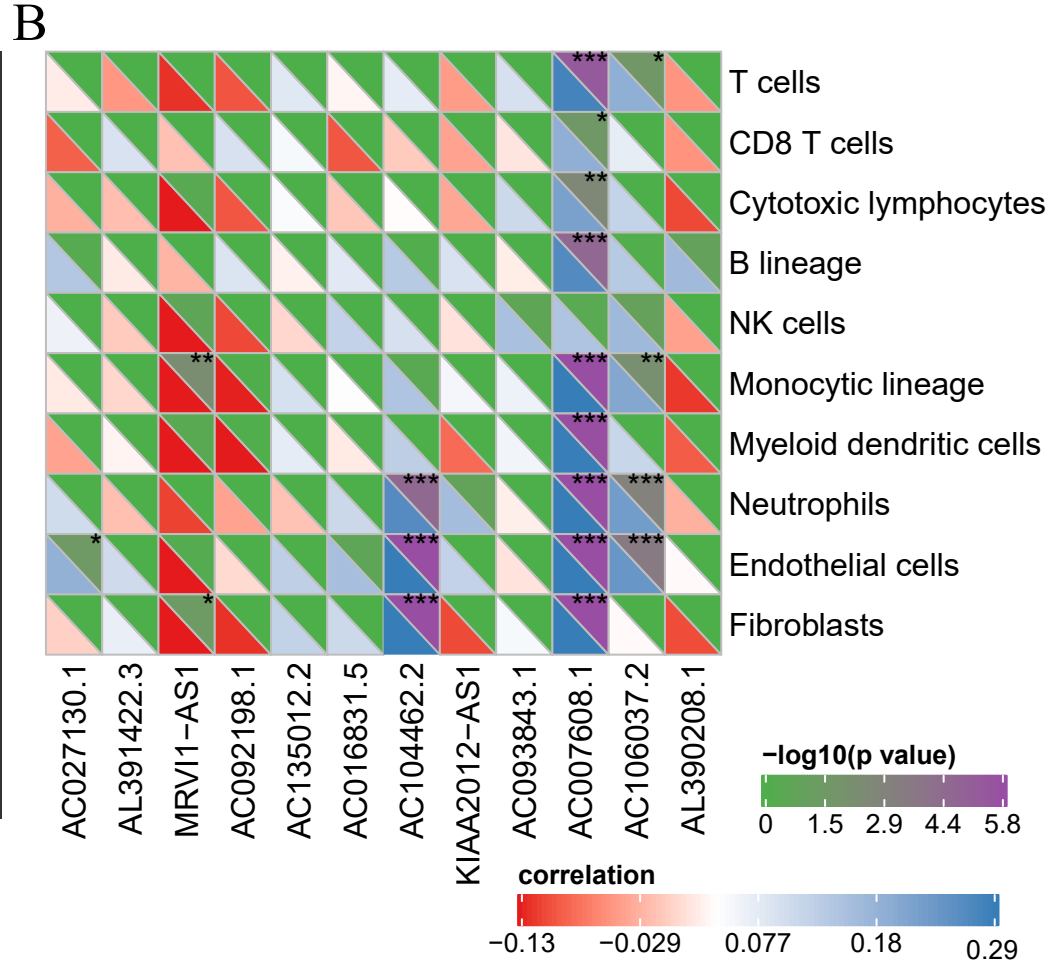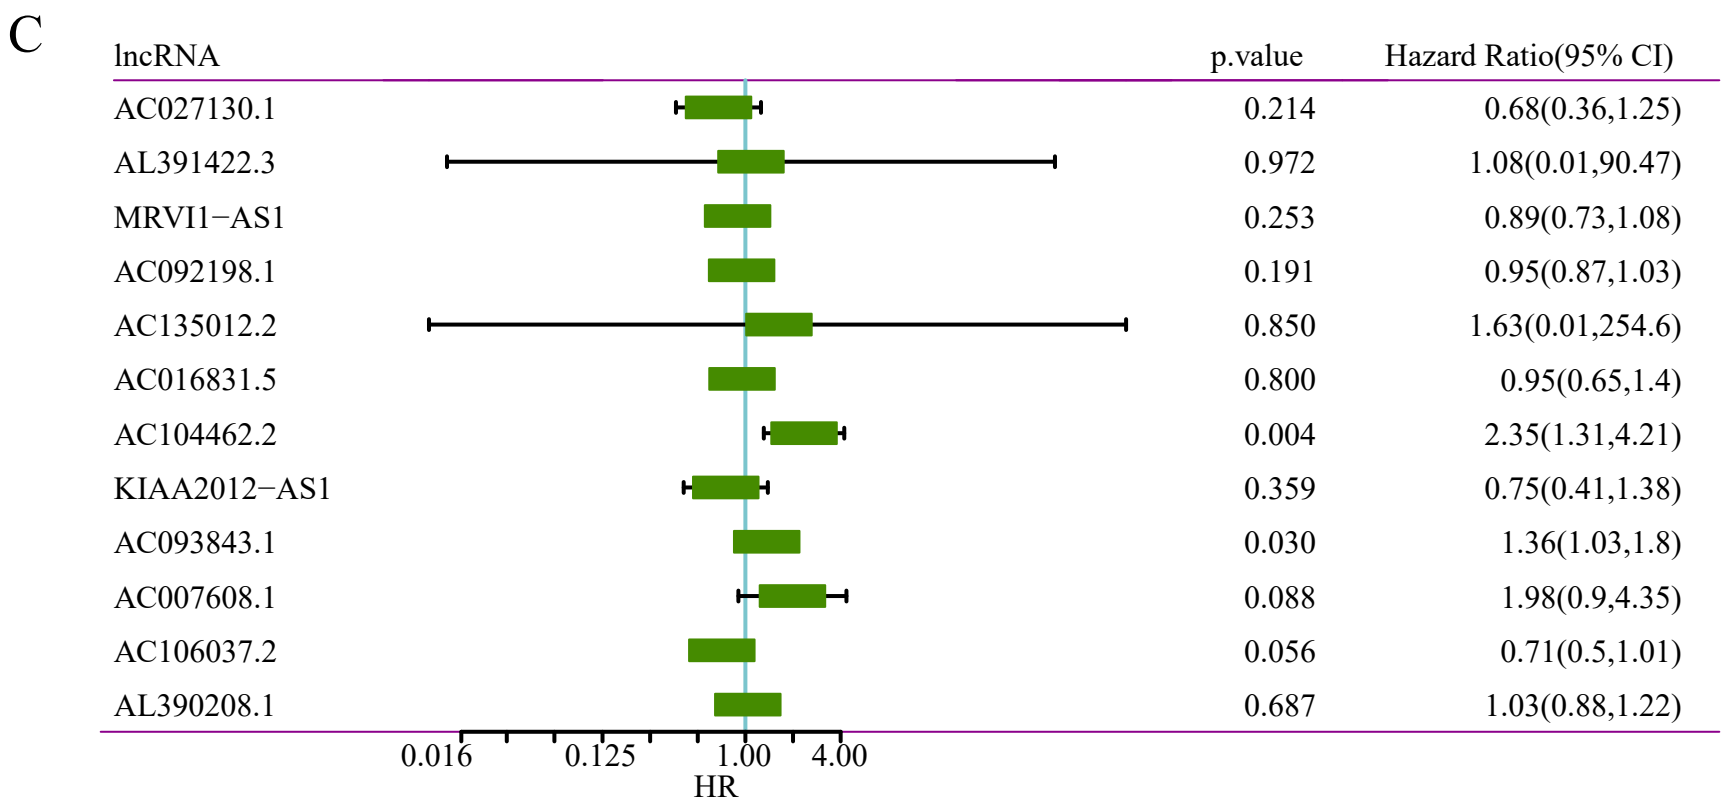

Supplement: 8338137.f1.pdf [file 8338137.f1.pdf]
